# Supplementary material for: An integrated metabolome and transcriptome approach reveals the fruit flavor and regulatory network during jujube fruit development
Source: Front Plant Sci. 2022 Sep 23;13:952698. doi: 10.3389/fpls.2022.952698 (PMC9537746; doi:10.3389/fpls.2022.952698)
Supplement: Supplementary file 1 [file Table_1.XLSX]

## Sheet: Table S1
Table S1 The metabolite accumulation patterns during jujube fruit development.
Index	Q1 (Da)	Q3 (Da)	Molecular Weight (Da)	Formula	Ionization model	Compounds	Class I	Class II	CAS	Level	ST1-1	ST1-2	ST1-3	ST2-1	ST2-2	ST2-3	ST3-1	ST3-2	ST3-3	ST4-1	ST4-2	ST4-3	ST5-1	ST5-2	ST5-3	HK1-1	HK1-2	HK1-3	HK2-1	HK2-2	HK2-3	HK3-1	HK3-2	HK3-3	HK4-1	HK4-2	HK4-3	HK5-1	HK5-2	HK5-3	mix01	mix02	mix03	mix04	cpd_ID	kegg_map
pme3200	74	57	73.064	C2H7N3	[M+H]+	1-methylguanidine	Nucleotides and derivatives	Nucleotides and derivatives	471-29-4	3	86812	93081	68630	94342	80630	67973	147380	150560	149750	124600	139940	141040	133170	132580	130560	85319	72587	63608	83583	82506	71044	132800	123390	128670	110850	111540	104420	98114	100810	102540	120650	123620	113670	109600	C02294	--
MWS0502	90.06	61.03	89.048	C3H7NO2	[M+H]+	β-Alanine	Amino acids and derivatives	Amino acids and derivatives	107-95-9	3	193340	199470	148110	181940	180080	178630	292540	320080	292740	287250	283810	296130	279400	228260	278480	139850	183400	109980	151230	138930	140560	270690	239600	257850	179690	201430	199660	165500	178840	181160	256610	265790	245410	253800	C00099	ko00240,ko00410,ko00640,ko00770,ko01100,ko01110,ko01240
Lmqp000873	101.02	55.02	100.018	C4H4O3	[M+H]+	Succinic anhydride	Organic acids	Organic acids	108-30-5	3	88264	76750	84155	97165	97750	101860	88149	80930	100290	87851	91328	63510	89422	63183	84830	214570	193590	180960	208320	205980	203670	178210	100580	160680	145070	174770	116090	282620	266650	271880	114300	109840	143570	119510	C19524	--
mws4052	102.05	56.05	101.048	C4H7NO2	[M+H]+	1-Aminocyclopropane-1-carboxylic acid	Organic acids	Organic acids	22059-21-8	3	21821	9320.8	33040	43886	32222	43038	51534	44472	42309	49065	51163	36766	26737	25945	33341	53773	35496	41649	24913	45765	47325	70468	45371	73158	42972	37930	41905	33375	25039	16394	39214	32692	34044	44289	C01234	ko00270,ko01100,ko01110
MWSmce461	102.05	56.05	101.1	C4H7NO2	[M+H]+	L-Azetidine-2-carboxylic acid	Amino acids and derivatives	Amino acids and derivatives	2133-34-8	3	32070	25671	22779	26695	38429	27715	41327	34005	29761	33511	47627	14022	24313	35930	25227	43426	30710	56192	31748	38882	45651	62104	75873	53291	55559	40559	33537	22386	20329	20234	38851	35832	39561	49923	--	--
Lmgn000219	101.02	55.02	102.032	C4H6O3	[M-H]-	Succinic semialdehyde	Organic acids	Organic acids	692-29-5	3	23677	21557	10208	21846	25448	26846	5343.8	5363.5	2396	10780	1787	9539	4182.5	8386	5393.2	30864	25174	20326	36770	33336	25844	12441	9486.2	20031	13461	17076	8319.5	10135	11208	12420	14846	15720	13056	5430	C00232	ko00250,ko00350,ko00650,ko00750,ko00760,ko01100,ko01200
pmf0256	101.1	84.7	102.104	C6H14O	[M-H]-	3-Methyl-1-pentanol	Others	Saccharides and Alcohols	589-35-5	3	33888	38663	49237	25641	24709	21322	8054.9	17300	20168	20407	12960	10179	8638.1	20663	19693	22460	20933	18200	13156	17577	16955	10384	8608.4	4064.9	9472.4	12945	11150	8159.2	14689	13188	18426	12087	16903	9394.2	--	--
pme3011	104.07	68.8	103.063	C4H9NO2	[M+H]+	γ-Aminobutyric acid	Organic acids	Organic acids	-	3	9	9	9	48270	58838	72402	55334	52943	45061	44424	48929	69155	54994	63220	63253	124930	105300	139320	98199	97731	128130	113640	91381	81515	111690	110120	116410	138230	192970	214100	88812	89707	89656	67963	C00334	ko00250,ko00330,ko00410,ko00650,ko00760,ko01100
pme3033	104.07	86	103.063	C4H9NO2	[M+H]+	N,N-Dimethylglycine	Amino acids and derivatives	Amino acids and derivatives	1118-68-9	3	131450	89101	134770	158260	100210	233100	276080	224110	173470	224090	216610	319020	228360	209670	259190	456200	480800	420700	325300	271230	353270	418390	370040	334290	412340	382760	438200	453520	619950	653030	274700	272020	274490	265820	C01026	ko00260,ko01100
pme3017	104.07	58	103.063	C4H9NO2	[M+H]+	2-Aminoisobutyric acid	Organic acids	Organic acids	62-57-7	3	592840	683010	698260	301800	248800	292480	36932	43824	34963	36554	29967	38194	33817	25290	36834	1614000	1562200	1590000	1360200	1384400	1453800	429230	501320	403830	446570	494170	433090	331490	287010	299950	593250	547980	496720	517980	C03665	--
ML10172161	103	59.01	104.011	C3H4O4	[M-H]-	Hydroxypyruvic acid	Organic acids	Organic acids	1113-60-6	3	179870	162460	154860	117410	53857	76770	9	8081.8	9	10945	9	11282	9	20696	9	133860	86811	91230	200240	180320	172370	58373	58642	39248	36812	40423	25880	9	4787.2	9	40427	30004	33334	29062	C00168	ko00260,ko00630,ko01100,ko01110,ko01200
Lmbn000193	103	59.01	104.011	C3H4O4	[M-H]-	Tartronate semialdehyde	Organic acids	Organic acids	2480-77-5	3	138680	126460	156230	94746	86727	97589	9	9	9	9	9	9	9	9	9	119620	88214	85944	190640	141160	147850	69484	45978	38329	25267	23164	27359	2713	7569.8	9	39768	40738	49270	39570	C01146	ko00053,ko00630,ko01100
pme1975	103	59	104.06	C3H4O4	[M-H]-	Malonic acid	Organic acids	Organic acids	141-82-2	3	1030800	895860	962670	641940	649630	670030	52676	73970	131120	73462	76971	61773	54381	90896	70120	717330	642450	736240	1048000	954100	915530	741800	856480	891940	497280	471720	474160	177580	168220	158330	608290	531560	540770	473800	C00383	ko00061,ko00240,ko00410,ko01100,ko01212
pme0010	106	60	105.043	C3H7NO3	[M+H]+	L-Serine	Amino acids and derivatives	Amino acids and derivatives	56-45-1	3	174560	211190	194100	387760	471950	384720	552020	474740	640070	642740	582860	167050	509460	453230	476520	762500	829750	1004600	682220	786630	539720	786520	811420	1071900	361350	337870	363640	222470	97471	226240	745720	648460	520480	568630	C00065	ko00260,ko00261,ko00270,ko00460,ko00564,ko00600,ko00630,ko00920,ko00970,ko01100,ko01110,ko01200,ko01230,ko01240,ko02010
pme0257	111.02	80	112.027	C4H4N2O2	[M-H]-	Uracil	Nucleotides and derivatives	Nucleotides and derivatives	66-22-8	3	28360	17896	38600	74269	37334	44956	16842	9	31134	33886	22466	45852	47210	24887	29380	118460	132020	97824	47253	34925	56802	14397	8032.5	11886	9	13882	23994	25916	23346	28872	43583	31970	32072	22599	C00106	ko00240,ko00410,ko00770,ko01100
NK10264105	114.09	81.06	113.084	C6H11NO	[M+H]+	ε-Caprolactam	Organic acids	Organic acids	105-60-2	1	1099300	1065400	1222100	1028300	841020	947040	725530	695680	686100	710360	712510	995610	635820	709350	600570	664220	741990	658160	756640	838410	821650	730630	718400	772150	410410	347500	406690	439090	566850	386250	689730	744910	639870	690190	C06593	ko01100
pme0006	116.07	70.1	115.063	C5H9NO2	[M+H]+	L-Proline	Amino acids and derivatives	Amino acids and derivatives	147-85-3	1	35752	29857	42557	154080	172270	199140	9534300	8542700	9344700	7496300	6549900	12351000	10797000	10301000	9314800	62700	76534	66758	104650	86857	82907	1358200	1428900	1253700	7203500	6777300	7896000	9374800	13287000	9706000	5033100	5216500	4760300	4291800	C00148	ko00330,ko00332,ko00970,ko01100,ko01110,ko01230,ko02010
mws0376	115	71	116.011	C4H4O4	[M-H]-	Fumaric acid	Organic acids	Organic acids	110-17-8	1	98628	92566	76524	26826	31952	30208	116020	105750	176370	204420	173850	30094	176350	358450	111300	28825	28172	14953	22329	36924	6996.8	173160	158260	146920	138460	172170	195630	217440	225170	202650	159860	124770	61769	111970	C00122	ko00020,ko00190,ko00220,ko00250,ko00350,ko00360,ko00620,ko00650,ko00760,ko01100,ko01110,ko01200
pmb1096	118.07	91	117.058	C8H7N	[M+H]+	Indole	Organic acids	Organic acids	120-72-9	1	65968	62095	59394	24800	24382	29993	9	12341	13060	13723	9	10544	11894	10933	7973.8	17275	14700	11073	16772	20596	16079	13750	17254	14438	12145	11533	9827.4	9985.5	9	8767.1	17747	14982	20982	17624	C00463	ko00380,ko00400,ko00402,ko01100,ko01110
mws0256	118.09	72.1	117.079	C5H11NO2	[M+H]+	L-Valine	Amino acids and derivatives	Amino acids and derivatives	72-18-4	1	4273900	4175300	4063200	4912800	4520400	4950000	12674000	11984000	12084000	12245000	11922000	10168000	13166000	12544000	12165000	5942000	6191300	5647200	4932200	4896700	5471900	11998000	12152000	11196000	5266400	5670200	5883200	5187500	3900200	4986200	7093100	7434900	7657200	7677300	C00183	ko00280,ko00290,ko00311,ko00460,ko00770,ko00966,ko00970,ko01100,ko01110,ko01210,ko01230,ko01240,ko02010
pme1730	117	59	118.027	C4H6O4	[M-H]-	D-Erythronolactone	Organic acids	Organic acids	15667-21-7	3	82738	51514	57782	67779	110680	52244	9	9	9	7092	9	9	9	12595	5336.3	156100	111330	104270	114930	90662	116820	36678	33702	31525	62544	25528	29519	13163	9807.3	16093	32784	49995	60726	30772	--	--
mws0470	117.02	73	118.027	C4H6O4	[M-H]-	Methylmalonic acid	Organic acids	Organic acids	516-05-2	1	5488900	5877700	6134900	5374600	5057600	5555400	4684100	5188100	5039200	5517900	5601800	5394300	3733500	6300500	3410900	12339000	11821000	11923000	13162000	12668000	12857000	8174500	7861800	8308000	8381400	8337400	9134800	15913000	17683000	16387000	7445800	6705000	6253800	7194600	C02170	ko00240,ko00280,ko00640,ko01100
mws0192	117.02	73	118.027	C4H6O4	[M-H]-	succinic acid	Organic acids	Organic acids	110-15-6	1	5331600	5971600	5910200	5922200	5367700	5493900	4724000	5392700	4984400	5611400	5222800	5367900	3920900	6170100	3193600	12030000	11062000	12535000	12887000	12663000	12404000	8037400	8701100	7986100	8173200	8435400	7265100	15127000	17332000	16445000	7226700	7014700	6743100	6491900	C00042	ko00020,ko00190,ko00250,ko00310,ko00350,ko00360,ko00620,ko00630,ko00640,ko00650,ko00760,ko00920,ko01100,ko01110,ko01200
mws0147	117.06	59	118.063	C5H10O3	[M-H]-	β-Hydroxyisovaleric acid	Organic acids	Organic acids	625-08-1	1	118870	104210	112460	60206	57959	54363	42459	46226	45867	46932	49567	48188	56250	89189	48271	84424	93121	92647	112920	100770	99093	48939	50816	49524	32377	29020	30316	35253	41258	34178	67393	63667	53068	60362	C20827	ko00280,ko01100
pme3096	118	74	119.022	C3H5NO4	[M-H]-	Aminomalonic acid	Organic acids	Organic acids	1068-84-4	3	208910	243470	231190	216020	164580	177350	192070	163480	173960	219000	189870	196350	140020	231180	131680	426320	483180	483490	527500	476660	502870	303600	317100	311490	336130	275110	345040	656330	728590	583020	266890	264090	242530	238010	C00872	--
mws0230	120.07	74	119.058	C4H9NO3	[M+H]+	L-Threonine	Amino acids and derivatives	Amino acids and derivatives	72-19-5	3	221230	272360	177070	334080	615460	394960	309350	292850	366230	403620	325500	225820	270530	454700	321940	448010	414130	430900	291190	267840	287970	576860	1221900	771180	297670	331350	304290	270300	208010	253970	497230	491400	314300	312900	C00188	ko00260,ko00261,ko00290,ko00860,ko00970,ko01100,ko01110,ko01230,ko02010
mws0671	120.07	74.1	119.058	C4H9NO3	[M+H]+	L-Homoserine	Amino acids and derivatives	Amino acids and derivatives	672-15-1	3	225060	319520	242310	438690	551430	415450	429300	400510	473550	367110	415200	273750	296320	614880	350430	470120	523440	501890	361630	323480	291130	834290	1528300	1044100	385400	379950	350000	292930	197820	304450	509300	591350	368370	441520	C00263	ko00260,ko00270,ko00300,ko00920,ko01100,ko01110,ko01230
MWSmce607	120.07	56.05	119.12	C4H9NO3	[M+H]+	DL-Threonine	Amino acids and derivatives	Amino acids and derivatives	80-68-2	3	105080	146810	87332	165480	250180	127490	160460	146850	166220	202180	170690	105180	150670	202960	106880	167390	174880	183470	131990	153240	102860	359940	592490	460010	156150	158080	151060	102850	69735	124410	217830	191690	169960	160000	--	--
pma0134	121.04	93.06	120.042	C4H8O4	[M+H]+	D-(-)-Threose	Others	Saccharides and Alcohols	95-43-2	3	88393	88145	97707	32914	26282	32615	11940	18965	21894	49558	12789	17942	23536	15005	19279	19824	13010	20781	18885	18532	22678	11651	15494	12233	10932	10308	7610.1	9	9	9	20791	25561	21620	16046	C06463	--
MWS4305	119.04	59.01	120.042	C4H8O4	[M-H]-	Erythrose	Others	Saccharides and Alcohols	583-50-6	3	40122	39052	39596	62974	50596	67357	30176	31098	24881	19351	25441	22147	24230	48974	29290	77048	52838	71581	84600	111420	98648	40344	37264	41241	54939	65240	30281	39172	37195	40134	56381	30274	46202	44929	C01796	--
pmb0069	122	105	121.053	C7H7NO	[M+H]+	Benzamide	Organic acids	Organic acids	55-21-0	3	67467	84335	80295	14984	18778	12459	18210	13565	25047	27889	16801	25035	16174	19819	15482	19161	15830	16235	23752	20592	26042	16307	15472	13472	9733.1	5467.2	6468.9	3482.6	3095.6	5109.6	25061	23663	14871	20701	C09815	--
pme0241	123.04	79	122.037	C7H6O2	[M+H]+	benzoic Acid	Organic acids	Organic acids	65-85-0	3	9	9	9	9	9	9	130530	157910	152470	160450	164620	158120	219050	272780	313790	9	9	9	9	9	9	9	9	9	28126	28143	40882	9	9	9	55276	60293	63604	55819	C00180	ko00360,ko01100,ko01110
mws0628	121.03	92	122.037	C7H6O2	[M-H]-	4-Hydroxybenzaldehyde	Organic acids	Organic acids	123-08-0	1	107750	95509	98920	111230	125640	109370	50500	35851	42198	52731	54468	49494	55819	86399	46366	29766	37553	40579	36524	36799	27283	69032	71869	70324	51829	53096	56650	57918	55750	57436	61788	52099	50450	64413	C00633	ko01100
mws0133	123.06	80.05	122.048	C6H6N2O	[M+H]+	Nicotinamide	Others	Vitamin	98-92-0	1	103190	94259	101340	76465	82621	68176	94286	86415	76943	600290	92150	90560	80393	99833	97362	77723	77460	83959	96015	91414	82331	90417	89919	98029	92724	105770	90496	152080	163040	170550	109490	102420	122630	121020	C00153	ko00760,ko01100,ko01240
pme0490	124.04	78	123.032	C6H5NO2	[M+H]+	Nicotinic acid (Vitamin B3)*	Others	Vitamin	59-67-6	3	26227	30129	21178	39781	28939	28622	181800	183630	207230	187610	182770	145590	136010	151470	135830	40267	42620	39087	41064	30739	43463	38561	51526	49768	149930	177270	171550	166920	126000	160110	89121	105860	72221	100900	C00253	ko00760,ko00960,ko01100,ko01110,ko01240
Lmbp000668	124.04	78.03	123.032	C6H5NO2	[M+H]+	Isonicotinic acid*	Others	Vitamin	55-22-1	3	33988	28872	22552	47874	30723	42651	201790	228760	232890	213940	200530	160850	171400	147630	161830	39980	38406	42364	35249	46709	41301	45569	47121	54127	158580	196780	185590	185490	131610	167300	101070	98868	98275	99294	C07446	--
pmb0302	126.1	96	125.024	C2H8NO3P	[M+H]+	2-Aminoethylphosphonic Acid	Lipids	Glycerol ester	2041-14-7	3	3296	3934.9	4602.1	4764.8	5815.3	5759.7	5160.5	7878.1	5133.6	7130.3	4862.9	8281.4	4015	3062.8	3465.3	1941.2	3165.3	9	9	9	9	2205	2134.7	2048.8	2582.4	1543.5	1694.4	1804.6	2017	1629.8	4064.9	6480	4730.8	4430.7	C03557	ko00440,ko01100,ko02010
ML10181668	130.09	84.08	129.079	C6H11NO2	[M+H]+	Cycloleucine	Amino acids and derivatives	Amino acids and derivatives	52-52-8	2	16514000	15786000	16421000	15328000	13589000	14927000	12131000	12028000	12629000	12052000	10948000	9982900	10615000	11165000	10279000	14179000	14838000	12679000	14473000	13559000	14562000	23087000	22717000	21014000	8273600	8457300	9479500	6721800	5747500	6058400	11791000	12355000	13225000	12664000	C03969	--
Rfmb319	130.09	84.08	129.079	C6H11NO2	[M+H]+	Pipecolic acid	Organic acids	Organic acids	4043-87-2	2	4454900	3885300	4930300	4485000	3838400	4184900	3972100	3756200	3522500	3601100	3378800	2933700	3619900	3357900	3490900	4232400	3278900	3899700	4447200	4197300	4365100	6824600	6121800	6425700	2308800	2530800	2378500	1436800	1219300	1874900	3084300	3636100	3453500	3256100	C00408	ko00310,ko00960,ko01100,ko01110
Zmgn000217	129.02	85.03	130.027	C5H6O4	[M-H]-	Methylenesuccinic acid	Organic acids	Organic acids	97-65-4	1	3508900	2995800	2762500	1882400	1611200	1777100	194950	191140	214550	204720	161970	216680	186950	265760	189490	2020700	1779700	1784000	2512400	2531400	2521700	570670	571840	656130	131700	190750	218710	115060	131710	78892	1181400	1085200	1032200	994040	C00490	ko00660,ko01100
mws0216	132.07	86	131.058	C5H9NO3	[M+H]+	Trans-4-Hydroxy-L-proline	Amino acids and derivatives	Amino acids and derivatives	51-35-4	3	1161700	1070700	965450	998150	1254700	997530	1908100	1894600	1723400	2177000	1417900	1332600	1551200	2343900	2024000	1463700	1415000	1612000	1271900	1465600	1461200	2154000	2301900	2375000	1525400	1530700	1434300	1033000	626470	1086500	1639900	1627800	1166800	1494600	C01157	ko00330,ko01100,ko02010
pmf0470	132.07	73	131.058	C5H9NO3	[M+H]+	cis-4-Hydroxy-D-proline	Amino acids and derivatives	Amino acids and derivatives	2584-71-6	3	7423100	6005800	5466900	7103300	8246400	6729200	1253900	1153400	984500	1144800	1516100	1050100	1571900	1072800	1325000	2808600	3223700	3291100	7101700	7007500	6712500	2097500	1045100	1565400	263940	368270	462540	243600	97893	158440	3922900	3276300	3336800	2472400	C03440	ko00330,ko01100
mws0712	130.05	86	131.058	C5H9NO3	[M-H]-	N-Propionylglycine	Amino acids and derivatives	Amino acids and derivatives	21709-90-0	3	890980	804490	774690	570090	536650	628330	123190	128190	123960	124460	107860	114660	88794	137040	92249	656480	570780	686110	864530	752270	807760	214510	229580	204050	85316	72626	77584	51565	47344	43306	441280	373950	380780	385350	--	--
mws0227	132.1	86.2	131.095	C6H13NO2	[M+H]+	L-Leucine*	Amino acids and derivatives	Amino acids and derivatives	61-90-5	1	3510300	3532500	2819200	4239800	3836100	3664700	7792300	7476600	7254900	8791800	8893300	6563200	8467300	7881500	7501800	2571700	3014200	2741600	3351100	2979300	3108800	5522000	5399700	6039500	3753100	4072600	4390000	4259100	3272800	3212100	4312800	4067200	5179300	6736000	C00123	ko00280,ko00290,ko00966,ko00970,ko01100,ko01110,ko01210,ko01230,ko02010
mws1587	132.1	86	131.095	C6H13NO2	[M+H]+	L-Norleucine*	Amino acids and derivatives	Amino acids and derivatives	327-57-1	1	7249400	7087200	8483600	7292400	5781000	6281600	17097000	20573000	20376000	23939000	18097000	17009000	19770000	18454000	20645000	8485500	8360900	8614300	8740200	8410300	8262100	10696000	10889000	9981400	8883800	10372000	10844000	6842100	6077500	5590300	10007000	9602900	12002000	11457000	C01933	--
pme2679	132	86	131.095	C6H13NO2	[M+H]+	L-Allo-isoleucine	Amino acids and derivatives	Amino acids and derivatives	1509-34-8	3	1006100	945980	836740	1073300	1339700	1123700	2126400	2033300	1815300	2059300	1896400	1672800	2262600	2444800	2154300	1585200	1213100	1379200	1566400	1666000	1373800	2217600	2609300	1839800	1175300	1023700	1231400	868160	788820	929040	1420500	1606900	1356300	1432400	C21096	--
pme0274	132.1	69	131.095	C6H13NO2	[M+H]+	6-Aminocaproic acid	Organic acids	Organic acids	60-32-2	2	811860	708010	692940	927290	839400	939240	1778100	1732600	1696600	2343300	1911500	1821800	2166900	1955700	1974200	736050	701660	726080	746620	851270	678250	1404200	1341000	1284100	851260	807710	963870	826140	790640	744110	997780	1002800	1183400	1046200	C02378	ko01100
mws0258	132.1	86	131.095	C6H13NO2	[M+H]+	L-Isoleucine*	Amino acids and derivatives	Amino acids and derivatives	73-32-5	1	6677500	6937200	8165100	6547200	6161800	6653500	17998000	20509000	19307000	22945000	18764000	16845000	20513000	19237000	20905000	8553000	8637200	8343500	8085200	8333400	8852400	11170000	10445000	9090400	9456700	10511000	10075000	6329300	5985100	5336700	10074000	9397500	11842000	11074000	C00407	ko00280,ko00290,ko00460,ko00960,ko00966,ko00970,ko01100,ko01110,ko01210,ko01230,ko02010
mws0473	131.03	87.05	132.042	C5H8O4	[M-H]-	2-Methylsuccinic acid	Organic acids	Organic acids	498-21-5	1	1211300	1122200	1124800	1038500	966060	963210	860810	858400	910320	768520	785610	806910	890360	1508000	878080	672050	636480	657950	750200	682710	646450	575090	622580	619690	544570	582510	549360	430180	466930	429280	823430	782530	732900	750210	--	--
Lmmn002164	131.03	87.05	132.042	C5H8O4	[M-H]-	Monomethyl succinate	Organic acids	Organic acids	3878-55-5	3	132730	131420	100570	117210	117150	119370	100370	109670	108890	98091	88104	91589	99787	177170	104420	62850	83741	73910	86069	81016	81944	80719	81348	80438	63809	73486	62483	46774	49568	49128	95898	84780	79868	87562	--	--
Lmmn000806	131.03	87.05	132.042	C5H8O4	[M-H]-	Dimethylmalonic acid	Organic acids	Organic acids	595-46-0	3	141190	129390	136310	123050	131680	111880	101830	98594	104460	85975	79914	101760	111970	133790	104780	80211	70020	87359	98063	81644	79925	67286	74056	64914	65643	64325	70674	48387	49290	44593	95119	94966	84600	70209	--	--
pme0243	131.03	87.05	132.042	C5H8O4	[M-H]-	Glutaric acid	Organic acids	Organic acids	110-94-1	1	1137400	1129200	1056400	996210	1001400	941370	806610	898680	837490	730880	743750	719210	904140	1302700	850370	638130	569900	594090	722510	638720	617250	599630	577130	535530	517530	540330	491460	409460	400870	392810	729780	689630	638200	663210	C00489	ko00071,ko00310,ko01100
Lmgn000160	131.05	70.03	132.053	C4H8N2O3	[M-H]-	3-Ureidopropionic Acid	Organic acids	Organic acids	462-88-4	1	1492700	1277200	1350900	1246400	1179800	1138800	973080	877980	927110	857920	825900	866450	1004500	1563100	999250	44985	36032	42248	108570	105390	93125	934010	644220	1103900	682840	592690	630560	850420	753300	732580	1098500	1031600	929730	773870	C02642	ko00240,ko00410,ko00770,ko01100
mws0001	133.06	74	132.054	C4H8N2O3	[M+H]+	L-Asparagine	Amino acids and derivatives	Amino acids and derivatives	70-47-3	1	35580000	36595000	29901000	32013000	35893000	27645000	24934000	25500000	25659000	33064000	28057000	9124900	23319000	26910000	25519000	1740600	1620400	2019700	4006600	3802800	2938700	19562000	22620000	20817000	12816000	12057000	12116000	11945000	4726900	10756000	29795000	29196000	23674000	20733000	C00152	ko00250,ko00460,ko00970,ko01100,ko01110,ko01230
mws0341	131.07	85	132.079	C6H12O3	[M-H]-	2-Hydroxyisocaproic acid	Organic acids	Organic acids	20312-37-2	1	12553	6743.7	12940	6755.4	10524	11829	8731.4	10676	16902	303.95	8566.5	12321	9395.3	23848	11161	15672	19180	16524	14481	8519.3	15000	6327.3	8284.1	4652.7	5497.2	8390.5	7370.9	17762	14209	13079	12509	8450.5	5606.2	10826	C03264	--
mws0972	131.07	85.07	132.079	C6H12O3	[M-H]-	6-Hydroxyhexanoic acid	Organic acids	Organic acids	1191-25-9	3	9	9	13753	9	9	10215	9	10935	9922.7	13051	9	9	9	9	9	9	4505.4	9	9	9	9	12672	17932	11323	14269	15539	20713	9824	12663	14893	21207	18850	18314	19740	C06103	--
Lmrn002746	131.07	85.07	132.079	C6H12O3	[M-H]-	2-Hydroxy-4-methylpentanoic acid	Organic acids	Organic acids	498-36-2	1	17465	12427	18305	18220	19264	23422	9601.1	11095	19263	19768	13302	10233	17644	21512	12001	11573	11578	8929.2	7624.5	6646.5	11952	11708	13239	9451	4940.2	5426.8	7940.2	12210	12377	8770.9	16130	8383.6	14562	9410.5	--	--
pme2527	133	116	132.09	C5H12N2O2	[M+H]+	L-Ornithine	Amino acids and derivatives	Amino acids and derivatives	70-26-8	3	35002	30915	33136	63728	49925	42208	41353	41183	9	9	9	9	9	9	9	43747	43530	50844	48828	48074	45311	59611	47793	56987	38440	34225	29704	12580	11270	13611	25930	29327	25819	25938	C00077	ko00220,ko00330,ko00472,ko00480,ko01100,ko01110,ko01210,ko01230,ko02010
MWS1882	132.03	88.04	133.038	C4H7NO4	[M-H]-	Iminodiacetic acid	Organic acids	Organic acids	142-73-4	2	186120	223010	161000	273310	281110	210220	267300	194700	218090	229620	186690	200700	186430	416780	190580	100990	106180	115500	125180	126060	118800	278210	257650	244630	168990	151170	170120	132580	146860	110770	205840	216220	214700	151330	C19911	--
mws0219	132.03	88	133.038	C4H7NO4	[M-H]-	L-Aspartic Acid	Amino acids and derivatives	Amino acids and derivatives	56-84-8	2	1816500	1755800	1660800	2101100	2316900	2055100	1791900	1564100	1987700	1565600	1665900	1450700	1844200	2521600	1895700	804820	752870	752160	1109500	919290	928640	2169600	1710500	1991900	1052800	1216300	1405100	1036900	980320	932860	1463200	1639700	1412200	1477900	C00049	ko00220,ko00250,ko00260,ko00261,ko00270,ko00300,ko00340,ko00410,ko00460,ko00710,ko00760,ko00770,ko00970,ko01100,ko01110,ko01200,ko01210,ko01230,ko01240,ko02010
Lmbn000198	133.01	71.01	134.022	C4H6O5	[M-H]-	3-Dehydro-L-Threonic Acid	Others	Saccharides and Alcohols	-	1	1830300	1800300	1871900	1317700	1300000	1386400	1501500	1622100	2617600	1360800	9	9	1199300	2288100	2109100	484320	386850	441260	487360	411890	306760	1410500	1487300	1544700	2261300	2012700	2241700	2594200	2588500	2578600	1888500	2128300	2153800	2182100	C03064	ko00053,ko01100
mws0275	133.01	71.01	134.022	C4H6O5	[M-H]-	L-Malic acid	Organic acids	Organic acids	97-67-6	1	347850	301820	303780	318140	270060	256800	148690	496940	1099700	728850	785550	637770	936770	1979500	1261100	42542	38285	48760	50353	53477	38849	399390	408100	316580	436770	484230	482340	589730	586730	545450	832190	760730	728180	819230	C00149	ko00020,ko00620,ko00630,ko00710,ko01100,ko01110,ko01200
Zmgn000503	133.05	71.01	134.058	C5H10O4	[M-H]-	2,3-Dihydroxy-3-Methylbutanoic Acid	Organic acids	Organic acids	1756-18-9	1	10591000	10585000	9429900	8798800	8166000	7882800	13407000	16980000	16080000	14032000	11125000	13985000	17685000	22204000	15588000	1247700	1147900	1242200	1695200	1669200	1762200	10079000	12881000	12981000	16380000	14293000	14921000	15015000	16525000	18300000	18459000	15968000	21341000	17487000	C04039	--
Zmdp000972	136.04	91.05	135.035	C4H9NO2S	[M+H]+	S-Methyl-L-cysteine	Amino acids and derivatives	Amino acids and derivatives	1187-84-4	2	181300	178470	154430	72415	49320	83775	25626	31308	27500	57770	48737	45143	34629	41734	47954	33648	45991	44976	37863	46361	44483	50996	63394	52218	23650	21540	28948	14650	7681.3	9687.4	63437	56471	59634	62474	C22040	ko02010
pme0040	136.06	119	135.054	C5H5N5	[M+H]+	Adenine	Nucleotides and derivatives	Nucleotides and derivatives	73-24-5	1	1432000	1366800	1405000	1761500	1473100	1630200	495180	520130	579150	564850	553090	463400	511410	488270	516260	1165200	1115200	1240600	1085900	1201700	1101800	1065400	1029300	1017900	1015400	1158900	1227200	820780	762500	838620	860110	969730	967260	1062300	C00147	ko00230,ko00908,ko01100
mws0889	135.03	75.01	136.037	C4H8O5	[M-H]-	D-Threonic Acid	Others	Saccharides and Alcohols	-	1	2305000	2354000	2351300	1610200	1592400	1397800	678330	572200	618120	570470	497710	391760	592590	869380	523250	17767000	13512000	13391000	9529200	10052000	10838000	818650	773540	756720	2055900	1981700	1956300	3266800	3007400	3063400	1201100	1322900	1201500	1149900	C21649	--
pme1173	137.05	110	136.039	C5H4N4O	[M+H]+	Allopurinol	Nucleotides and derivatives	Nucleotides and derivatives	315-30-0	3	5461.6	8461.4	6445	20531	14231	16724	243950	243160	263410	423410	421340	310710	312120	263700	278500	5562.3	6702.6	5853.8	7450.3	3853.9	4542.1	60918	82965	55701	105560	125040	101890	241780	139310	205550	108690	96648	109150	93836	--	--
pme0033	137.05	119	136.039	C5H4N4O	[M+H]+	Hypoxanthine	Nucleotides and derivatives	Nucleotides and derivatives	68-94-0	3	24275	21704	19069	22982	7787.7	19614	230860	219640	234380	420090	382890	338040	364870	239400	324220	11136	9758.7	9943.8	12738	14682	14526	72483	68038	67042	104790	121880	124110	214500	148960	213070	95011	116250	99224	107520	C00262	ko00230,ko01100
pme1002	138.09	103	137.084	C8H11NO	[M+H]+	L-Tyramine	Amino acids and derivatives	Amino acids and derivatives	51-67-2	3	1850100	2123100	2101000	864660	709890	773330	475260	488930	488960	498770	370510	355890	544950	516560	507420	429030	427240	395190	472970	405630	491440	303970	347310	302150	222430	199710	214490	73843	46778	52571	540270	470460	545760	536350	C00483	ko00350,ko00950,ko01100,ko01110,ko01240
pme2828	140	99	139.027	C6H5NO3	[M+H]+	4-Nitrophenol	Organic acids	Organic acids	100-02-7	3	6722900	6212000	5563300	5824400	6096300	5296700	9322800	10305000	10250000	10978000	9729000	10899000	8367200	10000000	9495900	4229500	3520800	3470900	3617000	4128100	4302900	8983300	8118500	8805900	5809500	7107500	5769600	4990000	5399900	4396800	8351700	8786300	8851500	8274900	C00870	--
MWSmce585	104.07	59.01	139.58	C4H10ClNO2	[M+H]+	Methyl 3-aminopropanoate (hydrochloride)	Amino acids and derivatives	Amino acids and derivatives	3196-73-4	3	998920	950350	976900	414740	347860	474320	73045	53307	65542	47891	66371	60103	60725	42295	49232	2367200	2123900	2567300	1954500	2208700	2197200	688920	661460	695850	686010	746440	653950	463760	462340	455660	923830	792900	808260	727090	--	--
pme3207	141.02	59	142.027	C6H6O4	[M-H]-	Muconic acid	Organic acids	Organic acids	1119-72-8	3	9	9	9	9	9	9	96828	60777	50394	113800	63942	105130	47151	163800	63942	726250	744770	853720	641590	537750	480590	1094600	1241900	1136700	2310700	2575400	2585000	1055000	1009700	1071200	330480	253050	368170	275990	C02480	ko01100
Hmsp000364	144.1	98.09	143.095	C7H13NO2	[M+H]+	L-Cyclopentylglycine	Amino acids and derivatives	Amino acids and derivatives	2521-84-8	3	203270	204820	198150	170750	150150	155320	115430	141230	107940	113960	106780	92115	87654	97422	88866	82268	91849	93886	79463	94560	113180	165760	182260	153000	48399	56871	55058	69040	52517	54947	89229	121140	133320	108560	--	--
mws0340	143.03	111	144.042	C6H8O4	[M-H]-	2,3-Dimethylsuccinic acid	Organic acids	Organic acids	13545-04-5	2	43399	33667	42518	36060	31514	41015	21815	21822	14959	21282	14405	20297	19109	41944	19301	10536	7857.8	12683	14835	9738.2	9	11817	21588	11779	5731.5	5915.6	7708.3	6172.4	4561.9	6660.4	37529	45705	49070	52485	--	--
mws0103	146.06	91	145.053	C9H7NO	[M+H]+	Indole-3-carboxaldehyde	Organic acids	Organic acids	487-89-8	1	49325	47200	49734	42251	40498	48143	8304.9	10125	10151	12162	11036	8915.1	8337.4	8195.3	9917	38764	33911	36750	44992	39519	41027	12583	16708	13327	8319.7	5245.9	7661.7	4110.5	6562.1	3606	20615	14892	18436	18336	C08493	--
pme0295	146.08	86	145.074	C6H11NO3	[M+H]+	4-Acetamidobutyric acid	Organic acids	Organic acids	3025-96-5	3	306840	239450	265190	144310	137540	144590	184890	154010	152460	134800	164140	140990	122670	141100	130150	655940	579510	511250	636370	582700	623780	90523	82565	116410	152190	124280	138530	163130	212330	192670	113820	84362	103880	127200	C02946	ko00330,ko01100
Lmqp000427	146.08	82.07	145.074	C6H11NO3	[M+H]+	N-Methyl-Trans-4-Hydroxy-L-Proline	Amino acids and derivatives	Amino acids and derivatives	4252-82-8	2	391780	488610	465640	718710	897760	493050	646510	738690	711950	665700	706500	506530	380200	1100800	457640	660800	621770	565620	820420	699760	693160	626380	1540500	781090	791850	892670	730590	1104000	620640	921920	610420	623420	636340	636240	--	--
mws0567	146.09	87	145.085	C5H11N3O2	[M+H]+	4-Guanidinobutyric acid	Organic acids	Organic acids	463-00-3	1	2837000	2870500	2403900	6568200	5251100	5368400	2315800	1855200	2297500	2264700	2000400	1880400	2406800	2340300	2063500	4138500	4841100	4730100	3351400	3831000	4015000	6340600	6344600	6811300	5868200	4836400	5596800	4404300	3118800	4665400	3099500	3274900	3207200	3390000	C01035	ko00330,ko01100
Lmgn000224	145.01	57.03	146.022	C5H6O5	[M-H]-	2-Methyl-3-oxosuccinic acid	Organic acids	Organic acids	-	2	8864.8	7898.5	8148.2	9	9	9	4119	9	2755.2	9014.8	10460	9905.2	9	5728	10399	25002	19280	11649	29979	20029	18930	20328	27315	34309	20542	23680	23722	27884	24349	14033	20332	16252	16508	7388	C06030	ko00660
pme2380	145.01	101	146.022	C5H6O5	[M-H]-	α-Ketoglutaric acid	Organic acids	Organic acids	328-50-7	3	104030	104430	106100	102030	110860	97655	264410	254600	188200	244560	304900	260070	173650	298900	149070	29329	53025	66196	94253	77738	90414	675190	773460	773360	1088900	969520	1012700	1213000	1339400	1428500	477350	421660	409620	469860	C00026	ko00020,ko00040,ko00053,ko00220,ko00250,ko00300,ko00310,ko00340,ko00430,ko00630,ko00650,ko00660,ko01100,ko01110,ko01200,ko01210,ko01230,ko01240
mws0208	145.05	101	146.058	C6H10O4	[M-H]-	Adipic Acid	Organic acids	Organic acids	124-04-9	3	277660	297180	297060	207700	171130	140270	150510	94645	91230	107730	97868	94228	81645	163000	89240	133210	138350	117170	154230	146570	155430	119900	133790	107820	90209	128290	122160	85212	81448	54521	149200	144040	132280	118980	C06104	ko01100
Wmzn000227	145.06	109.04	146.058	C6H10O4	[M-H]-	2,2-Dimethylsuccinic acid	Organic acids	Organic acids	597-43-3	3	9	9	9	3552.2	7682.5	9	9	11816	9	9	9	2948.5	9	4125.8	4761.8	9	5925.5	9	2975.2	4218	6097.5	11905	10048	14298	5335.2	4136.5	8260	4762.5	4741.2	5907.8	4783.5	3530.8	5319.5	5987.2	--	--
mws0924	145.05	101	146.058	C6H10O4	[M-H]-	2-Methylglutaric acid	Organic acids	Organic acids	617-62-9	3	53672	29162	25631	15668	21409	31784	27257	43013	24247	18926	21822	18297	37759	49495	34340	7902.7	13472	22168	11846	9431.9	17259	13708	25656	8191.1	4183.3	14489	8987.6	11214	18881	9923	20435	30077	25105	13151	--	--
pme0193	147.08	84	146.069	C5H10N2O3	[M+H]+	L-Glutamine	Amino acids and derivatives	Amino acids and derivatives	56-85-9	2	647780	586010	585600	973880	893890	817460	769890	744640	824670	1203200	1216400	1031700	1008500	937500	920490	1186000	1169800	1197800	925700	901290	839650	1062900	930780	972040	640450	661930	646080	744460	715630	676680	863250	804170	861600	788730	C00064	ko00220,ko00230,ko00240,ko00250,ko00630,ko00750,ko00910,ko00970,ko01100,ko01230,ko01240,ko02010
pme0026	147.11	84	146.106	C6H14N2O2	[M+H]+	L-Lysine	Amino acids and derivatives	Amino acids and derivatives	56-87-1	2	658470	659880	670300	1020200	1003400	870950	823390	745120	856320	1155400	1181300	1132300	962000	1014000	1004900	1186400	1178400	1270600	925170	962930	920470	1092100	990350	951720	723420	668360	658400	721740	641290	716760	944390	989610	882520	913010	C00047	ko00300,ko00310,ko00780,ko00960,ko00970,ko01100,ko01110,ko01210,ko01230,ko02010
mws1050	148.06	88	147.053	C5H9NO4	[M+H]+	O-Acetylserine	Amino acids and derivatives	Amino acids and derivatives	5147-00-2	3	153430	141280	182890	212170	205960	201080	53150	62905	70389	90403	48429	59718	36475	52087	48099	90834	88989	88025	72072	69767	67413	100830	184340	124730	117800	130970	131040	97766	90520	111540	163370	153000	132970	144700	C00979	ko00270,ko00908,ko00920,ko01100,ko01110,ko01200,ko01230,ko04122
Zmzn000113	146.05	102.06	147.053	C5H9NO4	[M-H]-	L-threo-3-Methylaspartate	Amino acids and derivatives	Amino acids and derivatives	6061-13-8	1	223790	219130	226540	294750	330250	282310	410760	365830	438600	492180	354750	406380	307070	542830	363030	160890	150230	130260	180000	184440	211030	406650	454250	535500	385680	363500	347250	412630	367360	418160	384070	273240	333040	311340	C03618	ko00630,ko00660,ko01100,ko01200
pme0014	148.06	84	147.053	C5H9NO4	[M+H]+	L-Glutamic acid	Amino acids and derivatives	Amino acids and derivatives	56-86-0	3	7290600	4882100	6900400	7890900	5068300	6423500	7516700	8146100	8306300	9767400	10174000	5109100	5747100	5068800	6801700	7934600	7333300	7410900	5362400	6066800	6802200	11775000	13124000	11482000	7206500	6321200	7378500	6365100	4077700	5785000	8157800	7129700	5356400	7338000	C00025	ko00220,ko00250,ko00330,ko00332,ko00340,ko00430,ko00480,ko00524,ko00630,ko00650,ko00660,ko00860,ko00910,ko00970,ko01100,ko01110,ko01200,ko01210,ko01230,ko01240,ko02010
MWSmce608	148.1	74.02	147.17	C6H13NO3	[M+H]+	4-Hydroxyisoleucine	Amino acids and derivatives	Amino acids and derivatives	781658-23-9	3	54439	45648	52110	74536	59218	69664	59309	105310	81888	68722	71230	69485	45321	36602	74615	30500	44103	50553	59504	39554	51569	77020	101000	116910	58546	66823	105720	84233	54975	38060	47085	94758	58011	64866	--	--
Zmyn000247	147.03	57.03	148.037	C5H8O5	[M-H]-	2-Hydroxyglutaric Acid	Organic acids	Organic acids	13095-48-2	1	18261	18092	22006	57436	28613	74948	62261	89694	68143	56771	75923	59154	9	69859	68037	9	8108.2	9	9	9	8337.3	35522	41500	61064	24230	29085	19450	24840	77794	11367	57922	43211	53101	57527	C03196	ko00310,ko01100
Zmyn000230	147.03	57.03	148.037	C5H8O5	[M-H]-	2-Dehydro-3-deoxy-L-arabinonate	Others	Saccharides and Alcohols	-	1	11494	17132	60940	38750	139960	126980	217680	79746	151650	216500	132830	171970	143350	268050	75019	9	8670.5	11404	9	9	9152	58555	125200	80360	36837	115240	87990	98839	121340	87975	151010	139400	50595	114620	C00684	ko00053,ko01100
MWS3036	147.03	85.03	148.037	C5H8O5	[M-H]-	3-Hydroxyglutaric acid	Organic acids	Organic acids	638-18-6	2	9	25448	21746	60539	70228	83398	123260	247160	118850	70797	110250	128770	93078	141450	102420	16383	8965.8	8685.2	9278.9	4906.9	16089	67259	92230	104120	58537	63263	67714	53761	41222	53699	107140	73377	90868	56467	--	--
Lmbn000216	147.03	57.03	148.037	C5H8O5	[M-H]-	3-Methylmalic acid	Organic acids	Organic acids	152204-30-3	1	23540	29849	9	65677	25881	57647	100340	60748	208100	138150	52533	50680	61277	179090	43177	22850	20621	9	9	4921.9	17046	46366	144200	58814	38473	10168	16168	72147	45814	68600	51529	105600	51635	58796	C06032	ko00290,ko00660,ko01100,ko01210,ko01230
pmb2826	147.03	87.1	148.037	C5H8O5	[M-H]-	L-Citramalic acid	Organic acids	Organic acids	-	1	231820	91440	110710	154530	158580	122310	75893	107040	81942	73702	40642	66851	161650	164820	169980	28561	57995	45143	19323	20694	45718	74278	68279	108670	158710	182900	101770	147130	142250	79767	83202	70184	91228	147910	C02614	ko00660,ko01100
ML10171848	147.03	85.03	148.037	C5H8O5	[M-H]-	D-Arabinono-1,4-lactone	Others	Saccharides and Alcohols	-	1	61056	41174	52989	98208	85889	50800	329740	224850	196050	199920	174120	255140	231970	370860	209840	19041	11209	18793	17592	16275	9443.5	74926	80266	47637	80988	74530	60526	93416	111660	78857	85893	66883	77222	76688	C00652	ko00053
mws2213	147.05	77.01	148.052	C9H8O2	[M-H]-	cinnamic acid	Organic acids	Organic acids	140-10-3	1	3361.5	3641.4	3686.1	6177.3	5469	6517.4	122130	120800	115000	113190	111220	124930	198270	287000	198760	5371.4	4668.3	4009.3	4810.1	7055.7	4799.8	22998	23673	19396	108420	101320	105440	33720	36449	33909	62084	52448	46429	47954	C00423	ko00130,ko00360,ko00940,ko00998,ko01100,ko01110
pme3154	147.07	59.01	148.074	C6H12O4	[M-H]-	Mevalonic acid	Organic acids	Organic acids	150-97-0	3	141340	152060	114960	9	9	9	472330	532130	515670	482860	416530	437560	505000	999700	469400	9	9	9	9	9	9	9	9	9	9	9	9	9	9	9	104290	136800	106780	132260	C00418	ko00900,ko01100,ko01110
pme1210	150.06	61	149.051	C5H11NO2S	[M+H]+	L-Methionine	Amino acids and derivatives	Amino acids and derivatives	63-68-3	1	68564	63871	57153	70157	59685	76034	79895	68557	75466	142190	94323	96358	85066	78863	103760	97145	94567	99484	95467	103490	111190	221580	212650	208460	90458	91322	86841	78495	53095	74133	89474	90440	93688	85964	C00073	ko00270,ko00966,ko00970,ko01100,ko01110,ko01210,ko01230,ko01240
mws1499	149.05	59.01	150.053	C5H10O5	[M-H]-	D-Arabinose*	Others	Saccharides and Alcohols	10323-20-3	2	225460	247200	212520	322620	292140	314100	91622	84975	85736	105750	67494	78692	64299	101990	67888	176410	219740	242070	235950	242750	241100	136720	112370	137590	87137	94789	108360	91807	56641	71902	156250	102780	149880	154700	C00216	ko00040,ko00053
Zmgn000173	149.05	75.01	150.053	C5H10O5	[M-H]-	D-Ribose*	Others	Saccharides and Alcohols	50-69-1	2	183780	194430	213480	330500	306310	357070	28786	31628	28986	20530	28967	26107	30726	41728	33598	56154	78848	60892	123280	88816	115470	34982	40580	61084	43404	17670	19524	13797	54122	28425	71604	59367	53719	58474	C00121	ko00030,ko01100,ko02010
pmf0420	149.06	74.9	150.068	C9H10O2	[M-H]-	Benzyl acetate	Organic acids	Organic acids	140-11-4	3	175170	269070	249120	305860	308490	271600	453700	421550	453440	482620	479780	455510	433090	713230	497790	352820	279270	291630	317810	306140	308300	347090	341900	464850	330540	396680	368980	416960	399290	361490	239790	223420	231910	229010	C15513	--
mws0008	149.06	105	150.068	C9H10O2	[M-H]-	Hydrocinnamic acid	Organic acids	Organic acids	501-52-0	3	9	9	9	9	9	9	98663	94746	87174	106250	113180	111300	140690	189710	144630	9	9	9	9	9	9	9	9	9	54696	49030	53204	9	9	9	39827	36856	33933	32888	C05629	ko00360,ko01100
MWSmce199	149.05	59.02	150.13	C5H10O5	[M-H]-	L-Xylose*	Others	Saccharides and Alcohols	609-06-3	2	228050	217610	218580	317600	292310	343490	96732	78652	87891	98599	89923	113340	80534	101410	77693	186230	214950	246690	237290	247970	250480	139370	117180	131050	93572	94242	99337	81418	79553	67276	177800	146930	109780	121560	C01510	--
pme1109	152.06	135	151.049	C5H5N5O	[M+H]+	Guanine*	Nucleotides and derivatives	Nucleotides and derivatives	73-40-5	1	3209900	2875800	2568500	7800500	6866400	8667600	1252900	1289700	1425800	2451500	2124900	1587000	3067100	2602200	3083600	3018100	3123200	3290300	3140900	3486800	3627700	3385100	3387600	3365400	1116500	1356700	1282500	907060	635360	869240	2610700	2694700	2933000	2918300	C00242	ko00230,ko01100
pme0183	152.06	135	151.049	C5H5N5O	[M+H]+	Isoguanine*	Nucleotides and derivatives	Nucleotides and derivatives	3373-53-3	3	142900	141200	160950	629820	586310	560330	61649	65935	75656	105770	107640	98145	128770	113830	121370	305150	289690	312670	237750	267320	264110	213710	242830	269990	65052	48176	69600	28515	28311	32323	153500	139550	166030	156160	--	--
pme0256	151.03	151	152.033	C5H4N4O2	[M-H]-	Xanthine	Nucleotides and derivatives	Nucleotides and derivatives	69-89-6	1	32216	21935	16644	26881	20158	42355	451600	366880	327260	86876	183220	559650	493940	227740	249250	68472	46063	72238	32918	37572	45029	242250	505830	435570	1048900	637110	447130	1073800	1348000	1658300	180300	126900	265120	320550	C00385	ko00230,ko00232,ko01100,ko01110
MWS2984	153.05	136.03	152.045	C4H4N6O	[M+H]+	8-Azaguanine	Nucleotides and derivatives	Nucleotides and derivatives	134-58-7	2	320420	285200	259490	868250	644510	874930	1320800	1225100	1161900	1905800	1755900	1065200	2337100	1451100	1792700	382230	382590	386330	497710	492290	415340	927180	817880	818680	1668800	1930500	2309600	4409000	2773700	3800100	915170	894280	1419200	992090	--	--
mws0458	151.04	136	152.047	C8H8O3	[M-H]-	Vanillin	Organic acids	Organic acids	121-33-5	3	41389	32562	32158	28010	25656	27996	19772	26437	26102	26703	27843	22522	21983	27830	23902	34368	20301	20580	17333	29580	17016	23088	21888	15281	25203	20298	18774	63014	50840	41467	47976	38521	44115	46606	C00755	ko00998,ko01100,ko01110
MWS1962	153.13	83.05	152.12	C10H16O	[M+H]+	cis-Citral	Organic acids	Organic acids	5392-40-5	3	257880	243950	284470	178160	179110	206500	181880	165290	141140	125460	132700	118190	174540	154170	125050	78076	73095	76047	114450	103930	89197	107230	125970	100580	108650	76926	106230	103590	92561	102680	128900	132160	114870	104270	C09847	ko01110
mws0180	153.02	109.03	154.027	C7H6O4	[M-H]-	2,5-Dihydroxybenzoic Acid; Gentisic Acid*	Organic acids	Organic acids	490-79-9	3	34304	32664	29318	35395	35798	40399	10858	28877	9	15751	19786	17194	9	40035	9	48032	26806	26019	29546	9	40755	34868	14226	18310	23048	18817	24922	21871	33990	14067	24300	29608	28632	33279	C00628	ko00350,ko01100
mws0183	153.02	109.03	154.027	C7H6O4	[M-H]-	3,4-Dihydroxybenzoic Acid (Protocatechuic acid)*	Organic acids	Organic acids	99-50-3	3	115390	117440	128700	139810	171030	136530	44081	45768	52049	43994	35981	26423	48788	59676	36883	146260	146470	148040	144020	257430	214170	67332	73968	70641	50030	74913	51435	42992	67771	24067	96994	102170	91187	90423	C00230	ko01100,ko01110
Jmwp002208	155.07	91.05	154.063	C8H10O3	[M+H]+	3,4-dihydroxy phenylethanol	Organic acids	Organic acids	-	2	45913	46350	46036	42095	48105	41568	25760	30812	30975	22144	27777	29236	28112	29678	22985	44535	36919	36969	38232	33197	36620	36045	32419	28106	32262	32203	29022	18485	12866	20210	43729	44408	30765	40569	--	--
MWSslk102	155.01	119.04	154.56	C5H3ClN4	[M+H]+	6-Chloropurine	Nucleotides and derivatives	Nucleotides and derivatives	87-42-3	3	14287	16008	20530	19791	17565	16001	19753	19768	19123	13395	22648	17889	16875	19558	21968	15052	19744	20208	15124	16187	20171	15609	19005	18673	19739	22173	17134	15913	14989	17129	16646	21470	14542	15497	--	--
mws0254	156.08	110	155.069	C6H9N3O2	[M+H]+	L-Histidine	Amino acids and derivatives	Amino acids and derivatives	71-00-1	3	539180	522410	491260	171450	194350	175070	811340	801310	812150	810800	802880	872590	1220500	1093100	1272500	65768	71111	85034	60528	83558	64455	2283400	2152900	2049400	670420	769340	761290	712490	791950	864010	754940	780960	739320	743190	C00135	ko00340,ko00410,ko00970,ko01100,ko01110,ko01230,ko02010
pme2165	155.01	111	156.017	C5H4N2O4	[M-H]-	Orotic acid	Others	Vitamin	65-86-1	3	20726	13097	11526	40898	46486	49790	40574	28448	33567	32580	53984	35164	35537	42944	35426	11632	9	13319	9	9	9	38103	33018	49838	59112	56279	58999	21470	16995	27900	32910	32723	28957	22381	C00295	ko00240,ko01100,ko01240
pmf0175	157.16	157.2	158.167	C10H22O	[M-H]-	2-Decanol*	Others	Saccharides and Alcohols	1120-06-5	3	1073500	1115700	1045500	1145500	1130400	1108700	912210	906130	955320	948630	948260	986000	916550	1199800	956780	1033000	959400	917370	931140	951300	929490	757650	747690	763980	756940	755160	743300	760750	724040	739310	1009100	986950	947320	930790	--	--
pmf0174	157.16	157.2	158.167	C10H22O	[M-H]-	1-Decanol*	Others	Saccharides and Alcohols	112-30-1	3	1191100	1186500	1108200	1173100	1124200	1138800	923120	972180	935090	1016100	989500	1056500	1034500	1295600	980920	1041800	981490	1010400	961720	1010800	922080	733620	771960	783140	747940	785210	779930	763760	770750	773990	1060000	1037800	991430	994340	C01633	--
MWS0559	161.05	71.01	162.053	C6H10O5	[M-H]-	1,6-anhydro-β-D-glucose	Others	Saccharides and Alcohols	498-07-7	3	458800	395230	378030	479240	445000	532760	137610	132690	104820	118080	119880	144980	112470	119030	102430	577550	360710	386140	544200	535120	595960	227400	235960	293760	262790	184030	258920	155140	181030	204550	267690	235960	260110	208320	--	--
pme2914	161.05	99	162.053	C6H10O5	[M-H]-	3-Hydroxy-3-methylpentane-1,5-dioic acid	Amino acids and derivatives	Amino acids and derivatives	503-49-1	1	1154600	1248800	1241900	1034700	938550	882540	1120400	1195800	1115100	941030	1056100	1009700	860630	1112800	850340	1100200	919550	1188800	1242100	1240300	1292400	2000900	1990900	1744800	1379700	1370600	1458700	1098600	1266000	1105400	1230000	1113000	1168000	1252100	C03761	--
pmf0440	163.08	91.1	162.068	C10H10O2	[M+H]+	4-Methoxycinnamaldehyde	Organic acids	Organic acids	1963-36-6	2	20882	27857	25244	33547	32040	31444	26596	32090	29676	31240	25282	25520	28149	28660	37168	31938	33209	34387	36026	37000	42084	35751	36263	35353	31780	32424	31810	30895	33447	29030	18152	19200	17689	19476	C10475	--
pme2758	162.04	144	163.048	C5H9NO5	[M-H]-	4-Hydroxy-L-glutamic acid	Amino acids and derivatives	Amino acids and derivatives	3913-68-6	3	9543	14905	6349.2	23155	28838	12073	35868	33029	47094	39280	21528	36430	36250	42860	23440	12417	9	11054	12402	9	9	15846	9	9	22852	24060	18175	25223	25277	21224	24717	27160	15246	20582	C03079	--
pme1419	164.07	104	163.067	C6H13NO2S	[M+H]+	L-Methionine methyl ester	Amino acids and derivatives	Amino acids and derivatives	10332-17-9	3	25324	23862	22119	17051	19196	23525	13921	11525	14669	15489	17400	16407	13500	14387	12184	20043	21740	22766	27728	22941	20399	12142	16565	11214	10843	7878.6	10625	6514.3	8852.4	6822.6	16908	16540	10487	14951	--	--
pme1439	165.05	119	164.047	C9H8O3	[M+H]+	p-Coumaric acid	Organic acids	Organic acids	501-98-4	1	15150	16709	20570	13067	13402	13718	9480.5	15874	13507	12668	13671	9419.9	21497	16444	17927	15889	21278	15103	13037	9015	12878	23097	19973	15426	33124	26908	25722	125560	121750	136050	23672	26168	24509	22369	C00811	ko00130,ko00350,ko00940,ko00950,ko00998,ko01100,ko01110
Lmbn002648	163.04	119.05	164.047	C9H8O3	[M-H]-	α-Hydroxycinnamic acid	Organic acids	Organic acids	5801-57-0	2	89065	100320	84678	55054	45561	50428	17830	21291	19132	26538	28340	27391	24967	29315	24846	34617	38613	38580	29090	23465	25841	29233	28076	26594	30809	26713	30457	18234	17726	16409	59272	54145	52369	43825	C02763	ko00360,ko01100
MWSCX015	165.05	91.05	164.047	C9H8O3	[M+H]+	(E)-3-(3,4-dihydroxyphenyl)acrylaldehyde	Organic acids	Organic acids	-	1	44167	51964	53791	42183	31111	36614	24444	25029	28663	21051	28358	18716	33833	20766	35447	43941	50597	51880	40211	36984	29302	46842	44379	49397	46694	48887	46956	232190	210190	242260	52371	51850	47836	49216	C10945	ko00940,ko01110
pme2435	163	59	164.068	C6H12O5	[M-H]-	L-Fucose	Others	Saccharides and Alcohols	2438-80-4	3	282090	249910	232040	297260	340980	473160	48838	45443	52087	55820	50343	37951	30457	57936	34726	630670	776750	688040	565170	532150	493190	252100	177340	208970	114140	104710	82934	70895	82660	56828	211240	151060	202090	146280	C01019	ko00051,ko00520,ko01100
mws0854	163	59.01	164.068	C6H12O5	[M-H]-	Rhamnose	Others	Saccharides and Alcohols	3615-41-6	3	249370	227640	183800	444280	416260	342930	46041	36224	60609	48879	45806	46192	40048	59464	39130	795600	705030	699240	493710	619820	442450	150000	189130	174430	103030	93637	97476	73722	69638	57796	149820	160020	166090	132300	C00507	ko00051,ko01100
MWS5238	165.09	91.05	164.084	C10H12O2	[M+H]+	4-PHENYLBUTYRIC ACID	Organic acids	Organic acids	1821-12-1	2	60326	70979	63870	28934	26888	29362	9	9	9	9	9	9	9	9	3353.9	59161	66030	65330	41795	49165	51033	6480.8	3534.5	4559	9	9	9	9	9	9	23869	24151	23518	22590	--	--
pme2617	166.05	102	165.046	C5H11NO3S	[M+H]+	L-Methionine Sulfoxide	Amino acids and derivatives	Amino acids and derivatives	3226-65-1	3	723790	682630	676480	705730	675090	662000	576080	584140	609960	683490	614480	616300	563810	690890	593880	642760	665500	637190	565170	581610	570960	660300	651620	630630	642940	765690	634600	687280	685240	586900	568930	630030	681560	669400	C02989	ko00270
pme0021	166.09	120.08	165.07	C9H11NO2	[M+H]+	L-Phenylalanine	Amino acids and derivatives	Amino acids and derivatives	63-91-2	1	24138000	23724000	23104000	16328000	14955000	16197000	24347000	24713000	23546000	23106000	20760000	20830000	27554000	27371000	26181000	13432000	13378000	12783000	12777000	12608000	12649000	17043000	16102000	14752000	9309700	9348000	8932800	4580200	4545500	4093700	16656000	16363000	15353000	16664000	C00079	ko00360,ko00400,ko00460,ko00940,ko00960,ko00966,ko00970,ko00998,ko01100,ko01110,ko01210,ko01230,ko02010
pmc0274	167.1	121.1	166.031	C6H6N4S	[M+H]+	6-Methylmercaptopurine	Nucleotides and derivatives	Nucleotides and derivatives	50-66-8	3	1584500	1601900	1565100	1138600	1005600	1133400	1669500	1773700	1743800	1658100	1548900	1581300	2001100	1947200	2048600	879740	848080	881960	833630	832110	857230	1167800	1218000	1110700	659210	657770	628520	351020	355650	339370	1212100	1135300	1107100	1161400	C16614	--
mws0344	165.04	75	166.048	C5H10O6	[M-H]-	D-Xylonic acid	Others	Saccharides and Alcohols	526-91-0	1	1024900	1028600	1031700	573400	692170	394680	9	9	9	9	7696.8	41384	73919	128830	112580	466220	397920	410370	367000	736710	513420	738470	258970	243960	871780	1065000	677100	644290	352050	321260	883260	931030	826120	403000	C00502	ko00040,ko01100
Lmbn005172	165.06	119.05	166.063	C9H10O3	[M-H]-	2,6-Dimethoxybenzaldehyde	Organic acids	Organic acids	3392-97-0	2	20669	23325	16676	19973	19797	21910	95853	107630	101530	117730	122580	112660	157040	188670	125630	21231	20169	18970	13154	12167	11077	46065	49570	45398	550070	579770	532330	354680	348560	366250	123460	113640	118860	114180	--	--
MWS1830	167.07	121.03	166.063	C9H10O3	[M+H]+	Ethylsalicylate	Organic acids	Organic acids	118-61-6	3	18655	21522	14756	13827	14917	14094	4265	6731.6	8239.7	6564	5581.7	6351.2	7704.1	8678.9	2219.2	15671	13204	15239	6810.8	10745	12449	13126	11163	13480	11347	8567.9	5211.6	6325.5	5348.5	3806.2	9748.7	7515.7	11337	11406	--	--
mws0467	165.06	119.05	166.063	C9H10O3	[M-H]-	3-(4-Hydroxyphenyl)-propionic acid	Organic acids	Organic acids	501-97-3	3	9	9	9	1205.8	3765.3	2761	42241	34975	30575	39430	39240	29499	44809	71190	42390	7748.4	6343.9	8412.4	3970.7	3076.9	4818.2	8006.3	10626	8160.9	69374	78779	111050	57194	67572	66025	22432	30255	29470	36212	C01744	--
Lmrn003000	165.06	103.06	166.063	C9H10O3	[M-H]-	2-Hydroxy-3-phenylpropanoic acid	Organic acids	Organic acids	7326-19-4	1	18170	20485	18056	20162	21014	18117	90479	106400	95813	106380	98875	108170	142640	163510	147440	14075	18405	15797	11546	9744.1	9576.7	48997	41176	44860	499500	589020	543390	378880	337110	341250	113250	109210	111010	126240	C05607	ko00360,ko00960,ko01100
mws0851	143.11	143.11	166.097	C8H15NaO2	[M-Na]-	Sodium Valproate	Organic acids	Organic acids	1069-66-5	2	286150	241190	298230	369130	324860	304890	245140	223010	235850	243900	205370	255510	251050	303270	238710	309740	285830	292060	266180	319400	328500	266230	270220	255610	293000	286340	256450	161980	196800	197910	315660	265440	218930	244230	--	--
MWSmce583	165.02	91.02	166.13	C8H6O4	[M-H]-	Piperonylic acid	Organic acids	Organic acids	94-53-1	3	93629	140690	136660	184210	170380	172140	286150	291340	244210	274900	297180	301170	276260	411160	271610	198140	159550	149320	186540	197390	143140	196640	176000	228560	202060	201630	206540	265340	225070	211990	147550	144320	143540	145360	--	--
MWSmce165	165.08	59.02	166.17	C6H14O5	[M-H]-	L-Fucitol	Others	Saccharides and Alcohols	13074-06-1	2	249630	265150	212230	368850	298740	376240	255340	225040	263820	251090	247260	264950	213530	311900	203530	160060	108630	91236	113130	135940	99001	191630	145360	201850	245630	196490	191040	176360	173740	159410	258360	217310	242470	221770	--	--
Zmjp000624	168.06	150.05	167.058	C8H9NO3	[M+H]+	Pyridoxal	Others	Vitamin	66-72-8	2	21004	21747	20207	49112	33929	52702	30930	31511	26477	35753	28832	22759	26841	20510	27558	62737	71874	61275	52754	60205	58647	64267	45409	43074	42956	47088	44946	42608	40192	35992	39560	42190	39542	36738	C00250	ko00750,ko01100,ko01240
mws2125	166.98	78.7	167.982	C3H5O6P	[M-H]-	Phosphoenolpyruvate	Organic acids	Organic acids	138-08-9	3	34344	17606	27729	53958	44986	67436	30451	28495	27206	54283	39220	26261	34300	63157	27232	70260	30149	58607	43339	37066	67707	93800	107390	98163	81733	73941	82155	84133	75354	120430	47392	55136	70060	63518	C00074	ko00010,ko00020,ko00400,ko00440,ko00620,ko00710,ko00998,ko01100,ko01110,ko01200,ko01230,ko01240
Hmbp001276	169.05	65.03	168.042	C8H8O4	[M+H]+	Gallacetophenone	Organic acids	Organic acids	528-21-2	2	13506	20871	11806	12070	12570	15193	51436	42738	39979	40321	39743	32247	65113	59252	57757	9241.6	11287	19355	11658	11497	9373.4	65247	55291	59277	266100	233090	278720	95859	68402	78055	45221	59712	45018	37169	--	--
pme1383	170.08	134.1	169.074	C8H11NO3	[M+H]+	Pyridoxine	Others	Vitamin	65-23-6	2	139220	128200	135720	175480	192870	198740	148130	185650	188260	269450	242790	183540	177880	166050	198400	125960	117620	147730	191890	207230	203880	223590	175510	214660	215340	256460	267000	243480	227390	248470	180800	181050	215320	196790	C00314	ko00750,ko01100,ko01240
Zmzn000078	168.99	78.96	169.998	C3H7O6P	[M-H]-	Dihydroxyacetone phosphate	Others	Saccharides and Alcohols	-	3	344900	403070	355370	1463900	1264900	1299800	761630	558030	767390	625180	605350	568600	673210	752290	547500	89834	57239	51833	39323	40855	46951	1043800	1255900	1195400	701360	612900	809150	573910	690700	623090	537960	631740	538280	867200	C00111	ko00010,ko00040,ko00051,ko00052,ko00561,ko00562,ko00564,ko00640,ko00710,ko00760,ko01100,ko01110,ko01200,ko01230
pme3186	169	79	169.998	C3H7O6P	[M-H]-	DL-Glyceraldehyde-3-phosphate	Organic acids	Organic acids	591-59-3	3	62042	66408	52035	219350	223560	180500	111800	156800	184590	126720	128560	79407	153140	195310	192990	60856	57972	39988	41999	35148	17277	467520	397320	402100	417430	507090	450730	386180	446330	400110	220130	248170	208170	181410	C00661	--
MWS20192	171.03	107.01	170.022	C7H6O5	[M+H]+	Gallic acid	Organic acids	Organic acids	149-91-7	3	2040.1	8241.9	11358	10506	13276	10803	15316	9731	8676.1	11705	10872	12830	12842	11340	5494.7	9890.2	9656.5	13560	9608.7	13219	11288	6082.5	11712	7547.2	1849.4	6170	3895.9	2996.3	5971.4	9	7494.9	8432.9	12211	9414.5	C01424	--
MWSmce609	134.04	74.02	171.16	C4H5CaNO4	[M+H]+	Aspartic acid (calcium)	Amino acids and derivatives	Amino acids and derivatives	10389-09-0	2	786360	545600	838860	1584500	1156600	1267700	756440	745810	735710	819310	789530	389710	711860	631680	646330	557440	634990	531720	423740	383150	591740	982800	767690	843970	716620	513960	583480	519570	143090	412270	1007700	759750	768020	990790	--	--
pme0253	174.11	86	173.105	C8H15NO3	[M+H]+	N-Acetyl-L-leucine	Amino acids and derivatives	Amino acids and derivatives	1188-21-2	3	18350	18240	19002	12809	10318	12639	6758.3	7184.5	7342.6	8497.8	8760.8	7126.7	5255	4754.9	6006	8025.1	8155.7	5556.3	8593	6001.2	6458.3	5397.9	7320.2	2686.6	3556.7	3351.8	3162.5	3052.4	4324.8	3161.4	8949.6	8236.1	9741.3	6267.9	C02710	--
pme3009	175.02	99	174.016	C6H6O6	[M+H]+	Trans-Citridic acid	Organic acids	Organic acids	4023-65-8	3	57650	34402	52826	46721	51675	46474	134000	133410	151650	146660	130030	152740	124730	127780	135120	25175	26269	9	9	9	29322	101760	108030	110060	54446	51520	37693	34228	31506	27609	94044	81312	62027	75449	C02341	ko00660,ko01100
MA10039492	173.01	71.03	174.016	C6H6O6	[M-H]-	Dehydroascorbic acid	Others	Vitamin	490-83-5	2	1485800	971940	1343300	877980	998240	991730	106590	68740	88114	98037	57934	112380	130000	182330	76681	539240	1092100	1192900	599460	1305800	924090	350080	385420	378520	287190	239310	280460	88392	101550	190870	343100	432750	344780	407200	C05422	ko00053,ko00480,ko01100
mws0154	173.05	93	174.053	C7H10O5	[M-H]-	Shikimic acid	Organic acids	Organic acids	138-59-0	3	14843	27366	22519	28400	33905	22878	17613	23418	19391	19540	18104	24092	21200	30730	32467	89296	93725	85635	130510	111830	133350	61916	56474	63453	59336	50612	38461	32917	41362	59851	67858	33262	49911	52614	C00493	ko00400,ko01100,ko01110,ko01230,ko01240
mws0242	173.08	111	174.089	C8H14O4	[M-H]-	Suberic Acid	Organic acids	Organic acids	505-48-6	2	28627	29908	21833	13055	13837	11382	11974	6657.7	9	11934	7613.8	9	8694.3	7980	9	22247	21931	17960	15311	19801	14696	11617	13334	9435.5	8503.6	6823.5	8059.3	11302	9	9	14629	17182	13598	14105	C08278	--
Zmyn000155	173.11	131.08	174.1	C7H14N2O3	[M-H]-	N-α-Acetyl-L-ornithine	Amino acids and derivatives	Amino acids and derivatives	-	2	131660	146410	131470	53990	67402	74210	230010	238380	188740	380510	387190	283180	233830	369130	270500	9223.5	11471	9729.8	21752	21046	24880	348520	281280	325920	168090	137110	135760	8671.2	19140	15071	212970	266060	192210	205000	C00437	ko00220,ko01100,ko01110,ko01210,ko01230
mws0260	175.12	116	174.112	C6H14N4O2	[M+H]+	L-Arginine	Amino acids and derivatives	Amino acids and derivatives	74-79-3	1	1152900	1422800	1179000	727550	805850	708090	3884800	4466300	4170000	4744400	4871900	5327100	5550800	4801900	5368200	9	9	9	9	9	9	3348200	3087700	3282700	1450200	1469400	1350700	80608	111570	137470	1894900	1735900	1908700	1770300	C00062	ko00220,ko00261,ko00330,ko00472,ko00970,ko01100,ko01110,ko01230,ko02010
pme0008	176.1	113	175.096	C6H13N3O3	[M+H]+	L-Citrulline	Amino acids and derivatives	Amino acids and derivatives	372-75-8	3	95066	135880	76519	135800	227920	160110	93523	73355	51468	74750	57836	35983	47443	97070	54591	81936	53279	75708	80118	61288	89232	155580	290460	176490	101730	69272	84353	105290	101200	105470	102530	95651	92897	81250	C00327	ko00220,ko01100,ko01110,ko01230
Hmfn000531	175.02	87.01	176.032	C6H8O6	[M-H]-	L-Ascorbic acid (Vitamin C)*	Others	Vitamin	50-81-7	1	928460	974210	1000200	888690	865090	803950	475300	352340	314850	455910	314460	447250	256360	302780	243380	378420	510500	482460	684280	500830	537530	256940	226830	263390	158990	177300	162580	148020	148050	166600	379280	417600	368960	444820	C00072	ko00053,ko00480,ko01100,ko01110,ko01240
mws4175	175.02	85.03	176.032	C6H8O6	[M-H]-	D-Glucurono-6,3-lactone	Others	Saccharides and Alcohols	32449-92-6	2	4373000	4496200	3497800	2725100	2800200	2230300	466820	212860	494970	236520	577620	208450	269150	253820	279120	2950400	3345400	3526900	4783300	4122800	3937700	684500	566180	609540	427060	366410	367180	327030	430520	414690	707700	804660	863010	812930	C02670	ko00053,ko01100
pmb3101	175.06	115	176.068	C7H12O5	[M-H]-	2-Isopropylmalic Acid	Organic acids	Organic acids	49601-06-1	1	116980	129830	91236	78402	96733	74961	349080	360330	326310	251310	182420	238440	631150	591960	417120	61229	86506	72115	73318	54411	73249	128710	133900	118400	413720	395420	400220	950450	866650	724940	238250	212640	198360	163740	C02504	ko00290,ko00620,ko01100,ko01110,ko01210,ko01230
MWSmce690	175.02	59.01	176.12	C6H8O6	[M-H]-	Erythorbic acid*	Others	Vitamin	89-65-6	1	21183000	24443000	23017000	14677000	12967000	13010000	2266400	1420800	1496300	1649500	1368800	1479100	1729700	1643500	2160200	14223000	18275000	22788000	20757000	21752000	20135000	3541900	3812400	3219300	4906900	2704500	2874500	1295600	2055600	1871300	4226800	3952900	5161600	4343400	--	--
pmb0468	178	161	177.046	C6H11NO3S	[M+H]+	N-Formyl-L-Methionine	Amino acids and derivatives	Amino acids and derivatives	4289-98-9	3	159670	223100	277140	67438	28001	50058	13477	27189	16542	52163	38539	51430	27688	10971	10904	113410	155010	125100	70580	46486	60214	31967	52731	35374	13080	17753	17966	9568.4	5682.1	4741.1	52240	45991	50483	53595	C03145	ko00270
pme2253	177.04	59	178.048	C6H10O6	[M-H]-	L-Gulono-1,4-Lactone	Others	Saccharides and Alcohols	1128-23-0	3	267470	283500	330000	193930	189260	184540	11638	10029	11306	30772	13122	31333	17201	8821.2	5934.5	225190	255910	341370	345000	358800	311800	97398	37498	67891	74882	39272	24477	25526	28818	20703	62174	65460	52564	63828	C01040	ko00053,ko01100,ko01240
mws1200	177	145	178.063	C10H10O3	[M-H]-	Trans-4-Hydroxycinnamic acid Methyl Ester	Organic acids	Organic acids	19367-38-5	3	60229	64134	59711	29311	28687	25195	5048	4368.1	2826.5	3025.6	3363.2	3858.4	2970.5	4924.6	3905.9	97182	104040	97445	71684	71214	74249	14129	15123	16196	8023.8	7950.6	7170.8	6339.3	4833.8	4790.5	15264	15249	14243	16637	--	--
pmb2795	177	145	178.063	C10H10O3	[M-H]-	4-Methoxycinnamic acid	Organic acids	Organic acids	830-09-1	3	43278	44997	39452	19439	21901	20203	2757.5	2698	3218	2118.8	2418	2258.6	2236.3	4099.9	2853.5	70883	70949	68647	48448	53653	55832	11781	11927	11271	5503.5	5465	5503.3	3049.8	3615.2	4655.1	11985	10789	10774	12693	--	--
mws1195	179.07	147.1	178.063	C10H10O3	[M+H]+	p-Coumaric acid methyl ester	Organic acids	Organic acids	3943-97-3	3	8151	9653.6	8815.7	11886	10364	11081	1888.1	4002.9	4542	4298.4	3783.2	2610.6	5784.8	7438.3	4889	15763	15577	12794	6984.6	7352.2	9885	9105.6	9047.4	9510.1	3450.1	4278.6	4472.8	1178.6	3346.7	1103.2	6587.4	7020.1	6499.5	6961.2	--	--
mws2212	179.03	135.05	180.042	C9H8O4	[M-H]-	Caffeic acid	Organic acids	Organic acids	331-39-5	1	14687	15116	19961	16274	16363	12973	29541	29244	31579	38721	29771	29756	33515	40590	27956	30116	25924	32806	24325	29244	18832	71644	69331	66386	132610	114180	104280	1162900	1267400	1040800	113320	127260	85900	112680	C01197	ko00940,ko01100,ko01110
pme0516	179.06	87	180.063	C6H12O6	[M-H]-	Inositol*	Others	Saccharides and Alcohols	87-89-8	1	280420	279090	268350	378990	350030	374780	348470	371400	351360	309810	290850	306560	357520	420100	336590	579790	679060	866100	393260	458590	491930	666840	533580	630380	471660	628920	572730	614120	646770	680680	400470	418340	432430	377590	C00137	ko00052,ko00053,ko00562,ko01100,ko01110,ko02010,ko04070
pmf0138	179.06	59	180.063	C6H12O6	[M-H]-	D-Mannose*	Others	Saccharides and Alcohols	3458-28-4	1	11436000	12305000	10211000	15598000	14146000	14603000	4066000	4261200	4243700	4187200	3901100	4532300	3605600	4870900	3341600	14249000	14714000	13914000	15853000	18753000	17676000	8030400	8093700	9680700	6761500	7002300	7578900	5437700	4972300	5028900	8930300	7400700	7743400	7613400	C00159	ko00051,ko00052,ko00520,ko01100,ko02010
pmf0139	179.06	59	180.063	C6H12O6	[M-H]-	D-Galactose*	Others	Saccharides and Alcohols	59-23-4	1	7471000	7061000	7298400	9361200	10994000	9024200	2321200	2634300	2128000	3126100	2247500	2847600	2302700	3143100	2594400	8808800	10606000	9502600	11173000	13704000	10584000	5549000	4433100	5526800	5039400	4508700	5429300	3516000	3755400	3185100	5132300	5403900	5065800	4232800	C00124	ko00052,ko01100
mws1164	179.06	59.01	180.063	C6H12O6	[M-H]-	D-Fructose*	Others	Saccharides and Alcohols	7660-25-5	1	12774000	10610000	10862000	15118000	16890000	17262000	4261400	4507700	4368900	4727900	4257000	4907800	5106600	5146600	3916800	13660000	16011000	15915000	19895000	18970000	18510000	7565600	8295200	10031000	8180000	8212500	7999400	5997300	5123100	5926400	9400500	7776800	8294200	8105600	C05003	--
mws4170	179.06	59.01	180.063	C6H12O6	[M-H]-	D-Glucose*	Others	Saccharides and Alcohols	14431-43-7	1	11696000	10516000	11040000	15686000	14848000	16005000	4339400	4098800	4229500	4720100	5137900	4447900	4698600	4769000	3721100	15323000	14311000	14767000	18400000	16886000	18544000	8616600	8731300	9139100	7620200	7446000	9031200	5197700	6182000	5642800	8776100	8300400	8618600	9040700	C00031	ko00010,ko00030,ko00052,ko00500,ko00520,ko00524,ko00901,ko01100,ko01110,ko02010
Lmbn004847	179.07	146.04	180.079	C10H12O3	[M-H]-	4-Methoxyphenylpropionic acid	Organic acids	Organic acids	-	3	17376	19927	16381	10332	13486	9416.8	4046	4723.1	4365.4	7762.4	7023	6239.2	2367.8	5223.5	1342.3	38314	35733	37931	34022	35495	34874	40655	54301	64757	26403	20228	23434	49371	66537	51213	28449	21215	21852	23990	--	--
mws0093	179.07	146	180.079	C10H12O3	[M-H]-	coniferyl alcohol	Organic acids	Organic acids	458-35-5	3	64573	75913	73617	50290	55696	53071	19881	23320	15624	21796	29421	33624	14746	19205	11324	162550	154490	164720	141690	146610	141300	201840	205290	234010	114980	130010	133450	223560	234500	219290	113140	102590	113190	97739	C00590	ko00940,ko00998,ko01100,ko01110
MWSmce001	181.05	107.05	180.16	C9H8O4	[M+H]+	5-AcetylSalicylic acid	Organic acids	Organic acids	13110-96-8	3	14062	14004	10789	9766.3	13464	8670.2	11030	9717.8	8972.5	5319.2	11509	6584.4	9118.8	9596.3	7814.9	7588.3	4413.6	6382.7	6015.9	6362.8	5116	6659.8	4992.6	5639.6	5166.9	5267.7	5630.3	7921	5483.1	9	5514.2	9165.6	4510.2	8048.5	--	--
mws0250	182.08	136.1	181.074	C9H11NO3	[M+H]+	L-Tyrosine	Amino acids and derivatives	Amino acids and derivatives	60-18-4	1	6808300	6623500	5390300	3115600	2178700	2890800	1063500	1137600	1130200	2016000	2015800	1488700	1589800	1307300	1444000	1504600	1586500	1540300	1774100	1894900	1798800	2393900	2324700	1788600	909300	978740	912700	490090	364420	457930	2091600	2136200	2123100	2213100	C00082	ko00130,ko00261,ko00350,ko00360,ko00400,ko00460,ko00730,ko00940,ko00950,ko00965,ko00966,ko00970,ko00998,ko01100,ko01110,ko01210,ko01230,ko01240
pme2237	181.07	101	182.079	C6H14O6	[M-H]-	Dulcitol	Others	Saccharides and Alcohols	608-66-2	3	34948	24546	18464	14213	20452	21385	15703	6045	12674	16354	7827.5	10273	13006	13820	7276.8	10336	12719	19945	7315.8	19552	14588	7876	11410	6596.8	13892	8986.8	10251	20392	11894	20152	12679	11402	13308	13910	C01697	ko00052,ko01100
mws0214	181.07	71	182.079	C6H14O6	[M-H]-	D-Sorbitol	Others	Saccharides and Alcohols	50-70-4	3	75927	72723	52144	67886	67131	78924	28020	31681	24904	26738	22348	26731	18759	28583	20106	64796	52394	68290	69586	66014	92024	38286	39332	52498	30702	30976	30230	15013	27053	28478	44189	48754	48178	42218	C00794	ko00051,ko00052,ko01100,ko02010
MWSslk235	181.07	59.01	182.172	C6H14O6	[M-H]-	Allitol	Others	Saccharides and Alcohols	488-44-8	3	143220	147440	154290	154420	178420	175690	45671	40650	50465	66093	41882	53287	37286	64592	51000	140110	155360	166110	247530	189330	176610	87290	77481	95654	90860	99742	107080	53838	65011	77100	113600	84460	89839	87189	--	--
pme2596	184.06	148	183.053	C8H9NO4	[M+H]+	4-Pyridoxic acid	Others	Vitamin	82-82-6	3	14512	14196	12459	15281	13395	14190	8390.6	7455.1	8071.5	5956.6	6705.7	10436	5494.4	4430.2	4646	18340	19108	16768	19729	18207	19956	12845	15610	12874	10453	8397.2	9471.2	6948.7	6918.6	6146.5	9694.4	11734	11673	9909	C00847	ko00750,ko01100
MWSmce210	183	67.02	184.1	C7H4O6	[M-H]-	Chelidonic acid	Organic acids	Organic acids	99-32-1	1	805040	911210	752000	833120	1048600	1087100	398000	370340	363710	284770	276620	356520	302020	349940	276250	2359600	2222600	2514300	2635500	3169800	2412300	692270	910110	857580	1047500	950130	985190	624210	476020	552920	917120	891200	853670	866390	C08476	--
MWS1816	183.14	183.14	184.146	C11H20O2	[M-H]-	10-Undecenoic acid	Lipids	Free fatty acids	112-38-9	2	4856.8	9495.1	4672.9	6768.6	8107.1	6368.3	3704.1	5776	2353.7	5339.8	7319.8	7026.8	6370.7	8036.4	6809.6	6040.6	4955.9	4884.2	4790.2	6000.8	5570.7	8209.9	7364.3	6227.2	6500.4	7709.1	7980.2	8041.1	7518.3	7256.1	7601.4	5337.7	6382.4	5993.9	C13910	--
Zmgn000447	184.98	78.96	185.993	C3H7O7P	[M-H]-	3-Phospho-D-glyceric acid	Others	Saccharides and Alcohols	820-11-1	3	153520	163200	167500	251180	289430	235070	30529	96517	74958	95354	90205	97089	62868	177580	52736	149040	136740	160290	102730	100730	87326	345330	340810	402010	372850	371450	333850	419170	488620	442290	172050	180730	194270	225660	C00197	ko00010,ko00030,ko00260,ko00270,ko00561,ko00630,ko00710,ko01100,ko01110,ko01200,ko01230,ko01240
mws0752	185.15	185.16	186.162	C11H22O2	[M-H]-	Undecylic Acid	Lipids	Free fatty acids	112-37-8	1	154980	159820	158690	150230	151230	156840	156200	150940	142580	162380	160390	149700	149910	209390	156180	157610	166610	149690	159170	157400	160220	151140	152840	151540	393770	385100	385620	215190	214550	203530	195720	178620	171980	164020	C17715	--
Hmmp001310	188.07	118.07	187.063	C11H9NO2	[M+H]+	3-Indoleacrylic acid	Organic acids	Organic acids	1204-06-4	1	9402600	9052300	8425700	941100	1094700	1042700	130410	161950	161250	455360	430770	452670	820070	795600	851940	254930	289260	305270	388180	410700	394670	462790	440500	453890	138380	122260	134170	86627	87126	68878	1331500	1342600	1306900	1289100	C21283	--
pme0137	187.07	125	188.08	C7H12N2O4	[M-H]-	N-Acetyl-L-Glutamine	Amino acids and derivatives	Amino acids and derivatives	2490-97-3	3	86115	100830	95511	90489	70989	133470	162810	141340	152290	119090	117100	160310	140430	135680	127350	150300	141880	155370	58009	102740	82197	142010	188520	155140	170980	177660	181320	194880	251270	216190	124650	103690	90031	93870	--	--
pme2006	189.11	87	188.105	C9H16O4	[M+H]+	Diethyl glutarate	Organic acids	Organic acids	818-38-2	3	7153.7	5647.7	6894.9	2992	4879.8	3388.3	9	9	9	9	9	9	1582.6	1426.8	1024.5	16753	13138	12438	15883	12648	14270	3828.5	5369.1	5038.8	2682	1805.2	2303.7	9	9	9	5294.1	6958.3	6899.9	8768.1	--	--
mws0237	187.1	125	188.105	C9H16O4	[M-H]-	Azelaic acid	Organic acids	Organic acids	123-99-9	1	322700	298380	302890	231810	251940	233040	301700	246730	245900	410060	277480	295400	288680	368430	259120	337560	334250	280120	243450	236770	199850	316010	381820	402070	331530	312740	345500	368560	285130	310460	310950	291410	289290	253400	C08261	--
pme0122	189.12	126	188.116	C8H16N2O3	[M+H]+	N6-Acetyl-L-lysine	Amino acids and derivatives	Amino acids and derivatives	692-04-6	3	81482	85430	75806	89227	76699	81620	49816	41698	45406	50989	52163	35342	50660	46485	49100	65031	73089	61626	89930	99378	79908	63587	67679	71366	69404	72231	87761	87866	77829	96345	61221	70240	50275	77508	C02727	ko00310,ko01100
mws0736	189.12	86	188.116	C8H16N2O3	[M+H]+	N-Glycyl-L-leucine*	Amino acids and derivatives	Amino acids and derivatives	869-19-2	3	88417	74147	85547	59420	50390	55049	16615	13811	12460	22617	14049	14139	10043	11852	11183	27420	20666	24764	30436	24797	27869	15973	28219	14930	14088	13861	11208	5187.8	5477.7	9988.3	29569	30197	20431	31906	C02155	--
mws5041	189.12	86.1	188.116	C8H16N2O3	[M+H]+	L-Glycyl-L-isoleucine*	Amino acids and derivatives	Amino acids and derivatives	19461-38-2	3	104650	124180	122050	70937	71106	60930	15946	12607	14563	27786	15897	15975	15994	12383	13014	28717	29243	32160	31672	24082	34054	24479	24894	22924	9673.2	12280	15125	7491.4	6361.3	7116	38078	29559	33125	33664	--	--
pme3388	189.13	144	188.127	C7H16N4O2	[M+H]+	Homoarginine	Amino acids and derivatives	Amino acids and derivatives	156-86-5	2	13485	16951	12533	6406.9	8294	8342.6	59875	46559	42876	35731	48524	52834	67832	59067	81902	9	5206.1	9	9	9	9	9	9	6208.5	2830.3	6558.3	9	9	9	9	14681	16747	13339	16171	C01924	--
Zmdp000292	189.14	70.07	188.127	C7H16N4O2	[M+H]+	Arginine methyl ester	Amino acids and derivatives	Amino acids and derivatives	-	2	86325	101700	88553	49609	76628	39332	411200	308790	322570	368770	324960	493150	458860	422980	504280	11724	3837.5	11679	12858	17779	10468	70390	61645	58512	21479	38527	33538	7257	13813	9206.3	99836	109330	121200	95352	--	--
Zmjp000182	189.13	70.07	188.127	C7H16N4O2	[M+H]+	N-Monomethyl-L-arginine	Amino acids and derivatives	Amino acids and derivatives	17035-90-4	2	79358	76624	78170	64954	51888	79085	361480	336030	367390	325500	298190	423520	520360	433430	454930	26557	16186	26304	3566.6	10327	12860	68578	53501	69324	33017	27867	37686	15054	16962	9853.1	100540	132890	134380	128250	C03884	--
Zmzp000145	189.16	84.08	188.152	C9H20N2O2	[M+H]+	Trimethyllysine	Amino acids and derivatives	Amino acids and derivatives	23284-33-5	1	547950	639700	477410	418630	453250	429770	1214500	1204900	1036200	1088500	859490	1090500	1394800	1354900	1440700	74502	60367	86572	128000	111800	103330	295070	331680	213670	248250	254650	246840	350450	384170	351540	468210	400530	340370	449270	C03793	ko00310,ko01100
pme0075	188.06	128	189.064	C7H11NO5	[M-H]-	N-Acetyl-L-glutamic acid	Amino acids and derivatives	Amino acids and derivatives	1188-37-0	3	42377	29446	18769	21264	20250	26132	7697.8	10596	10047	10226	10720	20433	9207.9	12699	11112	32194	40652	39360	32422	20401	20253	35187	36550	32808	34359	21446	25546	24534	21194	24092	22407	9144.7	19191	16143	C00624	ko00220,ko01100,ko01110,ko01210,ko01230
Zmyn000453	191.02	111.01	192.027	C6H8O7	[M-H]-	Isocitric Acid*	Organic acids	Organic acids	320-77-4	1	2684200	2563700	2710700	9965600	10369000	10557000	20371000	18260000	22878000	26328000	24767000	24168000	21304000	26718000	20992000	370590	346440	347520	399110	373840	369400	10648000	12586000	12768000	8355300	7086100	7352500	6420800	6933100	7681900	14873000	13733000	13833000	14209000	C00311	ko00020,ko00630,ko01100,ko01110,ko01200,ko01210,ko01230,ko01240
mws0281	191.02	111.01	192.027	C6H8O7	[M-H]-	Citric Acid*	Organic acids	Organic acids	77-92-9	1	2930400	3118900	2973900	18147000	18503000	18185000	33975000	30943000	29855000	30160000	26232000	32180000	29202000	34385000	25460000	639520	797160	856020	667880	606800	516100	16588000	19510000	19945000	10624000	9284600	10589000	7552500	8018000	9364000	19524000	20959000	18371000	16529000	C00158	ko00020,ko00250,ko00630,ko01100,ko01110,ko01200,ko01210,ko01230,ko01240
mws0277	191.06	85	192.063	C7H12O6	[M-H]-	Quinic Acid	Organic acids	Organic acids	77-95-2	2	164820	132350	137870	615270	688070	710950	1652700	1508000	1551000	1647800	1432100	1613700	1440900	1725400	1555900	97676	85569	99881	41476	47466	84169	721000	883390	716730	523120	381390	522570	388220	435990	428180	916460	790420	766100	845050	C00296	ko00400,ko01100
mws1189	193.04	72.8	194.033	C6H10O7	[M-H]-	D-Galacturonic acid*	Others	Saccharides and Alcohols	685-73-4	3	37469	45448	45838	78108	63169	73530	14487	30318	24410	24025	27956	14580	13993	20458	23761	14723	16844	15240	32724	7557.8	15731	36286	31187	45574	59924	43269	50672	61088	57223	67863	30562	37164	42367	29796	C00333	ko00040,ko00053,ko00520,ko01100,ko01240,ko02010
pme3705	193.04	73	194.043	C6H10O7	[M-H]-	D-Glucoronic acid*	Others	Saccharides and Alcohols	-	3	66863	61824	45795	116400	115810	91878	29480	26180	29447	17690	33493	24433	29670	30522	36683	26602	12520	7108.4	32680	56439	40446	43281	47480	55088	51575	53101	53920	57926	52914	68950	36139	44408	48238	43995	C00191	ko00040,ko00053,ko00520,ko00562,ko01100,ko01240
Lmdn003756	193.05	135.05	194.058	C10H10O4	[M-H]-	Methyl caffeate	Organic acids	Organic acids	3843-74-1	3	36684	44965	46937	22981	17013	21920	3133.8	4285.2	5707.2	7832.6	3423.6	4420.9	6775	9521.2	7365.1	9	9	9	2741.2	9	9	9	9	9	9	9	9	9	9	9	10526	9662.5	8059.8	6760.4	C10477	--
mws0014	193.05	134.01	194.058	C10H10O4	[M-H]-	Ferulic acid*	Organic acids	Organic acids	537-98-4	3	15808	13914	14557	11858	13919	15576	41778	46403	30825	51055	48613	39313	72676	86979	47003	5866.6	3927.9	4637.7	9	4910.2	9	236040	264230	256570	411760	352480	342920	3469000	3716800	3587700	368630	318230	291820	335600	C01494	ko00940,ko01100,ko01110
pme0422	193.06	134	194.058	C10H10O4	[M-H]-	Isoferulic Acid*	Organic acids	Organic acids	537-73-5	3	15826	12142	14044	17823	14464	14507	40178	43727	39772	51415	55959	44612	61583	70362	47069	9	9	5884.1	4899.3	9	9	249490	296800	236760	410840	385800	390760	3481700	3427700	3770800	316160	312110	350110	326140	C10470	--
MWSslk097	195.06	163.04	194.18	C10H10O4	[M+H]+	Dimethyl phthalate	Organic acids	Organic acids	131-11-3	2	48573	60581	48464	71239	72894	69598	44558	51033	46641	51395	53042	41312	52735	47777	60151	83467	76491	80529	76946	81765	90843	50532	50613	55603	49228	51144	46044	53854	48343	53027	42594	42854	41329	39570	C11233	--
MWS1771	196.1	91.05	195.09	C10H13NO3	[M+H]+	L-Tyrosine methyl ester	Amino acids and derivatives	Amino acids and derivatives	1080-06-4	3	62031	57857	57894	39663	36395	36175	23043	23949	20685	18334	21606	19855	18348	15180	17319	49052	61468	47418	46877	45508	45438	23960	28597	33714	17715	15460	20245	8148.7	14633	6528.3	29027	26332	31268	33259	C03404	--
pme0534	195.05	74.9	196.058	C6H12O7	[M-H]-	Gluconic acid	Others	Saccharides and Alcohols	526-95-4	1	3125400	3182100	3455800	4764300	4626300	5370300	885650	873340	947370	858940	887330	819140	884290	921000	872780	1382600	1719500	2811900	1927200	2189400	1969600	1400200	1588300	1392200	1106800	1086000	1147300	774120	851720	808940	1766300	1699600	1748000	1554800	C00257	ko00030,ko01100,ko01110,ko01200
mws0923	200.05	154.04	199.04	C9H10ClNO2	[M+H]+	L-2-chlorophenylalanine	Amino acids and derivatives	Amino acids and derivatives	103616-89-3	3	13695000	13523000	12827000	15295000	14236000	13797000	15663000	16133000	15550000	15616000	14852000	14389000	15256000	14665000	15086000	16167000	15343000	14399000	14096000	16051000	15586000	16113000	15919000	14700000	15716000	15392000	15058000	15436000	14315000	14676000	14316000	14893000	13642000	14836000	--	--
Zmzn000079	199	78.96	200.009	C4H9O7P	[M-H]-	D-Erythrose-4-phosphate	Others	Saccharides and Alcohols	585-18-2	3	37381	36441	39011	35401	41925	27381	67006	46512	65275	46306	58565	67617	50838	63586	49274	33921	46704	44167	40885	32205	28799	67739	89242	62918	73299	69281	78611	96763	83971	88426	37977	28697	55339	31779	C00279	ko00030,ko00400,ko00710,ko00750,ko00998,ko01100,ko01110,ko01200,ko01230,ko01240
pmb2640	199.17	199.17	200.178	C12H24O2	[M-H]-	Dodecanoic acid (Lauric acid)	Lipids	Free fatty acids	143-07-7	1	251090	264960	249980	103200	106910	112020	450760	478070	472210	475400	474640	476100	494010	579720	470230	445210	426740	417010	338750	342180	332750	776120	807380	759410	2392600	2476000	2257700	1862800	1877400	1855500	887610	846940	852340	832390	C02679	ko00061,ko01100,ko01110
mws5037	203.14	86.1	202.132	C9H18N2O3	[M+H]+	L-Alanyl-L-leucine	Amino acids and derivatives	Amino acids and derivatives	3303-34-2	3	73752	70630	71079	65646	88544	80323	81292	56805	79427	60698	80657	87358	58940	70144	70611	59303	61814	53472	63024	61369	75943	74788	72904	58692	40792	33936	29829	20297	23449	20451	73958	66843	61716	65107	--	--
NK10251888	203.15	70.07	202.143	C8H18N4O2	[M+H]+	NG,NG-Dimethyl-L-arginine	Amino acids and derivatives	Amino acids and derivatives	30315-93-6	1	118370	98427	116560	89708	82612	126140	229570	186220	188280	150160	156020	183050	235990	222840	275350	23575	11694	11325	19078	16375	17964	27346	18919	26199	12811	16100	15404	15506	25405	22629	75434	60171	88582	103100	C03626	--
Zmbp002538	205.1	146.06	204.09	C11H12N2O2	[M+H]+	1-Methoxy-indole-3-acetamide	Organic acids	Organic acids	-	1	41528000	40025000	39599000	5715200	6130100	6252400	1003100	1033200	1013600	2878100	2500400	2426000	4989300	5147900	4773800	1553500	1660400	1620600	2377100	2192500	2324000	2669700	2446200	2490000	832190	827880	803470	541770	553820	493170	8069300	7030000	7374400	7784200	--	--
mws0282	203.08	116.05	204.09	C11H12N2O2	[M-H]-	L-Tryptophan	Amino acids and derivatives	Amino acids and derivatives	73-22-3	1	3009400	3616800	3067500	345520	353790	367910	84163	83173	95380	194250	255600	220530	445000	660100	415590	163370	138150	123870	213210	221580	205710	218640	193470	239060	96064	70367	74954	49630	52535	39002	750220	704010	702140	664180	C00078	ko00260,ko00380,ko00400,ko00901,ko00966,ko00970,ko00998,ko01100,ko01110,ko01210,ko01230,ko01240
Lmrn003201	204.07	158.06	205.074	C11H11NO3	[M-H]-	Indole-3-lactic acid	Organic acids	Organic acids	1821-52-9	1	1489000	1713100	1621000	1268000	1170400	1294700	1335800	1520400	1457500	1378900	1377800	1439000	1521500	1935800	1495000	452270	423270	351560	254470	237640	226800	1269600	1378700	1422900	1636500	1788900	1686400	1582200	1544300	1387000	1254900	1200600	1176200	1206700	C02043	--
pme1261	206.14	76	205.131	C9H19NO4	[M+H]+	D-Panthenol	Others	Saccharides and Alcohols	81-13-0	3	48236	53807	49583	18687	25811	48066	33521	30004	39438	38194	46188	27294	37306	16654	21991	73113	86731	43127	15322	40326	43647	118000	15090	35897	43597	21700	74293	163150	60107	35851	25176	27972	23712	19720	C05944	ko00770
Lmln010063	205.16	189.13	206.167	C14H22O	[M-H]-	2,6-Di-tert-butylphenol	Organic acids	Organic acids	128-39-2	1	105430	128360	130480	173050	139690	133240	120270	115080	113410	121130	126100	112230	115940	148190	115260	141970	148840	145610	145180	144980	134900	131010	140720	115590	105800	100250	97258	108730	100880	98732	124260	115020	107380	118550	--	--
MWSslk120	208.1	120.08	207.226	C11H13NO3	[M+H]+	N-Acetyl-DL-phenylalanine	Amino acids and derivatives	Amino acids and derivatives	2901-75-9	3	8555.7	7443.4	8815.3	9998	7588.7	8163	6445.6	5910.3	3511.3	4193.9	7238.9	4442.1	5690.7	6102	3977.7	6857.9	13408	10840	9397.4	9504.3	12419	6198.3	8548.2	7062.7	7470.9	3825.6	4498.5	3754.2	2382.7	3830.6	7520.2	4969.4	6363.6	2946.9	--	--
MA10107783	207.03	119.05	208.037	C10H8O5	[M-H]-	3-[(1-Carboxyvinyl)oxy]benzoic Acid	Organic acids	Organic acids	16929-37-6	2	58496	58458	71398	57237	50203	61494	327580	313970	319160	349900	329830	319160	395100	564090	417590	48107	51660	53894	36942	32719	28204	131890	144680	144950	1663000	1592700	1646000	1085900	1059800	1037000	433840	335750	340280	327320	C20772	ko00130,ko01100,ko01110,ko01240
pme3443	207.07	192	208.074	C11H12O4	[M-H]-	Sinapinaldehyde	Organic acids	Organic acids	4206-58-0	3	11944	11642	8964.5	6465.3	5893.7	8710.4	10925	11544	9061.1	9479.9	9121.5	10718	5746.9	7879.5	7637.4	41194	41600	33373	39065	47855	39514	4678.6	5407.9	4817.1	6469.6	5390.1	4869.3	9027.1	8056.6	6332.6	13999	10463	13595	11744	C05610	ko00940,ko01100,ko01110
mws1212	209.08	177.3	208.074	C11H12O4	[M+H]+	Methyl ferulate	Organic acids	Organic acids	-	3	6634.5	6522.2	6535.5	3511.4	3453.5	2937.6	2755.4	2615.6	2631.8	1451.5	2004.3	2569.1	2190.7	1977.1	2535.3	13802	16714	14997	9356	7425.7	11462	13184	17058	16324	30106	23238	25556	47177	45754	48174	9252.9	8331.8	8338.8	11005	--	--
Lmsn000954	207.09	59.01	208.095	C8H16O6	[M-H]-	Dambonitol	Others	Saccharides and Alcohols	523-94-4	2	61512	78268	61440	63079	43033	62848	4722.3	18546	13376	8669.9	7584.8	9	18957	13104	8721.9	555150	512910	512670	330930	308020	347260	39126	46849	53004	144860	145180	115750	154660	158310	116460	56940	51423	33211	39340	--	--
Zmyn000108	209.03	85.03	210.038	C6H10O8	[M-H]-	D-Saccharic acid	Others	Saccharides and Alcohols	87-73-0	1	1634900	1441200	1395600	2116800	1905300	1936000	549140	458860	677550	452110	557090	462680	449590	605340	569700	1983500	1830800	2007200	1660300	1646900	1527300	834210	666520	811410	408700	540780	497080	353710	409920	307910	995290	977690	794880	1022100	C00818	ko00053,ko01100
Zmpn000199	209.03	85.03	210.038	C6H10O8	[M-H]-	D-Galactaric acid	Others	Saccharides and Alcohols	526-99-8	2	1445300	1334800	1390900	1793200	1858600	1886700	303800	550220	639710	487600	555780	572660	301160	595510	531220	1697700	1710100	1587900	1036600	1307600	1702300	726890	754800	726840	626750	392330	505650	420200	403270	313300	790660	1036700	932060	660040	C00879	ko00053,ko01100
mws0853	209.08	179	210.089	C11H14O4	[M-H]-	Sinapyl alcohol	Organic acids	Organic acids	537-33-7	3	19135	16114	20762	10125	17468	16093	41025	42475	46799	72962	65371	64230	29148	32540	24131	137020	146590	115990	162420	155460	144320	16371	9679.8	15019	23840	22070	23153	19499	25790	22864	59423	43151	56102	44925	C02325	ko00940,ko01100,ko01110
pme1654	209.12	59.02	210.126	C12H18O3	[M-H]-	Jasmonic acid	Organic acids	Organic acids	77026-92-7	3	442480	413790	424870	287440	241470	264070	16500	15757	14700	10840	11668	9608.1	6543.1	8746	5897.3	493280	480730	505100	685680	706100	688440	50695	42420	43972	9	9	9	9	9	9	192160	181210	183020	184200	C08491	ko00592,ko01100,ko01110,ko04075
pmb0128	213.3	81	212.178	C13H24O2	[M+H]+	δ-Tridecalactone	Lipids	Free fatty acids	7370-92-5	3	4906.1	6666.9	6747.8	6364.1	6059.9	6812.2	8474.3	7754.6	8765.8	9359	9659.2	10014	7947.6	6634.2	7253.9	8381.6	8829.1	7874.7	9330.7	7772.4	6449	5134.7	5998.4	5586.2	3711.3	2564.2	4470.7	1967.7	1410.4	1988	6899.9	7465.6	6382.4	6360.1	--	--
pmb2507	213.1	97	214.024	C5H11O7P	[M-H]-	2-Deoxyribose-1-phosphate	Nucleotides and derivatives	Nucleotides and derivatives	17210-42-3	3	102590	111080	92023	101420	95582	141170	40982	32204	37810	80546	69284	59442	108590	70918	75629	15079	18610	8651.4	27116	24528	18346	72534	139460	193530	146240	94056	150690	105350	96657	257620	137220	50852	99784	139330	C00672	ko00030,ko00240,ko01100
MWS1900	215.13	153.13	216.136	C11H20O4	[M-H]-	Undecanedioic acid	Lipids	Free fatty acids	1852-04-6	2	16621	26273	16611	19133	17904	16378	30178	38373	36035	38175	38281	36871	31255	30947	24363	18492	20500	19811	16876	15623	16983	38775	50024	43939	68121	61025	50826	62601	68375	58908	48458	44404	45826	41043	--	--
mws1337	220.12	202.1	219.111	C9H17NO5	[M+H]+	D-Pantothenic Acid	Others	Vitamin	79-83-4	1	2585800	2573100	2678600	2909000	2876400	2852400	1722600	1906500	1880600	1671600	1726800	1527000	1588500	1581400	1552000	1434100	1638600	1572000	1055000	1205000	1315800	1726200	1767100	1622000	1484500	1414700	1446700	1267600	1248500	1277600	1935200	1848200	1840100	1704500	C00864	ko00410,ko00770,ko01100,ko01110,ko01240
pme1228	221.09	204	220.085	C11H12N2O3	[M+H]+	5-Hydroxy-L-tryptophan	Amino acids and derivatives	Amino acids and derivatives	56-69-9	3	51344	45687	37124	8367.4	10411	13186	11403	12353	11304	10624	7190.9	9510.7	10382	9351.5	15232	12085	10633	11389	12048	11208	12488	6397.2	5200.5	9	9	9	9	9	9	9	11797	12894	12370	10728	C00643	ko00380,ko01100
mws2608	222.1	84.05	221.09	C8H15NO6	[M+H]+	N-Acetyl-D-galactosamine*	Others	Saccharides and Alcohols	1811-31-0	3	1576500	1430200	1619300	1374100	1566600	1351000	1349800	1254000	1333500	1199500	1314800	1125500	1352500	1380100	1335500	1234000	1133800	1202400	1116700	1087900	1090200	1353100	1233700	1207100	1447900	1147000	1185400	1361500	1173900	1214400	1237900	1237700	1275000	1180900	C01132	ko00052,ko01100
pme2755	222	144	221.09	C8H15NO6	[M+H]+	N-Acetyl-D-glucosamine*	Others	Saccharides and Alcohols	7512-17-6	3	3326900	3322600	3332700	2924900	2766700	2856600	2923700	2959000	2958700	2728500	2761400	2608500	2972300	2741000	2727700	2341800	2405300	2312300	2369700	2255700	2115700	2549700	2717300	2628200	2666600	2601400	2579000	2477500	2526600	2682900	2803200	2363600	2526100	2540900	C00140	ko00520,ko01100,ko02010
mws5042	223.11	120.09	222.1	C11H14N2O3	[M+H]+	L-Glycyl-L-phenylalanine	Amino acids and derivatives	Amino acids and derivatives	721-66-4	3	130750	136660	147870	82512	94332	98620	12590	12918	8928.9	14435	20378	20722	9758.3	19649	12055	51112	46491	30748	43118	41704	39964	25560	33023	21633	10704	16933	15655	7076.7	9219.9	6156.4	38368	34386	29851	32834	--	--
MWS4296	223.11	120.08	222.1	C11H14N2O3	[M+H]+	Glycylphenylalanine	Amino acids and derivatives	Amino acids and derivatives	-	3	143670	154030	138990	96047	80287	83259	11467	12003	8226.1	22871	25594	23121	10401	11463	13589	38905	35191	36073	56828	48925	34873	21421	13054	25094	9296.9	5740.6	12625	7149.7	6095.5	3985	44435	46915	43154	39883	--	--
mws4085	223.06	193	224.068	C11H12O5	[M-H]-	Sinapic acid	Organic acids	Organic acids	530-59-6	1	9108.8	13298	13921	3393.7	9	9	11968	10921	9646.5	13621	18393	16147	8051.5	12973	6975.3	9488.5	17038	12680	14139	10039	10189	5190.8	3772.2	7509	19593	25922	24745	39881	48562	38960	12871	8568.6	11506	11073	C00482	ko00940,ko01100,ko01110
MWS2010	451.11	163.05	226.059	C9H10N2O5	[2M-H]-	3-nitro-L-tyrosine	Amino acids and derivatives	Amino acids and derivatives	621-44-3	3	4411.9	7021.4	6070.8	9916.2	9139.4	7436.6	14201	12435	18178	21829	15491	14379	14227	17377	13582	9	2951.6	9	9	9	9	2519.2	9	3154.5	2951.3	7344	4263.2	3757.9	3155.2	4027	10570	6699.8	6899	6554.7	--	--
pmb2643	225.19	207	226.193	C14H26O2	[M-H]-	Myristoleic acid	Lipids	Free fatty acids	544-64-9	1	9	9	9	9	9	1511.2	19260	19672	18010	19994	19015	21462	14500	22726	17900	9	9	9	9	9	9	17506	17642	17790	45469	48168	43404	51655	50586	46201	18751	17861	14767	17164	C08322	--
MWStz170	227.14	86.06	226.3	C11H18N2O3	[M+H]+	Cyclo(L-Leu-trans-4-hydroxy-L-Pro)	Amino acids and derivatives	Amino acids and derivatives	115006-86-5	3	3209.7	3965	4570.6	3467.7	2519.3	3469.5	3553.2	2864.1	2579.9	2851.4	2918.5	2311.5	2097.4	2775.7	2851.9	1391.7	9	9	9	1394.9	776.58	1459.6	2163.1	1458.4	1525.3	1738.6	1603	3059.6	1195.7	1884.1	2719.7	2367.9	1886.2	1535.3	--	--
Lmlp002765	229.12	201.13	228.115	C15H16O2	[M+H]+	Stilbostemin B	Organic acids	Organic acids	162411-67-8	1	944.09	1707.6	1338.8	898.26	2412.4	896.05	3911	2805.2	3991	2996.4	3044.4	1779.9	2452.1	3153.7	2588.4	1321	925.28	1016.6	1425.8	1259.4	2079.2	2587.7	3334.3	4799.7	7356.6	7553.5	6734.6	6084.8	3570.3	3625.3	3026.2	2671.9	3296.4	2352.5	--	--
mws0119	227.2	227.2	228.209	C14H28O2	[M-H]-	Myristic Acid	Lipids	Free fatty acids	544-63-8	1	5519500	4669100	4905300	2777300	3200500	3019700	7466000	6913000	6735500	6589600	6419900	6989200	7068200	8198500	7626400	5317300	5454600	4708600	3753000	3659600	2877000	8307800	9076300	8877600	16368000	14057000	15688000	16673000	16509000	15054000	9910200	8575300	8618200	8686500	C06424	ko00061,ko01100
Lmhp001461	229.15	70.07	229.154	C11H20N2O3	[M+H]+	L-Prolyl-L-Leucine	Amino acids and derivatives	Amino acids and derivatives	52899-07-7	3	65206	51316	49598	91738	53414	32340	55530	44628	52362	62372	65419	66140	46592	50416	50459	29183	37251	36566	37120	21442	53412	27451	55836	52478	53759	32674	30306	33122	44861	30428	42946	48268	46344	34389	--	--
pma6455	229.01	96.97	230.02	C5H11O8P	[M-H]-	Ribulose-5-phosphate	Others	Saccharides and Alcohols	4300-28-1	3	25474	32042	42945	22006	30506	26320	9	9	11009	9	9	9	9291.2	9	9	49818	48079	57677	40853	33584	75754	72141	35218	30824	40140	31358	27748	39629	39212	33956	31700	33920	22987	35948	C00117	ko00030,ko00230,ko00440,ko00710,ko00750,ko01100,ko01110,ko01200,ko01230,ko01240
Lmhp001670	231.16	72.08	231.17	C11H22N2O3	[M+H]+	L-Valyl-L-Leucine	Amino acids and derivatives	Amino acids and derivatives	3989-97-7	1	56119	48743	57104	32272	33645	44200	19820	17931	20854	29349	21404	25459	16254	17442	14259	26717	27025	28485	29308	29030	34046	21875	33122	30171	23646	24224	20294	10510	9913.3	11901	27220	22627	25022	25620	--	--
mws4176	237.12	120.09	236.116	C12H16N2O3	[M+H]+	L-Alanyl-L-Phenylalanine	Amino acids and derivatives	Amino acids and derivatives	3061-90-3	3	55155	43396	40771	55174	41283	47927	36675	46457	51976	40253	37266	43558	27104	42664	39235	43391	30385	47950	47152	33681	43627	53826	60450	55121	40629	33622	29452	29411	23633	24896	49023	37827	38662	33964	--	--
Lmhn003240	237.04	121.03	238.048	C11H10O6	[M-H]-	Benzoylmalic acid	Organic acids	Organic acids	22138-51-8	2	8092.1	8092	9	4170.6	2612.7	5336.9	256180	272710	304670	288710	296390	290650	768320	1013600	729830	9	9	9	9	9	9	9	2011.7	9	3542.3	4321.1	3666	2155.1	9	3845.1	119970	113220	115760	98413	--	--
pmn001669	237.08	147	238.084	C12H14O5	[M-H]-	Methyl sinapate	Organic acids	Organic acids	20733-94-2	3	6917.1	6973.8	8386.3	9	9	9	9	9	9	9	9	9	9	9	9	9	17147	15210	11047	12469	12859	1154.4	9	9	9	9	1053.6	1415	9	1764.9	2509.8	1932.7	3304	2107.8	--	--
pme2827	239	223	240.245	C16H32O	[M-H]-	Palmitaldehyde	Lipids	Free fatty acids	629-80-1	3	27553000	29896000	29582000	45105000	45486000	44554000	57727000	54797000	57624000	59843000	60439000	59033000	57816000	58142000	58421000	30337000	32173000	34608000	34604000	34035000	34943000	43522000	41228000	44103000	39149000	38444000	40338000	42313000	43196000	43060000	47252000	46463000	44837000	45183000	C00517	ko00071
pme0264	243.1	127	242.09	C10H14N2O5	[M+H]+	Thymidine	Nucleotides and derivatives	Nucleotides and derivatives	50-89-5	3	21705	27003	22239	24021	20470	15909	7223.9	9	7252.7	6362.9	3713.8	3036.2	5753.1	1938.4	1796.6	37085	31233	37665	73540	55505	59794	13960	11894	8275.2	13719	14312	12492	15874	13651	14787	20118	16236	16515	16565	C00214	ko00240,ko01100
MWS2430	241.22	241.21	242.225	C15H30O2	[M-H]-	13-methylmyristic acid	Lipids	Free fatty acids	2485-71-4	1	156510	149330	123110	77891	96309	101470	80351	76930	74085	78517	85209	73286	86591	130810	89684	151630	145780	131730	107440	99695	106460	98680	93683	94776	127000	138160	144380	161870	154660	150080	123150	123260	105430	115090	--	--
ML10180524	244.09	112.05	243.086	C9H13N3O5	[M+H]+	Cytarabine	Nucleotides and derivatives	Nucleotides and derivatives	147-94-4	3	36827	30928	33594	30961	25757	29965	16804	20437	22771	45646	43515	44483	30621	22018	24998	73420	74696	86818	81184	97912	86024	90597	95761	88874	175670	170680	157550	218360	183710	220710	71071	50634	59123	69804	C02961	--
pme3732	244.09	112	243.086	C9H13N3O5	[M+H]+	Cytidine	Nucleotides and derivatives	Nucleotides and derivatives	65-46-3	3	9	9	9	9	9	9	9	9	1730	15360	8238.4	12311	9	9	6948.5	60520	59818	48241	44506	35056	35490	35162	41939	40142	51561	39763	20823	45992	27233	51810	17491	17587	19041	20387	C00475	ko00240,ko01100,ko02010
pme2266	245.1	227	244.088	C10H16N2O3S	[M+H]+	Biotin	Others	Vitamin	58-85-5	3	20917	19805	21158	17713	15958	16373	9	9	9	9	9	9	9	9	9	10335	10613	12477	16218	16288	14218	4102.1	5320.9	9	9	9	9	9	9	9	6699.6	7776	5959.2	6247.8	C00120	ko00780,ko01100,ko01240,ko02010
MWS5231	243.16	181.16	244.167	C13H24O4	[M-H]-	Tridecanedioic acid	Lipids	Free fatty acids	505-52-2	1	122190	149810	129850	129490	123030	121610	131810	129420	129060	140210	135280	136460	126830	162040	139400	88342	90601	86562	96879	94564	93467	119800	120090	119250	147080	138940	121330	139850	135870	143860	132640	130720	126520	121450	--	--
Lmhp002031	245.18	86.1	245.186	C12H24N2O3	[M+H]+	L-Leucyl-L-Leucine	Amino acids and derivatives	Amino acids and derivatives	3303-31-9	1	31651	38873	26724	28180	20260	28925	19014	21974	23554	21908	26796	25573	17108	16066	19607	22023	23094	17989	20307	19657	18809	14961	19219	16923	15798	19338	16180	7875.2	7079	6763.7	15704	16625	23958	17511	--	--
pmb2591	245.09	203.2	246.1	C13H14N2O3	[M-H]-	N-Acetyl-L-Tryptophan	Amino acids and derivatives	Amino acids and derivatives	1218-34-4	1	41131	36573	42010	13162	14917	15503	9859	11860	10745	6233.9	8900.3	7056.1	8859.6	9045.5	9759.8	10280	11539	13699	22483	10619	14038	3805	7320.1	6533.9	6494.1	5654.7	4444.7	2388.5	2737.5	1879.5	6363.8	9118.7	14715	16077	--	--
mws0124	247.11	130	246.1	C13H14N2O3	[M+H]+	N-(3-Indolylacetyl)-L-alanine	Amino acids and derivatives	Amino acids and derivatives	57105-39-2	3	18746	18306	24090	9686.7	8672.2	9390	1557.9	9	916.88	2069.8	9	1990	9	1077	659.43	3630.4	4579.4	5162.6	5712.8	5906.3	6343	2881.6	2100	3122.7	9	9	9	9	9	9	5340.3	5003.7	4999.4	4592.9	--	--
Zmdp001647	247.13	184.1	246.122	C10H18N2O5	[M+H]+	γ-Glutamyl-L-valine	Amino acids and derivatives	Amino acids and derivatives	-	1	105700	106710	104460	50223	57638	48817	248110	247490	256740	277230	259870	260130	345630	347780	319010	29273	23629	22666	37617	34429	38607	53043	54865	58169	45751	55352	53050	40190	43046	39001	107040	105060	94176	95092	--	--
pme2563	249.06	128	250.062	C8H14N2O5S	[M-H]-	γ-Glu-Cys	Amino acids and derivatives	Amino acids and derivatives	636-58-8	3	9	9	9	9	9	9	83689	76565	66517	34947	65887	59782	70282	104780	66089	9	9	9	9	9	9	9	9	9	27361	27637	35752	14507	12712	27701	22028	33617	35166	25489	C00669	ko00480,ko01100,ko01240
pme3961	252.11	136	251.102	C10H13N5O3	[M+H]+	2'-Deoxyadenosine	Nucleotides and derivatives	Nucleotides and derivatives	958-09-8	1	4985.3	4126.6	4822.5	8367.7	4262.4	8243	9	9	5509.3	5872.2	7029.8	5331.9	10007	6850.4	6896.1	19238	17268	14573	18713	16189	21574	7792.9	7697.6	6453.8	23074	21361	20766	23068	18660	17991	7908.2	12665	8557.7	12439	C00559	ko00230,ko01100,ko02010
MWSmce116	252.1	136.06	251.24	C10H13N5O3	[M+H]+	5'-Deoxyadenosine	Nucleotides and derivatives	Nucleotides and derivatives	4754-39-6	3	29319	31553	26004	18113	15322	20397	4338.6	5901.9	3785.9	4372.8	4206.3	3670.6	4708.9	3200.2	3966.8	20393	22266	24014	16909	18983	18282	9404	9717.5	11541	6876.9	9	7067.3	9	9	9	9490	8263.8	8610.7	9288.5	C05198	--
Lmhn003373	253.04	137.02	254.043	C11H10O7	[M-H]-	p-Hydroxybenzoylmalic acid	Organic acids	Organic acids	-	1	571960	616020	592100	209340	185200	193190	535520	536110	517660	530600	534860	535170	679930	760360	586740	211800	190860	202590	183100	178870	177200	166020	165150	153390	85758	98578	95744	96468	84044	91170	303310	266730	258500	222940	--	--
mws0361	253.22	235.19	254.225	C16H30O2	[M-H]-	Palmitoleic Acid	Lipids	Free fatty acids	373-49-9	1	1903.8	1508	1771.5	5827.5	5204.7	4040.9	11957	13877	12209	12308	11083	11954	11703	14345	15723	1982.6	1733.4	1605.2	408.09	683.12	9	11927	12291	13755	12896	14935	12787	12165	14300	12963	12211	10745	12204	9305.1	C08362	ko00061
Lmcn009122	253.22	235.21	254.225	C16H30O2	[M-H]-	(7Z)-Hexadecenoic acid	Lipids	Free fatty acids	2416-19-5	1	2203.1	1790.9	1793.8	16057	16964	18715	46720	50292	48341	43105	43802	50381	45027	55700	48782	4116.7	2982	3143.3	1193.5	619.75	1234.2	39251	42921	40743	46777	42586	50839	43758	51468	49805	47371	42725	41579	42568	--	--
pma3101	256.2	124.1	256.082	C11H14NO6+	[M+H]+	Nicotinate D-ribonucleoside	Others	Vitamin	17720-18-2	3	13853	10770	21003	28352	35649	44043	24152	35348	29273	29473	21475	23025	32817	44862	40784	100950	111260	73574	60177	60267	78959	48693	74040	49181	56823	64949	51178	117690	137000	133750	46259	31222	30797	33397	C05841	ko00760,ko01100
mws1488	255.23	237.22	256.24	C16H32O2	[M-H]-	Palmitic acid	Lipids	Free fatty acids	-	2	5243.8	5237.8	4399.9	4977.4	5312.4	4004.7	4609.5	4330.8	4894.1	4034.7	5270.8	4375.7	3439.9	4815.8	4558.9	3918.2	5034.4	5197.1	4995.6	4189	4459.8	2717.3	2494.8	3663.4	2791.5	3966.4	3857.7	4702.1	4612.6	4840.5	4294.7	4420.1	4779.2	4121.3	C00249	ko00061,ko00062,ko00071,ko00073,ko01040,ko01100,ko01212
MWSslk133	257.18	195.18	258.35	C14H26O4	[M-H]-	Tetradecanedioic acid	Lipids	Free fatty acids	821-38-5	2	8606.6	12534	10655	8950.7	8860.6	9318.2	12055	10337	10299	10473	11500	11455	9429.9	12667	11610	8263.5	6467.2	7278	6981.5	8332.2	9457.7	8843.2	8534.4	9318.8	9344.6	11506	10190	12275	13366	12274	9577.8	9486.8	11537	10708	--	--
Zmyn000110	258.04	78.96	259.046	C6H14NO8P	[M-H]-	D-Glucosamine 1-phosphate	Others	Saccharides and Alcohols	2152-75-2	3	42036	35032	48160	17948	24779	23503	55067	55423	48864	54737	51357	50130	62634	76584	42262	50823	47789	35359	41754	54762	43519	89870	89446	82632	107190	80755	96913	160100	150490	139270	82635	88915	68366	53725	C06156	ko00520,ko01100
mws1090	259.02	97	260.03	C6H13O9P	[M-H]-	Glucose-1-phosphate*	Others	Saccharides and Alcohols	59-56-3	1	1196400	1354300	1242100	1217900	727370	1044600	1838500	1548100	1415000	1190800	1183100	1115400	1210900	1657200	1295600	1381500	1058500	1009400	813090	1060200	1125600	2059800	2491400	1891200	1064400	1016600	1131400	1713800	1743700	1292100	1358100	1207900	1317700	1257600	C00103	ko00010,ko00040,ko00052,ko00500,ko00520,ko00523,ko00561,ko01100,ko01110,ko01240
pme3313	259	97	260.03	C6H13O9P	[M-H]-	D-Fructose 6-phosphate*	Others	Saccharides and Alcohols	643-13-0	1	372900	327190	351680	515440	369790	206080	9	9	9	9	9	9	9	9	9	742540	562230	574160	519670	544210	702910	833430	293460	488980	660910	728510	437240	430460	600370	293720	740550	559850	434860	221150	C00085	ko00052,ko00500,ko00710,ko01100,ko01110,ko01200
mws0866	259.02	97	260.03	C6H13O9P	[M-H]-	D-Glucose 6-phosphate*	Others	Saccharides and Alcohols	56-73-5	1	1218000	1006500	1092900	1398700	1175000	1206500	1537000	1439500	1380200	1362400	995840	1108800	1360000	1578800	1297900	808170	1033600	1105200	903320	1030000	991780	2100100	1992800	2092900	1151900	1038200	1112200	1571300	1640800	1401000	1214000	1239700	1233200	1256300	C00092	ko00500,ko00524,ko00562,ko00998,ko01100,ko01110
Zmdp002216	261.14	86.1	260.137	C11H20N2O5	[M+H]+	L-γ-Glutamyl-L-leucine	Amino acids and derivatives	Amino acids and derivatives	2566-39-4	1	70690	58931	78083	33632	38149	37506	376120	353220	351910	307700	298160	297480	379580	345010	324280	98414	65803	79603	79672	77669	113400	25271	28060	27091	64080	66450	69587	43339	33445	47889	135930	109500	121410	128080	--	--
Zmpn000095	261.04	78.96	262.045	C6H15O9P	[M-H]-	Sorbitol-6-phosphate	Others	Saccharides and Alcohols	20479-58-7	3	16981	12188	20044	16609	19539	26297	16601	11701	15064	12244	7775.2	10473	19003	21973	12163	14191	17668	10784	11742	21549	17205	27353	30847	20022	24054	17161	23477	18587	20059	22011	12181	20446	11760	13682	C01096	ko00051,ko01100
Lmtn004049	263.13	204.12	264.136	C15H20O4	[M-H]-	Abscisic acid	Organic acids	Organic acids	21293-29-8	1	85318	76913	84898	57024	57132	60094	189260	190370	179230	174070	167870	165790	151910	194590	166950	66069	66711	64564	82855	79131	73610	217120	217910	204720	488730	505200	485410	261260	279980	252540	168620	148990	156560	141350	C06082	ko00906,ko01100,ko01110,ko04075
pmb0952	265.1	122.1	265.112	C12H17N4OS+	[M+H]+	Thiamine (Vitamin B1)	Others	Vitamin	70-16-6	3	362150	344010	289540	649270	498770	545250	197910	240000	214050	252580	218960	164560	204580	224490	222250	522570	494610	507750	488390	419330	374710	310790	323270	240330	357190	313310	206810	156060	102510	122210	350020	390340	318740	322280	C00378	ko00730,ko01100,ko01240,ko02010,ko04122
pme0230	268.1	136.06	267.097	C10H13N5O4	[M+H]+	Adenosine	Nucleotides and derivatives	Nucleotides and derivatives	58-61-7	1	657210	695990	596030	956750	936610	947180	1594100	1434500	1370300	2004800	1977000	1928200	1174800	1125700	1200300	2187100	2260100	2232200	2048000	1968500	2087200	3009600	3216100	3107500	5225900	5257600	5058500	9263800	9089200	7461500	2287700	2464700	2277700	2290800	C00212	ko00230,ko01100,ko02010
pme1184	268.1	152	267.097	C10H13N5O4	[M+H]+	2'-Deoxyguanosine	Nucleotides and derivatives	Nucleotides and derivatives	961-07-9	1	4185.6	7296.9	8941.8	9298.3	14093	14814	3311.1	9	9	5501.3	3632.7	4575	3283.3	4025.9	2021.8	31862	35502	33651	45018	37450	37695	13280	20966	14384	17644	17253	22013	19615	19845	19069	15489	16644	18319	16126	C00330	ko00230,ko01100,ko02010
mws1060	267.07	135	268.081	C10H12N4O5	[M-H]-	9-(Arabinosyl)hypoxanthine	Nucleotides and derivatives	Nucleotides and derivatives	7013-16-3	1	74078	88526	88368	26395	22717	27540	16630	15410	17177	46899	60727	74448	25393	28814	23961	15792	8008.6	10986	12955	8593.7	10948	26153	38523	28953	18764	18637	15825	83584	86827	86286	37496	26252	30924	27373	--	--
mws0383	267.23	267.23	268.24	C17H32O2	[M-H]-	10-Heptadecenoic Acid	Lipids	Free fatty acids	29743-97-3	1	69720	77746	72120	10984	12551	6761.9	9294.5	6216.5	9365.7	6432.5	8866.8	8227.4	5636.8	11183	7056.5	48294	51384	43987	21467	20226	24334	5931.6	8327.3	9763.2	3860.5	10400	8212.6	9	6873.4	5442.4	18537	15230	14707	17215	--	--
Lmmn003323	271.23	225.22	272.235	C16H32O3	[M-H]-	2-Hydroxyhexadecanoic acid	Organic acids	Organic acids	764-67-0	1	308360	315800	318640	387120	432740	461710	131210	98673	104210	200070	96724	80266	99082	126230	100840	512600	460140	476490	485020	507330	462870	115170	96641	95311	1337800	1390000	1329600	1463800	1533800	1374000	507770	496670	492810	490740	--	--
pmp001264	274.27	256.27	273.267	C16H35NO2	[M+H]+	Hexadecylsphingosine	Lipids	Sphingolipids	-	2	2102500	2563500	2001800	2427200	2484100	2639800	1672700	1671600	2058000	2319900	2059100	1836800	2063300	1962900	2020400	2970100	3203900	3199700	2314200	2316600	2689200	2519900	2639800	2579300	1920200	1840800	1770000	1950200	1897800	1754300	2261600	2195400	2160500	2158700	--	--
MWSmce356	275.07	114.02	274.25	C5H14N4O7S	[M+H]+	L-Canavanine sulfate	Amino acids and derivatives	Amino acids and derivatives	2219-31-0	3	34372	26522	33788	31311	44594	47906	139010	127380	126350	85231	89123	63006	120380	85238	77442	54533	34162	31333	37626	40754	44072	35324	39166	24166	40925	59008	65944	61481	78282	84389	131520	76817	80571	70104	--	--
Lmrj002793	277.12	120.08	276.112	C14H16N2O4	[M+H]+	Cyclo(Phe-Glu)	Amino acids and derivatives	Amino acids and derivatives	-	3	7509.7	6331.7	2951.6	4073.4	2694.6	4400.8	2811.8	4311.7	3476.2	3034.2	4610.8	4718.5	3473.6	4898.3	3287.7	2449.3	2755.6	2008	2572.9	1300	2387.9	2158.6	1500.9	2904.6	1355.8	2046.1	3158.7	3554.4	2830.6	3799.2	3300	3278.6	3728	2933.7	--	--
pme1712	275	257	276.132	C11H20N2O6	[M-H]-	L-Saccharopine	Amino acids and derivatives	Amino acids and derivatives	997-68-2	3	13720	13440	7609.8	23484	22575	13405	16389	8418.6	12362	20054	17032	19442	15001	18202	16342	4068.3	5981	7893.5	7304.7	8288.2	11903	7496.6	9510.6	7484.5	6331.7	8244.2	7927	7624.6	10397	8223.9	6877.4	15030	13146	11632	C00449	ko00300,ko00310,ko01100,ko01110,ko01230
pmb1574	277.2	93	276.209	C18H28O2	[M+H]+	9,12-Octadecadien-6-Ynoic Acid	Lipids	Free fatty acids	61481-29-6	3	11215	14627	16521	16423	21284	20701	37360	38405	42555	42376	41785	44934	71926	77923	75382	34486	33014	31738	23486	20907	20331	10122	10536	10345	98433	90628	80224	204460	179260	196270	45920	50642	47128	50009	--	--
MWSslk154	277.13	115.04	276.28	C12H20O7	[M+H]+	Triethyl citrate	Organic acids	Organic acids	77-93-0	3	805520	830610	763310	1499200	1522800	1557100	209410	221020	213660	206650	186380	191340	359250	337030	358040	2244200	2169500	2205500	1639200	1501900	1485300	366230	393520	364780	286170	273760	287980	106540	105220	101670	755780	729210	712610	696680	--	--
Zmdp001663	279.1	133.03	278.094	C10H18N2O5S	[M+H]+	γ-glutamylmethionine	Amino acids and derivatives	Amino acids and derivatives	17663-87-5	3	12678	14020	16684	11283	17894	20727	8731.9	8763.1	6820.6	7187.6	9511.8	7935	10520	12561	14983	11956	9258	9280.3	12785	16269	8403.8	3364.6	1884.8	2331.4	9	9	9	9	9	9	6048.4	12651	6627.2	11322	--	--
mws5035	279.17	120.08	278.163	C15H22N2O3	[M+H]+	L-Leucyl-L-phenylalanine	Amino acids and derivatives	Amino acids and derivatives	56217-82-4	3	5516.1	5299.6	6625.7	12916	8722.9	7475.3	7016.1	6554.1	7136.5	6442.1	5674.4	5964	7597.4	5747	3958.3	5431.2	6829.6	5452.7	6594.7	5867.2	7442.5	5137.9	9493	7337.7	5866.3	6339.4	5381.4	2605.9	4752.2	4134.9	7061.7	4998.6	3561.4	6942.6	--	--
Lmbn005923	277.22	59.01	278.225	C18H30O2	[M-H]-	Crepenynic acid	Lipids	Free fatty acids	2277-31-8	1	20148	21986	23603	33666	31841	35324	11037	12897	12237	11577	11665	14092	13241	14155	11698	25956	24819	24244	17486	18353	20303	25717	25884	25189	36718	38705	36309	39394	35752	38467	28313	25042	25183	21820	C07289	ko00591
pmb0889	279.23	95.1	278.225	C18H30O2	[M+H]+	Punicic acid (9Z,11E,13Z-octadecatrienoic acid)	Lipids	Free fatty acids	544-72-9	1	131460	142240	135730	111290	110840	112280	131520	129060	135130	155630	146680	151460	191850	227760	211610	156650	162130	157270	124810	121560	118880	59854	73184	79858	171680	169640	149760	293540	272650	288890	139820	136000	129170	136210	C08364	--
pmb1650	279.2	149.4	278.225	C18H30O2	[M+H]+	Octadeca-11E,13E,15Z-trienoic acid	Lipids	Free fatty acids	25575-00-2	3	8054900	8617100	7876600	13742000	14541000	13614000	2914100	2890000	2677500	2870300	2912500	2831500	3662100	3550700	3618100	16762000	16059000	16538000	13836000	13995000	14927000	4285000	4613300	4484200	3609100	3405000	3341800	1721900	1843100	1702200	8188400	7604300	7327000	7015200	--	--
mws0367	277.22	277.22	278.225	C18H30O2	[M-H]-	α-Linolenic Acid	Lipids	Free fatty acids	463-40-1	1	12605000	13357000	13769000	19295000	19041000	19764000	7787400	7835500	7237200	7478100	7235200	7577500	7492700	8854400	7522300	16142000	15158000	14784000	10908000	11060000	10704000	14467000	15416000	15003000	21968000	21027000	20811000	22195000	21365000	20804000	15467000	14246000	14006000	13593000	C06427	ko00592,ko01040,ko01100,ko01110
mws0629	281.11	166	280.106	C13H16N2O5	[M+H]+	L-Aspartyl-L-Phenylalanine	Amino acids and derivatives	Amino acids and derivatives	13433-09-5	1	106360	101940	106100	96519	103900	100640	63874	61291	73024	79423	61038	55199	74465	75902	78964	38220	38303	40808	39769	42088	38193	57134	66788	69195	47359	54921	43446	42046	39943	38550	67345	69027	58526	55089	--	--
mws1491	279.23	279.23	280.24	C18H32O2	[M-H]-	Linoleic acid	Lipids	Free fatty acids	60-33-3	1	1483200	1525800	1493600	1879100	1558300	2191400	797670	906380	855720	821010	832940	752530	707090	1163500	798230	1651300	2161200	1881200	1605400	1521700	1655500	1690100	1710000	1438300	2138700	2518700	2172100	2341700	2521000	2363800	1921200	1874500	1840700	1822500	C01595	ko00591,ko01040,ko01100
Hmhp001812	282.12	136.06	281.112	C11H15N5O4	[M+H]+	2'-O-Methyladenosine	Nucleotides and derivatives	Nucleotides and derivatives	2140-79-6	1	29944	28869	29249	41906	42499	44176	120620	114880	131020	142850	147320	128080	123820	111770	119090	85758	79912	71051	68869	68284	76724	56957	57715	59016	79516	63256	77434	43283	36817	38689	75259	74340	71121	68542	--	--
YC512118	282.28	247.24	281.272	C18H35NO	[M+H]+	Oleamide (9-Octadecenamide)	Lipids	Free fatty acids	301-02-0	1	83491	64984	60278	37160	37691	41128	36282	37232	38765	29883	26974	30013	24110	27958	24175	51284	39421	34365	39287	30003	22765	33035	41083	49779	27637	24565	22278	12589	12593	11371	36156	38282	29729	34728	C19670	--
mws2623	281.25	281.25	282.256	C18H34O2	[M-H]-	11-Octadecanoic acid(Vaccenic acid)	Lipids	Free fatty acids	506-17-2	1	846830	665840	807210	1639500	1789600	1963400	2173000	2532800	2353400	2259400	2142500	2422100	2367500	2498800	2600800	832270	853350	860270	559320	548820	553930	2072800	2168300	2342400	2693100	2751500	3314400	3280900	3866000	3068700	2709900	2621300	2529600	2427300	C21944	--
pme1178	284.1	152	283.092	C10H13N5O5	[M+H]+	Guanosine	Nucleotides and derivatives	Nucleotides and derivatives	118-00-3	1	1159100	1130500	964430	1005800	886500	957960	437660	415550	388060	1081200	1051900	1149900	597320	533550	549850	2039200	1937300	1849800	2166600	2058000	1868600	1342700	1509800	1307500	1541500	1408200	1382900	3493500	3408800	3251700	1513000	1233700	1228800	1275000	C00387	ko00230,ko01100,ko02010
mws0668	283.07	151	284.076	C10H12N4O6	[M-H]-	Xanthosine	Nucleotides and derivatives	Nucleotides and derivatives	146-80-5	1	39364	39964	36677	25253	23974	28179	23331	21016	18581	71604	81115	65415	21477	30566	34254	83158	88235	81523	99696	95044	95703	105260	115550	94544	78303	67867	76585	86643	79704	65954	53344	57114	48115	57606	C01762	ko00230,ko00232,ko01100,ko01110,ko02010
mws1489	283.26	283.26	284.272	C18H36O2	[M-H]-	Stearic Acid	Lipids	Free fatty acids	-	1	46686	41697	34781	49224	42663	42612	17110	23905	20599	21689	23166	23249	16955	14661	22126	54971	53632	49640	41476	49921	56477	21293	22771	19383	21573	22147	20461	26259	30910	26812	19520	19790	13316	18680	C01530	ko00061,ko01040
pma1751	286.09	124	285.085	C12H15NO7	[M+H]+	N-(beta-D-Glucosyl)nicotinate	Others	Vitamin	-	3	169640	177790	164450	305710	259930	279790	56686	67776	67773	61588	63381	66557	46156	37951	42184	260900	262410	246350	196060	181090	236920	201780	194450	208720	185160	177420	195880	135740	107260	86016	157200	139760	150070	143860	--	--
Zmyn005252	285.24	239.24	286.251	C17H34O3	[M-H]-	3-Hydroxy-palmitic acid methyl ester	Lipids	Free fatty acids	51883-36-4	3	3513.7	2267	1739	1635.3	2105.7	2227.3	2224.3	1197.2	1831.1	2858.6	2763.8	1360.3	1681.7	3785.8	2155.4	3538.2	3112.9	2142.5	2550.3	2605.5	1435.7	1388.1	1517.9	1524.1	2890.3	2356.5	2748.4	4266.2	3188	2964.4	2016.4	1875.5	978.42	1252.4	C11849	--
pmn001686	287.22	241.22	288.23	C16H32O4	[M-H]-	10,16-Dihydroxypalmitic acid	Lipids	Free fatty acids	3233-90-7	1	13807	15855	13899	18034	20069	22515	10175	9904.9	10061	10720	12575	10610	11099	14425	13297	14300	14385	12613	17368	15518	15927	19999	19101	18679	22848	22844	19627	27577	22682	23434	14620	15780	12954	12875	C08285	ko00073
Lmyn007883	287.22	287.22	288.23	C16H32O4	[M-H]-	9,16-Dihydroxypalmitic acid	Lipids	Free fatty acids	38076-49-2	2	580290	640680	635240	814750	858940	767970	457900	439640	436850	469440	473830	429370	485200	648000	566470	600400	609350	531780	705670	721490	633500	751440	729960	823930	1155600	969940	956960	1084700	992060	947510	655720	624050	606180	567490	--	--
pmb3081	289	97	290.004	C6H11PO11	[M-H]-	Glucarate O-Phosphoric acid	Others	Saccharides and Alcohols	-	3	6217700	5363400	4886000	11189000	9637200	9836600	2089900	2781100	2636600	3745700	3145800	2026000	2275300	4962300	2885900	6038200	4963800	4868700	4819300	4343100	3653200	3524400	2083900	2202100	2433000	3123300	2802500	1960800	1965700	1672300	7204400	6240100	4978700	4237500	--	--
Lmyn003835	289.04	137.02	290.043	C14H10O7	[M-H]-	4-(3,4,5-Trihydroxybenzoxy)benzoic Acid	Organic acids	Organic acids	-	2	11131000	10021000	11294000	10046000	12682000	11572000	10357000	8958000	8719400	8093100	8592400	9779600	9952300	12072000	8306000	6528400	5297600	5771300	5911900	6133900	6249200	6904600	6527800	6695800	4854500	4811800	5886900	1274000	1286500	1439300	8688200	7079800	7748300	7467500	--	--
pmb2657	289.1	97.1	290.123	C10H18N4O6	[M-H]-	Argininosuccinic acid	Organic acids	Organic acids	2387-71-5	3	27141	39664	34519	29959	35330	35571	11515	13340	11254	14166	9260.3	12573	10776	15927	10784	18674	19556	20393	18236	14626	18554	14412	24364	21469	10440	9184.5	12218	6232.4	7760.7	6217.9	15464	13954	16642	13730	C03406	ko00220,ko00250,ko01100,ko01110,ko01230
pmf0314	289.25	157	290.261	C20H34O	[M-H]-	(+)-cis-Abienol	Others	Saccharides and Alcohols	17990-16-8	3	4458.4	4418.4	4760.4	4588.8	4435.7	4005.9	3136	4870.6	3745.8	4236.9	3952.2	4603.1	5693.6	4760.8	3829.9	3600.2	3073.5	6872	5019.4	3064.1	3779.2	4065.4	4039.3	3774.6	4077.4	4470.9	4306.6	4533.9	4673.1	5328.5	3998.5	5003	3998.4	5335.7	--	--
mws2120	291.01	247.02	292.022	C13H8O8	[M-H]-	Brevifolin carboxylic acid	Organic acids	Organic acids	18490-95-4	2	594660	664920	634090	531230	513090	605030	247580	209310	247970	174670	211340	188140	206860	328850	193850	671360	733800	608960	636330	703820	616840	418420	344880	337100	226800	277690	281250	96343	78329	69498	549710	483140	470480	471420	--	--
MWSmce689	293.25	95.09	292.46	C19H32O2	[M+H]+	Methyl linolenate	Lipids	Free fatty acids	301-00-8	2	173000	216030	212560	182320	164850	176720	20810	23176	19616	16603	17938	18408	18240	15307	18014	227130	147090	149250	169450	102090	96802	42033	59811	56114	52369	52550	55595	34435	36099	37336	111360	99021	102000	97290	--	--
Zmdn001564	293.11	164.07	294.122	C14H18N2O5	[M-H]-	γ-Glutamylphenylalanine	Amino acids and derivatives	Amino acids and derivatives	7432-24-8	3	12467	16519	16733	5628.9	5692.6	5946.5	27953	34468	25406	19976	28207	19802	30146	37441	23972	9	4057	9	7787.2	5913.3	9	9	9	9	5070.3	9	9	9	9	9	14453	12198	11014	9926.5	--	--
Zmyn004676	293.21	113.1	294.219	C18H30O3	[M-H]-	17-Hydroxylinolenic acid	Lipids	Free fatty acids	-	2	20028	19234	17313	23021	23133	22076	28487	24079	27049	32484	34286	31624	26987	37603	22899	16104	13854	13990	9967.2	10236	9636.5	19892	19749	18109	12321	17007	12794	11366	12005	10693	19736	17894	17472	17075	C16346	ko00592
pmb2792	293.21	193.1	294.219	C18H30O3	[M-H]-	13-Hydroxy-6,9,11-octadecatrienoic acid	Lipids	Free fatty acids	74784-20-6	2	36579	35742	37813	35088	38277	36444	39412	37036	36593	38656	41919	40385	42388	48342	43102	37158	34019	37988	38291	37818	38514	38721	35146	42470	34248	37752	34899	32147	28037	31666	33825	37408	40381	33773	--	--
Zmyn004732	293.21	185.12	294.219	C18H30O3	[M-H]-	2R-hydroxy-9Z,12Z,15Z-octadecatrienoic acid	Lipids	Free fatty acids	-	2	4664.3	4749.1	5880.1	8228.5	7832.3	8088.1	7979.7	8265.1	7237.3	8429.7	9155.3	8651.9	13802	27546	17738	2459.4	2746.7	2532.2	2182.5	2326.5	2188.1	1948.9	2785.9	1825.5	14442	13785	11115	21134	21195	16835	9007	6777.9	8136.9	7451.2	C16342	ko00592
Lmqp000329	296.07	104.11	295.056	C8H14N3O7P	[M+H]+	5-Aminoimidazole ribonucleotide	Nucleotides and derivatives	Nucleotides and derivatives	25635-88-5	1	109300	105790	107740	426180	315630	359820	2418800	2408400	1964200	2217200	1752000	2319600	2255500	2051300	2234600	799560	694200	792450	533680	594880	492930	3167200	3554800	3406400	5304100	4004600	3898000	5178200	6752600	7074900	1991800	1729500	1528700	1663100	--	--
Lmbn005369	295.23	195.14	296.235	C18H32O3	[M-H]-	13(S)-HODE;13(S)-Hydroxyoctadeca-9Z,11E-dienoic acid	Lipids	Free fatty acids	10219-69-9	1	72162	76309	76209	49885	49756	53828	42814	42450	43681	54383	48490	47058	52566	72052	48965	81693	76255	75907	60967	58287	54207	30477	32028	35129	24563	25391	22906	29678	22236	24284	44863	45067	40179	42308	C14762	ko00591
Rfmb091	295.23	195.14	296.235	C18H32O3	[M-H]-	9S-Hydroxy-10E,12Z-octadecadienoic acid	Lipids	Free fatty acids	15514-85-9	1	61179	65476	64017	47453	44595	48023	39036	38403	38657	47272	45629	39033	49057	65854	44577	74320	67954	68458	55439	55967	48217	31123	31937	32154	23238	24197	22717	26845	23097	22073	39823	41465	37348	34565	C14767	ko00591
Lmbn005662	295.23	171.1	296.235	C18H32O3	[M-H]-	9(10)-EpOME;(9R,10S)-(12Z)-9,10-Epoxyoctadecenoic acid	Lipids	Free fatty acids	16833-56-0	1	2053.3	1084.8	1353	1806.3	1763.6	1858.6	950.51	1601.8	1175.2	1498	2355.1	1586.4	1801.6	3157.4	1573.1	1044.7	1247.4	942.05	557.77	974.72	803.22	1111.7	1083.3	1300.4	1478.6	1760	1373.3	2665.1	3398.1	2866	1391.4	1759	1717.8	1516.1	C14825	ko00591,ko01100
mws0131	297.32	251.14	296.308	C20H40O	[M+H]+	Phytol	Lipids	Free fatty acids	7541-49-3	3	9	9	9	9	9	9	9	9	2436.9	2016.8	1902.9	2176.9	9	9	9	9	9	9	9	9	9	2841.2	4064.8	2481.2	4850.9	6195.5	4312.2	5106	5562.9	5891.5	3509.8	4398.4	3316.6	3622.4	C01389	--
pme1474	298.1	136	297.09	C11H15N5O3S	[M+H]+	5'-Deoxy-5'-(methylthio)adenosine	Nucleotides and derivatives	Nucleotides and derivatives	2457-80-9	1	634790	577410	662210	520170	496690	541640	533190	604090	585640	892070	895120	821880	472090	477630	469230	1497400	1405100	1319000	1519300	1363500	1331500	525630	455070	483390	348470	362050	332590	295290	307490	316500	565990	594220	599060	687330	C00170	ko00270,ko00908,ko01100
pmb0197	298.1	166.3	297.107	C11H15N5O5	[M+H]+	N7-Methylguanosine	Nucleotides and derivatives	Nucleotides and derivatives	20244-86-4	3	2472	6372	6535.8	9	9	9	22559	14538	14200	15458	10346	13766	25753	14762	20274	25986	25091	13590	23195	19152	16787	20190	24818	22646	58083	47801	51158	67184	62121	63862	19516	17519	25703	33641	C20674	--
Lmbn009444	297.24	183.14	298.251	C18H34O3	[M-H]-	Ricinoleic acid	Lipids	Free fatty acids	141-22-0	2	2288.6	3159.5	2625.1	2422.7	3647.8	2414.2	4368.9	4072.5	3596.8	4704.7	4001.7	3464.5	2931	4600	2599.9	4464.5	4046.3	3943.7	3139.1	1380.8	1959.6	4366	4038.7	3145.6	4175.7	4577.2	3286.3	3630.5	3756.2	3255.2	3384	3158.4	3215.7	3179.9	C08365	--
pmf0297	297.32	183.1	298.324	C20H42O	[M-H]-	1-Eicosanol	Lipids	Free fatty acids	629-96-9	3	1653.2	2439.9	2308.7	2543.2	1732.9	3045.7	3365.5	3045.8	3398.3	3670.1	3265.4	3290.4	2980.9	2768.2	1894.2	3747.5	2935.1	2693.7	2793	2393.8	2201.7	4432.6	3097.8	3223.8	4006.7	6153	3737	4126	4051	3131.2	4249.1	3401	2764.2	2724.2	--	--
Zmhn001358	299.08	137.02	300.084	C13H16O8	[M-H]-	4-O-Glucosyl-4-hydroxybenzoic Acid	Organic acids	Organic acids	-	1	1455700	1605100	1605500	1103000	1070500	1140800	9482500	11508000	10946000	12579000	13157000	12481000	16801000	22384000	14662000	1877900	1522600	1598800	2052100	2269500	2237600	2558600	2498900	2779300	3331500	3099800	3037600	1471300	1530600	1324700	6172900	5725100	5098000	4830800	--	--
Zmhn001926	299.08	137.02	300.084	C13H16O8	[M-H]-	1-O-Salicyl-D-glucose	Organic acids	Organic acids	60517-74-0	1	1525600	1462900	1258300	1287200	1006500	1241200	10796000	11499000	11450000	13240000	13150000	12499000	17074000	22232000	13809000	1721700	1466600	1572100	2220700	2148500	2191900	2413100	2579800	2358400	3099700	3476300	3489900	1407600	1794200	1275400	5872700	5546600	4955500	5506500	--	--
Hmtn001302	299.08	137.02	300.085	C13H16O8	[M-H]-	Glucosyloxybenzoic Acid	Organic acids	Organic acids	-	1	1439300	1451000	1562900	1159200	988540	1130300	10827000	11538000	11444000	12701000	13376000	12211000	17009000	24280000	14146000	1615200	1631500	1603700	2732200	2428400	2345000	2411900	2058700	2523300	3053800	3561000	3531300	1550100	1778600	1359400	5778000	5550600	5137700	5011000	--	--
pmb3142	299.1	137.1	300.085	C13H16O8	[M-H]-	Salicylic acid-2-O-glucoside	Organic acids	Organic acids	10366-91-3	3	305410	264880	295960	435910	434410	432110	487110	721990	598430	828330	766770	737040	829600	890590	826120	625510	709410	614620	556980	584920	559710	387700	386370	446850	492540	372210	433210	227920	293020	262360	471750	513780	483880	432550	--	--
Zmyn005384	299.26	253.26	300.266	C18H36O3	[M-H]-	2R-Hydroxyoctadecanoic Acid	Lipids	Free fatty acids	26633-48-7	2	8026.4	6301.4	5856.9	4524.9	3479	5770.3	5994.2	3561.7	4765.4	6857.3	4515.2	4257.4	3859.8	7915.7	4088.2	6342.7	5184	4720.4	5761.1	5025.9	3838.7	4095.5	4068.2	4050.5	5104.4	4173	5960.7	7013.9	4759.8	4754	4217.1	4623	4790	5167.7	C03042	--
mws1349	302.31	60.04	301.298	C18H39NO2	[M+H]+	Dihydrosphingosine	Lipids	Sphingolipids	764-22-7	3	23903	21647	21224	34685	32641	38843	31890	32356	36964	39275	29632	33458	28086	28968	26857	21396	24146	25293	25131	28020	23352	12992	16309	17342	9962.6	9656.8	9365.6	12042	13617	11651	29353	31903	31309	29357	C00836	ko00600,ko01100
Zmhn000892	301.09	139.05	302.1	C13H18O8	[M-H]-	4-O-Glucosyl-3,4-dihydroxybenzyl alcohol	Organic acids	Organic acids	-	2	21805	35766	30556	37946	19038	29046	17984	20309	12259	23878	22596	20649	15271	27092	21373	55180	39100	56519	37898	47105	30002	32350	52087	35736	33103	31827	40342	42482	37932	22959	26691	26672	29655	34376	--	--
Hmsn002598	301.09	139.04	302.1	C13H18O8	[M-H]-	Salirepin	Organic acids	Organic acids	26652-12-0	2	69361	20200	11498	44258	79022	67393	110650	119850	100630	123850	121750	138900	163980	222520	124500	24173	24195	21660	35817	28027	27119	49777	58012	21213	39515	41599	41541	10009	15370	6416.8	90539	76678	71928	60420	--	--
MWSmce549	303.25	57.07	302.45	C17H34O4	[M+H]+	1-Monomyristin	Lipids	Free fatty acids	589-68-4	3	172070	201580	167710	189100	185760	197070	292810	265360	289820	271410	239890	248350	216530	236430	220600	150530	134290	160250	164350	139650	127050	151570	155910	157790	305400	292600	299710	383060	357580	332100	155110	145400	139040	152410	--	--
pme1086	306.08	143	307.084	C10H17N3O6S	[M-H]-	Glutathione reduced form	Amino acids and derivatives	Amino acids and derivatives	70-18-8	1	167270	190200	141670	195670	282020	228750	40565	15897	17990	23067	32460	50358	40102	27168	27529	59994	41796	34844	58945	53363	46072	70138	105330	99297	85089	45802	49809	155180	174010	131660	118750	122100	85208	130750	C00051	ko00270,ko00480,ko01100,ko01240,ko02010
pmn001610	307.26	307.3	308.272	C20H36O2	[M-H]-	Eicosadienoic acid	Lipids	Free fatty acids	5598-38-9	3	27479	31956	31257	36930	42007	46463	13092	15857	15213	19652	10209	15265	14881	14643	16844	51947	53312	58376	37046	35142	38040	38297	37767	37667	51749	48884	47887	38771	37694	35682	36229	36853	36577	34919	C16525	ko01040
pmb2791	309.21	209.1	310.1	C18H30O4	[M-H]-	9-Hydroperoxy-10E,12,15Z-octadecatrienoic acid	Lipids	Free fatty acids	111004-08-1	3	8224.8	7914.6	9187.2	9244.2	9886.5	7865.9	10976	6895	8493	9969.6	9144.2	7658.5	7887.7	8400.4	9310.5	7083.2	7963.4	7922.9	8058.9	6186.2	9354.8	8898.2	5745.6	8787.4	7498.1	8002.5	10063	13297	9886.1	8141.8	7024.5	5431	4372.4	5489.1	C16321	ko00592,ko01110
Lmsn004674	309.1	147.05	310.105	C15H18O7	[M-H]-	1-O-cinnamoyl-β-D-glucose	Organic acids	Organic acids	40004-96-4	2	9	9	1040.9	9	9	9	59636	57206	54614	80110	84477	85842	79858	124580	76379	9	9	9	9	9	9	9	9	2767.7	12131	10951	6941.5	5192.8	9	4618.3	20178	26177	20799	18643	--	--
Zmdp001857	311.12	165.05	310.116	C14H18N2O6	[M+H]+	γ-Glutamyltyrosine	Amino acids and derivatives	Amino acids and derivatives	7432-23-7	1	149830	160280	164470	30540	30180	32113	93656	92234	91975	89675	92897	80505	180710	182660	160910	17525	17039	14870	31934	26123	28009	22570	19150	22465	5545.5	6826.5	9559.1	7117.1	6950.2	6880.5	64539	51411	48672	59495	--	--
Zmyn004449	309.21	171.1	310.214	C18H30O4	[M-H]-	9-Hydroxy-12-oxo-10(E),15(Z)-octadecadienoic acid	Lipids	Free fatty acids	-	2	396.53	1052.8	997.44	1198.5	582.63	1506.6	1493.1	1660.2	1156.4	1284.8	1087.8	2193	2003.3	2490.8	2514.5	9	424	371.62	9	9	274.64	823.74	1338.1	830.32	5630.5	6586.4	5874.1	11236	10292	9114.8	2194.3	2034	2118	2084.2	C21923	ko00592,ko01110
Zmzn003953	309.2	227.2	310.214	C18H30O4	[M-H]-	13(s)-hydroperoxy-(9z,11e,15z)-octadecatrienoic acid	Lipids	Free fatty acids	67597-26-6	1	236190	191820	181200	124410	123500	124260	274540	286890	272540	301650	267000	258770	279320	357740	290730	217670	207700	209030	165370	149330	142970	325590	329760	341480	524940	530270	541080	534740	563380	548570	341740	345010	332940	327290	C04785	ko00592,ko01100,ko01110
Hmqp006221	311.26	279.32	310.25	C19H34O3	[M+H]+	13-Hydroxy-9Z,11E-octadecadienoic acid	Lipids	Free fatty acids	18104-45-5	3	9	9	9	3915.5	3327.8	3590	3260.9	5112.1	3768.2	3585.1	2090.2	4318.7	2411.4	2053.6	2011.3	9	9	9	9	9	9	13146	20123	14158	36053	36812	33444	27468	37067	38932	24195	22428	20814	23664	--	--
Lmcp002302	312.13	180.09	311.123	C12H17N5O5	[M+H]+	N6-(2-Hydroxyethyl)adenosine	Nucleotides and derivatives	Nucleotides and derivatives	4338-48-1	2	199290	209320	200820	221250	223970	220250	213520	170060	204440	295190	297810	273330	254420	271880	273830	424130	463520	349570	432720	352480	376380	374350	394720	374810	298940	268510	264240	395790	375430	363100	308440	284670	280180	280840	--	--
pme3967	312.13	180	311.123	C12H17N5O5	[M+H]+	2-(Dimethylamino)guanosine	Nucleotides and derivatives	Nucleotides and derivatives	2140-67-2	2	139970	132640	133470	150290	159900	167990	138490	132860	156100	212420	209470	171800	210790	196150	186820	263090	307660	253650	358560	283460	276670	252150	248910	267650	202890	182910	207590	253970	267210	249680	230120	193470	196830	202760	--	--
Lmtn003441	311.11	149.06	312.121	C15H20O7	[M-H]-	2-Acetyl-3-hydroxyphenyl-1-O-glucoside	Organic acids	Organic acids	-	2	167810	143390	118890	103510	101910	94453	55313	50120	45884	52808	36446	50090	29702	61437	33911	11210	12316	11443	11135	12172	10700	3591.9	4137.7	5652.2	1673.5	1491.4	2636.9	9	9	9	37977	31505	32808	37319	--	--
Rfmb087	311.22	293.21	312.23	C18H32O4	[M-H]-	9-Hydroxy-13-oxo-10-octadecenoic Acid	Lipids	Free fatty acids	-	3	3718.1	2216.6	2103.1	3355.7	4377.2	5000.7	15895	18940	17692	19801	22775	20742	29610	42323	31137	1642.6	857.82	1371.7	3033.8	1132.2	416.36	4402	6274.3	4796.1	18678	15163	14146	25476	20943	16718	14219	13736	12242	10009	--	--
pmb2804	311.1	171.3	312.23	C18H32O4	[M-H]-	13S-Hydroperoxy-9Z,11E-octadecadienoic acid	Lipids	Free fatty acids	33964-75-9	3	2006.9	1730.2	1501.5	2219.2	2491	1582.2	8816.5	10949	9064.5	10358	11014	9978	14429	27629	17504	1608.7	1607.3	3796.1	1193.7	1380.7	1265	710.36	843.62	897.92	7964.5	7728.2	8518.7	16673	12621	13108	8949.5	6345	5794	6317.3	C04717	ko00591,ko01100
Lmbn005287	311.22	249.22	312.23	C18H32O4	[M-H]-	7S,8S-DiHODE; (9Z,12Z)-(7S,8S)-Dihydroxyoctadeca-9,12-dienoic acid	Lipids	Free fatty acids	143288-65-7	1	12030	12886	11460	21201	18647	20075	93626	92695	92552	103020	97927	89953	101490	134920	115570	13411	13023	12329	15038	14208	14950	55407	53255	55331	57733	45894	45572	62927	58889	50507	50031	44422	47396	46901	C07354	ko00591
Lmmn002179	313.09	107.05	314.1	C14H18O8	[M-H]-	Methyl salicylate-2-O-glucoside	Organic acids	Organic acids	10019-60-0	2	64428	53905	66853	49341	46201	62043	40528	50417	56270	50418	60737	56746	46443	60371	38777	30904	26913	31719	29931	27284	25422	27733	26001	29881	29466	23883	36925	15002	16751	12866	44775	36586	41364	32398	--	--
Lmbn005487	313.24	251.24	314.246	C18H34O4	[M-H]-	12,13-DHOME; (9Z)-12,13-Dihydroxyoctadec-9-enoic acid	Lipids	Free fatty acids	263399-35-5	1	39572	42675	43755	28545	28018	27845	119730	104520	107980	105300	92582	92924	91547	115480	99542	13524	15148	12027	16375	14548	15087	54239	54381	54564	74996	63709	63119	56847	50119	45011	65530	61471	53306	50637	C14829	ko00591
Lmbn007891	313.24	183.14	314.246	C18H34O4	[M-H]-	Hydroxy ricinoleic acid	Lipids	Free fatty acids	-	3	991.12	1160.4	995.39	9	9	1049.2	894.71	9	730.13	1020.7	998.87	620.03	1225.7	2074.7	9	1245.3	1102.6	1422.2	942.74	1147.7	1227.6	920.8	753.6	724.62	2347.2	1334.9	3138.2	1203.3	1445.5	626.14	1538.3	1330.6	1051.7	1353.7	--	--
pmb2871	315.07	153	316.079	C13H16O9	[M-H]-	1-O-Gentisoyl-D-glucoside	Organic acids	Organic acids	23445-11-6	1	136660	160470	186090	72781	83362	76263	107620	92998	93852	84477	79554	88030	150060	109270	79465	54912	39767	70825	45631	45292	59374	21680	28084	29577	48294	40170	56279	54627	48269	50311	68644	59680	65944	59820	--	--
pmn001367	315.07	153.02	316.079	C13H16O9	[M-H]-	Protocatechuic acid-4-O-glucoside	Organic acids	Organic acids	-	1	345340	366920	338760	186890	123960	189170	225430	272670	191500	204250	252750	247280	224500	246620	234820	154630	183630	136570	146130	143500	120940	60409	66706	54482	77386	63659	85606	84106	69918	67418	112890	143310	104850	151390	--	--
Zmtn001661	315.11	153.02	316.116	C14H20O8	[M-H]-	Vanilloloside	Organic acids	Organic acids	74950-96-2	2	327530	360730	313870	189620	156070	181630	224810	224190	218270	244100	244430	249680	288320	274350	227090	108290	126390	125110	127390	141730	152270	55810	45953	59838	78704	64660	75093	81394	68395	59778	151850	156580	121930	125410	--	--
Hmtn001120	315.11	153.06	316.116	C14H20O8	[M-H]-	5-(2-Hydroxyethyl)-2-O-glucosylphenol	Organic acids	Organic acids	-	1	3760200	3891000	4223000	3525500	3278100	3536500	2310200	2281800	1900300	2379900	2071200	1879200	1665100	1989400	1732000	2949900	2922500	2640400	2739300	2741500	2795600	2074300	2027800	2108200	1915900	1650700	1939100	1138300	1106200	1082500	2486500	2257600	2253100	2651900	--	--
pmb2221	318.3	60.1	317.293	C18H39NO3	[M+H]+	4-Hydroxysphinganine	Lipids	Sphingolipids	554-62-1	2	835510	718220	668660	877110	896100	901050	1379200	1344600	1361600	1019800	925510	948440	1328900	1424600	1324200	584490	588080	592260	615590	593730	609140	720700	750760	792930	736510	656630	707750	1044900	1144400	1057200	1044600	1025300	1030700	1037000	C12144	ko00600,ko01100
pmb0751	321.1	147.3	320.09	C16H16O7	[M+H]+	Trans-5-O-(p-Coumaroyl)shikimate	Organic acids	Organic acids	-	3	3801	4282.2	3335	4871.7	3550.8	3127.3	20233	21817	17848	29683	25144	23243	29988	21342	26757	18219	17555	18930	13650	13693	14445	22238	26804	24533	294140	275530	251070	430150	361520	435080	76272	65348	70007	60764	C02947	ko00940,ko00941,ko00945,ko01100,ko01110
mws0582	322.11	130	321.099	C11H19N3O6S	[M+H]+	S-(Methyl)glutathione	Amino acids and derivatives	Amino acids and derivatives	2922-56-7	3	180050	132850	108220	409560	273110	410740	2318600	2365600	2381700	2364300	2077600	1243200	2498200	1366900	2084200	53491	25802	49253	41311	46426	64298	612990	815510	1038600	261410	261710	306030	277430	140200	271830	586160	748460	609670	533240	C11347	--
pme2074	322.4	129.7	323.21	C18H29NO4	[M-H]-	(-)-Jasmonoyl-L-Isoleucine	Amino acids and derivatives	Amino acids and derivatives	120330-93-0	3	12810	10393	9997	12387	8258.4	10493	9	9	9	9	9	9	9	9	9	18892	18864	19853	21688	20424	20769	3186.6	2071	2590.3	9	9	9	9	9	9	5745.7	5917.2	5288.1	5294.5	C18699	ko04075
Hmqp006023	326.27	309.27	324.266	C20H36O3	[M+H]+	Ethyl 9-Hydroxy-10,12-octadecadienoic acid	Lipids	Free fatty acids	-	3	2391.7	2842.5	2135.4	841.06	994.17	1150.1	2369.9	2353.4	1860.8	2099.3	1019.1	1104.2	1557.6	1284.1	1211	2621.1	2753.5	1896.2	1779.4	1205.8	1680.6	426.89	630.52	193.51	658.03	463.35	825.44	500.4	527.59	448.02	1298.3	1589	1590.8	1109.8	--	--
Lmsn003111	325.09	145.03	326.1	C15H18O8	[M-H]-	1-O-p-Coumaroyl-β-D-glucose	Organic acids	Organic acids	7139-64-2	1	22205	18564	24757	16841	14481	18019	26287	45237	36722	31616	38707	31826	42506	65354	35685	12499	12216	11519	5661.8	13417	9082.4	56806	60141	58398	99757	87585	97283	634450	670510	778620	47065	38072	41696	46414	C16827	--
MWSmce278	327.19	159.08	326.43	C21H26O3	[M+H]+	Acitretin	Others	Vitamin	55079-83-9	2	9	9	9	2835.4	4455.3	3108.6	7457.3	6995.4	7648	7255.9	6201.6	6414.9	8602.7	7312.4	6248.5	1153	2174.5	1986.1	980.55	1038.8	2081.5	7134.5	7919.3	6395.6	5107.8	4950.7	5629.7	4378.5	1980.1	3286.4	6832.1	3269.6	5122	5664.5	--	--
Smjp002269	328.12	119.05	327.11	C18H17NO5	[M+H]+	N-[3-(4-Hydroxyphenyl)acryloyl]-L-tyrosine	Amino acids and derivatives	Amino acids and derivatives	77201-66-2	3	2737.2	3023.8	2769.3	2160.8	2171.9	2213.9	1553.3	1638.8	1554.7	1297.1	1068.7	1154.1	867.06	863.18	1426.5	1563.8	1853.6	1504.8	1716.4	1658.9	9	1638.6	2096.2	1104.6	2382.7	1079.9	9	9	9	9	1070.6	1066.9	1571.4	1079.7	--	--
pmn001691	327.22	291.2	328.225	C18H32O5	[M-H]-	9,12,13-Trihydroxy-10,15-octadecadienoic acid	Lipids	Free fatty acids	-	1	8881.9	11199	8585.9	5853.1	6164.9	7159.9	5624.7	5997.4	5820.1	5607	4786.7	5303.1	13739	17771	16101	15244	15586	16865	18341	18894	17399	1288.4	2453	2374	6196.5	5768.2	4145.3	5285.6	4650	3457.4	8337.6	8012.8	7818.4	7409.7	--	--
mws0884	328.05	134.2	329.053	C10H12N5O6P	[M-H]-	Cyclic 3',5'-Adenylic acid	Nucleotides and derivatives	Nucleotides and derivatives	60-92-4	1	9	9	9	9	9	2112.9	50885	53688	55147	67939	90421	77047	128220	156940	138230	4795.7	4441	2148.5	9	3708.3	2832.2	265280	255180	233880	1768300	1646100	1919700	6172400	6643500	6146000	777450	794600	690940	774850	C00575	ko00230,ko01100
Lmqp006559	330.34	312.33	329.327	C20H43NO2	[M+H]+	2-Amino-1,3-eicosanediol	Others	Saccharides and Alcohols	-	3	524230	601970	408460	501420	453460	534970	433130	467180	771900	709550	636790	623160	413500	385260	450200	421550	423050	449050	368380	357820	646380	423870	693060	440730	324290	446940	289230	298490	315840	251670	557900	540980	480720	497170	--	--
Lmtn002565	329.11	167.03	330.095	C14H18O9	[M-H]-	1-O-Vanilloyl-D-Glucose	Organic acids	Organic acids	-	1	2103900	2388000	2120500	1709700	1976200	1686200	805210	710330	651300	600560	573230	514850	681370	748250	618370	833110	823830	839540	746400	660030	702010	340320	325770	366800	199870	236650	192560	31528	32990	30578	808590	811810	787930	776780	C20470	--
Zmhn001883	329.09	209.04	330.095	C14H18O9	[M-H]-	Vanillic acid-4-O-glucoside	Organic acids	Organic acids	32142-31-7	2	8951500	8983200	9232800	6943800	6577700	6876000	4534500	3809700	3453800	4803000	4148100	4128700	3716800	5320800	3812600	5422800	4335200	4205400	5691400	4882500	5199300	4505300	4419100	5267900	4548100	4274300	3174200	2060200	2324400	1980600	5394900	4816900	5439000	5427100	--	--
Lmmn003663	329.09	167.04	330.095	C14H18O9	[M-H]-	5-Glucosyloxy-2-Hydroxybenzoic Acid methyl ester	Organic acids	Organic acids	-	1	2473800	2286200	2357200	1952900	1928300	2078400	792270	738510	666090	719620	569900	506810	691820	871430	718470	1029700	884170	799300	700990	734950	694460	356540	406420	381310	256200	223090	201180	37065	50051	30880	882740	901310	930180	813040	--	--
pmn001517	329.12	167	330.131	C15H22O8	[M-H]-	3,4,5-Trimethoxyphenyl-1-O-Glucoside	Organic acids	Organic acids	-	1	1608700	1671100	1457800	1654300	1925200	1707500	5492000	5553000	5718400	6584500	6547200	6446500	7767600	10948000	7564600	2893900	2770100	2661100	2745100	2846300	2580700	5559700	5044300	5905800	5934900	5192300	5005600	4703200	4892200	4260300	4551000	4012400	3199900	4167100	--	--
pmn001694	329.23	229.15	330.241	C18H34O5	[M-H]-	9,10,13-Trihydroxy-11-Octadecenoic Acid	Lipids	Free fatty acids	29907-57-1	1	29156	34198	30971	25838	27125	28447	32659	33627	36344	38143	38422	34332	76119	102420	76066	31872	30616	32700	31554	32155	29360	18705	20466	18241	30367	28296	29030	27790	25125	22266	33101	29505	28961	32020	C14835	ko00591
pmp001284	331.28	313.27	330.277	C19H38O4	[M+H]+	Monopalmitin	Lipids	Glycerol ester	542-44-9	1	141450	150750	133400	131990	148690	149010	168080	160430	162460	147100	133950	139880	135200	134680	127040	132450	122370	139730	138310	130370	117120	128430	138420	141630	146670	138640	137560	124140	128350	120600	128680	121960	120900	117330	--	--
pme3184	332.08	136	331.068	C10H14N5O6P	[M+H]+	2'-Deoxyadenosine-5'-monophosphate	Nucleotides and derivatives	Nucleotides and derivatives	653-63-4	2	100110	90943	77123	67072	49381	63540	54336	64573	55830	69191	63268	23729	71671	47641	60291	27355	20984	27915	20076	18736	18165	30770	36874	27146	46360	38811	28161	39495	17100	45853	53420	37044	38774	45999	C00360	ko00230,ko01100
pmb0789	332.13	152.07	331.127	C14H21NO8	[M+H]+	Pyridoxine-5'-O-glucoside	Others	Vitamin	-	3	417870	407190	380370	320200	284630	259540	161470	172490	176370	175010	198730	129400	196170	179200	185830	60348	50606	56050	64679	74958	59629	104710	126960	107610	107540	109050	104350	109270	91122	101760	178390	155380	155480	162920	C03996	--
pmc0066	333.05	137.05	332.052	C10H13N4O7P	[M+H]+	2'-Deoxyinosine-5'-monophosphate	Nucleotides and derivatives	Nucleotides and derivatives	3393-18-8	3	110930	103830	97118	127560	165360	148230	587170	672160	609000	751330	836540	812130	618010	533990	525100	2553700	3043500	2926000	1486900	1400000	1476300	869950	1323100	1313700	1402100	1582400	1471700	2370400	2015700	2651800	855330	878000	716250	613260	C06196	ko00230
pmn001518	331.07	169.01	332.074	C13H16O10	[M-H]-	1-O-Galloyl-β-D-glucose	Organic acids	Organic acids	58511-73-2	2	173660	139200	243620	433700	396660	408140	192500	204120	167310	181070	187190	191140	133370	190860	171020	478200	542740	457320	493560	365390	462350	175020	185100	164160	104220	85951	101270	30908	28338	22722	233170	198050	273320	201890	C01158	--
Lmmn001552	331.1	169.05	332.111	C14H20O9	[M-H]-	Leonuriside A	Organic acids	Organic acids	121748-12-7	2	57345	51086	46168	37363	36090	49753	33152	37080	28781	26303	25812	28253	20562	37723	28675	36335	49795	36054	28466	36171	31373	28458	32127	24929	20222	23006	22624	12717	14912	8048.9	34472	36081	38738	24804	--	--
Lmmn001294	331.1	153.02	332.111	C14H20O9	[M-H]-	Koaburaside	Organic acids	Organic acids	41653-73-0	1	36432	43602	45894	59535	54642	59273	99631	94448	90577	109540	93639	114470	95763	123740	99032	61523	46967	51801	40783	38188	40195	63169	71609	74917	81679	83112	70148	59032	61472	50488	70651	67011	69212	71724	--	--
Lmyn007622	331.25	157.12	332.256	C18H36O5	[M-H]-	9,10,18-Trihydroxystearic acid	Lipids	Free fatty acids	496-86-6	1	2026.5	1582.4	2063.7	3660.2	4185.5	3486	1862.7	1024.9	1866.7	1071.2	1916.8	1096.7	1586.1	2442.9	2011.3	2785.8	4105.8	3211.4	3039.5	3329.8	3973.1	5040.5	5111.8	4739.9	6161.7	5279.4	5379.2	5465.3	4773.7	5149.5	3654.1	2925.3	3225.4	3357.8	C19621	ko00073
Lmqn000432	333.06	333.06	334.067	C9H19O11P	[M-H]-	1-(sn-Glycero-3-phospho)-1D-myo-inositol	Others	Saccharides and Alcohols	-	2	715340	427290	532980	248610	166920	199470	9	9	9	9	9	9	9	9	9	458590	484850	394910	384620	464740	483860	1489000	425650	471160	1944200	2568200	2310200	4314300	3220200	2395900	1283600	1616600	1329300	327610	--	--
pmb3074	337.09	191.05	338.1	C16H18O8	[M-H]-	5-O-p-Coumaroylquinic acid	Organic acids	Organic acids	1899-30-5	2	519660	554050	564670	178660	145310	173330	94826	81153	67825	55559	60456	62951	50087	79769	46507	1019300	891280	997520	933510	830580	776160	169410	170310	124650	68126	68422	73389	77431	68069	69593	283650	310380	275280	240590	C12208	ko00940,ko00941,ko00945,ko01110
Zmyn000083	338.99	78.96	339.996	C6H14O12P2	[M-H]-	D-Glucose 1,6-bisphosphate*	Others	Saccharides and Alcohols	10139-18-1	2	35225	24126	34360	124780	110990	89159	140940	117100	131480	116920	99606	105860	118770	109440	105380	12459	5497.2	6730.3	3957.9	8545.5	7036.1	132910	112250	155210	102650	106560	115340	107580	113410	80705	78738	96849	76565	72784	C01231	ko00500,ko01100
pme3311	339	97	339.996	C6H14O12P2	[M-H]-	D-Fructose-1,6-biphosphate*	Others	Saccharides and Alcohols	488-69-7	2	9	14831	8448.1	36184	41108	45436	15379	29414	31904	30675	24269	18836	23573	48463	49906	9	8664.3	9	9	9	9	55313	46827	47708	56299	70698	66137	80949	73749	88229	38492	32046	32866	35264	C00354	ko00400,ko00710,ko01100,ko01110,ko01200
Lmsn002548	341.09	161.02	342.095	C15H18O9	[M-H]-	1-O-Caffeoyl-β-D-glucose	Organic acids	Organic acids	14364-08-0	2	26693	20581	15954	26748	13798	29861	87519	61247	79927	70738	58432	55557	70491	112070	114570	139030	151260	165970	78960	69312	68882	533640	554940	462600	762460	726170	844760	3237000	3131200	3215400	453790	415910	374390	318960	C10433	--
Jmwn002620	341.09	161.02	342.095	C15H18O9	[M-H]-	Vanillic Acid-4-O-Glucuronide	Organic acids	Organic acids	-	2	24032	24507	22625	31123	18487	23209	61095	78165	76619	76342	76387	75864	99700	140480	140960	163560	131320	195240	89197	100240	81106	551290	595270	694680	1064300	697640	1056700	3029400	3492200	3396600	345070	400550	470530	366060	--	--
mws1080	341.11	179	342.116	C12H22O11	[M-H]-	Galactinol*	Others	Saccharides and Alcohols	3687-64-7	1	1298600	2004000	2228100	2386800	4037600	2655600	1171500	1066900	1117400	1356000	2403200	1019400	1151800	1959400	1036700	1087700	1144500	1262700	1031300	1917100	1417200	1742600	1232000	1477700	1206300	1650000	1381300	2341000	1274600	2218200	1835200	2413900	1935100	1899300	C01235	ko00052,ko01100
mws5038	341.11	89.02	342.116	C12H22O11	[M-H]-	Isomaltulose*	Others	Saccharides and Alcohols	13718-94-0	1	1846700	822600	812580	992520	1754000	1745300	1984900	297900	956970	769260	709370	452100	646980	1281000	453570	519700	480230	462130	712950	764690	816500	779260	817700	612230	910490	1197300	470930	522400	1137600	621780	699250	718230	827240	859230	C01742	--
pme0519	341.11	119.03	342.116	C12H22O11	[M-H]-	D-Sucrose*	Others	Saccharides and Alcohols	57-50-1	1	1539300	1689000	1558500	2022500	2373100	2347000	1041200	798620	688120	978730	2923500	539020	868170	1223400	933540	640000	1252100	1857400	1056500	1489100	1411900	1745800	873520	1559700	1164900	938090	844150	1731300	2249900	1343000	1540800	1927000	1820500	1137300	C00089	ko00052,ko00500,ko01100,ko01110,ko02010
Lmsn000381	341.11	89.02	342.116	C12H22O11	[M-H]-	D-Maltose*	Others	Saccharides and Alcohols	133-99-3	1	1019500	776030	1055100	880200	1016100	1069200	1133200	461680	940860	1057600	751260	613170	971850	820010	797780	599810	486700	465600	732670	626780	625810	1895600	1325300	709210	477770	488400	584800	9	538370	591110	1151300	651730	787410	1170300	C01971	--
mws1333	341.11	113	342.116	C12H22O11	[M-H]-	Melibiose*	Others	Saccharides and Alcohols	585-99-9	1	600970	512690	655920	703920	633240	555040	403890	414060	392400	360670	752250	407180	348790	438900	506770	181610	210820	284560	407580	326230	267750	456890	426010	491140	227120	272920	223370	430730	442210	311990	665850	546020	466790	380720	C05402	ko00052,ko01100,ko02010
mws0264	341.11	119	342.116	C12H22O11	[M-H]-	D-Trehalose*	Others	Saccharides and Alcohols	99-20-7	1	570680	543440	472600	811060	916380	1005500	224240	270430	506620	634080	758890	201430	335130	538030	348310	444840	355640	345010	501800	385800	373120	496690	434030	9	261450	546220	9	466790	461650	313030	721650	604520	434950	747510	C01083	ko00500,ko01100,ko01110,ko02010
mws0906	341.12	179	342.131	C16H22O8	[M-H]-	coniferyl alcohol-4-O-glucoside (Coniferin)	Organic acids	Organic acids	531-29-3	2	96772	112770	203000	179000	185020	179890	119540	121800	9	373350	9	419360	181830	702180	9	120240	126820	136370	204900	259080	188880	89239	92528	9	202370	378860	313630	5906400	6164800	5931600	537170	376750	251930	380180	C00761	ko00940
MWS1983	343.12	89.03	344.132	C12H24O11	[M-H]-	Maltitol	Others	Saccharides and Alcohols	585-88-6	3	27900	20900	37880	27855	24106	44534	28289	10120	8189.5	16524	19089	19348	8590.8	44674	8608.2	19820	19899	29190	18240	21094	22238	33794	19320	6461	15079	15445	24986	20012	17902	9	32995	27025	32213	15554	--	--
MWSslk074	343.12	59.01	344.31	C12H24O11	[M-H]-	Lactitol	Others	Saccharides and Alcohols	585-86-4	3	2741700	2252800	2240200	2470900	2226800	2603100	2439800	2070100	2057400	1903300	2182400	1802800	2105400	2825100	3113400	1577400	1536400	1530400	1997400	2010300	1948500	1709400	1330700	1702500	1430300	1452300	1445800	1618500	1655200	1361000	2425500	2402500	2413100	2188100	--	--
pmb0801	346.11	184.1	345.106	C14H19NO9	[M+H]+	4-Pyridoxic acid-O-glucoside	Others	Vitamin	-	1	97438	94191	93504	83135	80802	79331	73713	72749	72345	70791	72686	69503	78899	68937	75481	33258	36882	33577	40658	32035	32717	30549	30642	23378	33471	31769	28427	28823	36576	29819	54181	45455	53136	42437	--	--
Lmtn000940	345.08	139.04	346.09	C14H18O10	[M-H]-	1-O-(3,4-Dihydroxy-5-methoxy-benzoyl)-glucoside	Organic acids	Organic acids	-	2	242610	283050	243480	134330	144780	135130	42653	55759	55372	63512	53573	58765	29686	36491	34236	105900	124830	102460	45113	36359	37694	22990	35177	30365	60860	52875	64429	56472	46858	49568	81107	67632	66370	77908	--	--
pmb0981	348.07	136	347.063	C10H14N5O7P	[M+H]+	Adenosine 5'-monophosphate	Nucleotides and derivatives	Nucleotides and derivatives	61-19-8	3	45400	50612	37050	72764	49738	55415	101890	92480	85301	95023	79045	77123	73627	59166	79430	65653	57099	65278	44731	61946	60588	71540	62713	67870	122360	120220	97775	130540	125010	122680	62923	59957	68004	53018	C00020	ko00230,ko00908,ko01100,ko01110,ko01240
pmb0532	349.05	137.3	348.047	C10H13N4O8P	[M+H]+	Inosine 5'-monophosphate	Nucleotides and derivatives	Nucleotides and derivatives	131-99-7	3	6739.4	7065.1	3499.2	9041.4	1732.8	5401.2	11131	8129.9	9911.7	12222	8976.3	6586.4	8537.1	4747.1	11048	8713.6	5392.7	5307.4	3969.7	10709	7935.3	9596.9	9498.6	8026.7	13917	11988	11056	15298	11747	15518	6007.8	6191.4	8164.6	6332.6	C00130	ko00230,ko01100,ko01110,ko01240
Lmhp011562	353.27	261.22	352.261	C21H36O4	[M+H]+	1-α-Linolenoyl-glycerol*	Lipids	Glycerol ester	-	1	43081	47581	53756	141630	128050	132060	28394	29845	25754	32694	28337	31787	30764	24563	28852	129890	141850	142690	69698	62246	64442	89497	97966	91581	160090	144960	130170	152150	106100	133840	66703	59049	64130	62766	--	--
Lmhp011388	353.27	261.22	352.261	C21H36O4	[M+H]+	2-α-Linolenoyl-glycerol*	Lipids	Glycerol ester	55268-58-1	1	40929	52448	54052	155690	141880	163080	30720	1364.4	29781	31016	29031	34633	35083	29647	30103	132300	151080	149620	75948	64048	65852	122770	143230	109190	199970	203440	205820	168920	187300	169910	83280	79348	76255	79230	--	--
Lmhp112042	355.28	263.24	354.277	C21H38O4	[M+H]+	1-Linoleoylglycerol*	Lipids	Glycerol ester	2277-28-3	1	26990	28935	31903	63658	57213	57881	11736	10287	10891	10606	9176.8	11292	10719	8533.6	8384.3	71280	76894	76361	54725	47918	51529	37444	37116	34358	58578	51913	41680	36040	30764	35896	25061	21080	27278	24524	--	--
Lmhp012042	355.28	263.24	354.277	C21H38O4	[M+H]+	2-Linoleoylglycerol*	Lipids	Glycerol ester	3443-82-1	1	28483	31861	36053	59339	55022	54505	10004	10458	10733	10660	9295.2	10166	9444	7725.6	8625.4	80220	79693	77811	52552	49091	53599	38444	38181	35742	55069	54583	43909	38017	29953	27737	27151	19277	25498	21229	--	--
Lmsn003318	355.1	175.04	356.111	C16H20O9	[M-H]-	1-O-Feruloyl-β-D-glucose	Organic acids	Organic acids	7196-71-6	1	83193	84450	70167	115810	87732	111140	568990	561450	559260	750240	752810	650700	869410	1317100	787560	9592	5793.7	15777	9875.6	12258	11894	930730	1133900	978860	1975000	1423800	1789300	6505400	8845900	7558600	906740	863850	973770	733280	C17759	--
Hmmn002544	355.1	193.05	356.111	C16H20O9	[M-H]-	Ferulic acid-4-O-glucoside	Organic acids	Organic acids	117405-51-3	1	19256	29558	21722	46603	40835	45788	162010	180390	164620	248850	197850	206770	211300	303790	186380	26050	16899	18916	19362	25400	18816	226670	254610	267650	238060	309090	340520	1392600	1686300	1403600	251480	209050	275700	240970	--	--
pmb0296	357.3	265.4	356.293	C21H40O4	[M+H]+	1-Oleoyl-Sn-Glycerol	Lipids	Glycerol ester	129784-87-8	3	16295	14612	16358	5459.5	5619.6	6094.5	17190	19590	18230	10798	13524	11342	33116	28278	33680	14488	13054	12464	18419	13336	15333	11494	12309	10663	286210	272240	281360	252710	288610	277830	73442	71004	68408	64835	--	--
pmb0998	364.07	152.1	363.058	C10H14N5O8P	[M+H]+	Guanosine 5'-monophosphate	Nucleotides and derivatives	Nucleotides and derivatives	85-32-5	3	4643.5	5683.9	5048.8	9815.9	3233.3	10845	8330.1	3578.6	6410	7629.3	13672	2816.5	7753.8	5293.2	8372.1	8203.2	11006	8689.1	9	9	10896	7045	8293.5	5401.4	8587	7447.6	7606.5	20688	5563.9	10957	8094.5	9242.7	6082.6	7780	C00144	ko00230,ko01100
Lmbp002309	371.1	209.05	370.126	C17H22O9	[M+H]+	Sinapaldehyde-4-O-Glucoside	Organic acids	Organic acids	154461-65-1	2	68703	71224	72645	256450	291910	280820	160830	146990	153840	215570	201610	186140	220630	222640	227340	111230	123320	109680	85199	89096	91155	21794	20124	16070	54910	53394	51906	89637	79513	84767	130960	123260	122180	120040	--	--
pmn001695	371.1	249.06	372.106	C16H20O10	[M-H]-	Trihydroxycinnamoylquinic acid	Organic acids	Organic acids	-	1	253460	279630	271360	120480	121090	116400	949600	930730	898300	1305700	1332500	1236700	1704700	2976400	1747600	184970	187480	193670	212860	203990	195400	88378	90371	95853	113700	142270	115120	135450	132020	111240	540410	441790	393340	424040	--	--
mws0232	377.15	243.09	376.138	C17H20N4O6	[M+H]+	Riboflavin (Vitamin B2)	Others	Vitamin	83-88-5	1	74385	74782	78502	72355	66014	71337	65658	53626	57653	58558	55297	54727	65017	61259	53029	106110	99530	103470	83235	101590	103840	55957	51785	54221	63134	69928	67876	87308	95005	79011	68524	72361	68888	75977	C00255	ko00740,ko01100,ko01110,ko01240,ko02010
pme3337	384.12	252	383.108	C14H17N5O8	[M+H]+	Succinyladenosine	Nucleotides and derivatives	Nucleotides and derivatives	4542-23-8	1	1510100	1531300	1333900	2093900	1884100	2013100	1389400	1146400	1136200	1336400	1028300	1088000	1185200	1188100	1111800	1174400	1073800	1114400	1016700	982460	908620	1227800	1282800	1126900	990300	977050	1002100	999340	840140	856530	1222800	1228400	1067400	1094200	--	--
HJN003	385.11	223.06	386.122	C17H22O10	[M-H]-	1-O-Sinapoyl-D-glucose	Organic acids	Organic acids	-	2	104600	110120	125530	71042	52067	59260	166460	207520	221320	231260	220710	224380	149600	282990	168370	140270	122710	148820	98433	86497	66106	86945	79223	70501	190740	168170	136780	180440	202880	159500	108990	116140	112870	110060	C01175	ko00940
Lmzn001582	387.17	207.1	388.174	C18H28O9	[M-H]-	5'-Glucosyloxyjasmanic acid	Organic acids	Organic acids	-	1	17377	19662	19743	8188.9	8605.2	11803	12280	15497	15938	12776	13228	11746	12904	16862	11147	7990	9993.8	10346	14658	9360	14336	6955.6	5597.7	5385.2	5942.3	7236.6	6784.7	8488.9	8834.1	9273.7	8288.6	12752	9445.6	7743.2	--	--
pmc0281	400.15	136.11	399.139	C15H21N5O8	[M+H]+	Ribosyladenosine	Nucleotides and derivatives	Nucleotides and derivatives	-	3	67672	66815	72235	59084	61652	53833	57629	52231	57922	51964	53788	56627	58537	49865	46286	62346	68727	56659	55835	46752	64583	41664	45111	43565	53606	47375	56366	39454	48789	49078	47838	45127	49696	49284	--	--
Hmln003529	401.15	269.11	402.152	C18H26O10	[M-H]-	Benzyl β-primeveroside	Organic acids	Organic acids	130622-31-0	1	13494	18706	14824	10261	7060.1	9189.4	41099	50812	37853	53776	43730	53748	73448	64976	54643	6938.1	11183	6189.7	3258.5	6478.7	7701.7	5927.4	1172.1	9	9	9	9	9	9	9	19648	12741	15973	14230	--	--
Cmjn004337	401.14	269.1	402.153	C18H26O10	[M-H]-	Benzyl-(2''-O-xylosyl)glucoside	Organic acids	Organic acids	-	2	1613.6	9	9	9	3142.7	9	15402	22077	26735	26714	31262	35581	46570	115230	68628	9	9	1470.5	9	9	9	9	2023	2264.6	9	9	9	9	9	9	9173.3	7862.2	9485.8	6659.6	--	--
pme3007	402.99	159	404.002	C9H14N2O12P2	[M-H]-	Uridine 5'-diphosphate	Nucleotides and derivatives	Nucleotides and derivatives	58-98-0	3	16029	12400	13349	21139	21730	27581	35217	31331	34042	28364	39977	26486	25512	23115	27013	21804	26089	9687.8	14919	10505	11165	59697	53101	43823	40119	50312	43972	61060	64088	48460	21138	29813	22842	32645	C00015	ko00240,ko00908,ko01100,ko01240
pmb2165	412.25	184.07	411.239	C18H38NO7P	[M+H]+	LysoPC 10:0	Lipids	LPC	22248-63-1	3	9	9	9	9	9	9	3180.2	2850	2771.4	5077.7	5053.1	4878.9	2746.5	2500.6	2897.3	9	9	9	9	9	9	1954.4	2314.3	1656.4	51734	54935	61879	36196	41432	40048	10982	10303	11312	9844	--	--
mws2523	421.08	241.1	422.083	C12H23O14P	[M-H]-	Trehalose 6-phosphate	Others	Saccharides and Alcohols	4484-88-2	2	25318	43970	38277	51598	58055	66913	171800	177760	176990	164370	155320	164610	173310	268790	181470	66804	71205	70153	65036	64252	77714	83010	75337	77103	178000	150510	144160	206730	230940	208490	95578	113340	107620	91469	C00689	ko00500,ko01100,ko01110
mws1089	421.1	241	422.083	C12H23O14P	[M-H]-	Sucrose-6-phosphate	Others	Saccharides and Alcohols	-	3	19284	25127	19115	39172	30577	37338	9	18187	9	44190	9	9	57065	9	27912	49440	55410	46038	62040	78387	50444	112650	67908	108720	227350	300550	299160	416070	298650	278700	170610	206210	205620	137990	--	--
Lmhp008337	426.26	285.24	425.254	C19H40NO7P	[M+H]+	LysoPE 14:0(2n isomer)*	Lipids	LPE	-	1	1184.7	1383.9	776.24	1826.9	1170.6	1289	3665.1	4225.6	3175.5	3645.8	3869.5	5977	4611	4349.9	5573.8	1496.5	1534.1	1738.3	1776.7	2155.4	1239.6	3873.6	3547.5	3375.4	120790	128110	151170	287790	324950	301660	47479	47642	46344	45131	--	--
pmb0864	426.26	285.24	425.254	C19H40NO7P	[M+H]+	LysoPE 14:0*	Lipids	LPE	-	1	17053	20709	19189	22151	20553	21927	61032	59643	61354	72469	70197	76801	87009	86035	81155	6750	6176.7	7607	10385	10526	8997.5	66468	70938	67840	174370	152500	161170	150890	139770	133490	67206	63502	62353	61610	--	--
pme2117	426	159	427.029	C10H15N5O10P2	[M-H]-	Adenosine 5'-diphosphate	Nucleotides and derivatives	Nucleotides and derivatives	58-64-0	3	12080	23788	21252	45110	43540	43961	74091	85916	100570	77257	71965	73389	80737	35718	52883	22694	17734	16013	12052	19428	19827	174710	145930	114520	199730	164890	176160	179310	217460	253960	45265	52970	75984	90582	C00008	ko00190,ko00195,ko00230,ko00908,ko01100,ko01110,ko01240
Lmyn003028	431.16	269.1	432.163	C19H28O11	[M-H]-	Benzyl-β-gentiobioside	Organic acids	Organic acids	56775-64-5	1	16691	16811	11326	13471	11005	15697	232210	266610	185990	295330	293420	282100	256120	534830	279600	11011	9329.1	8487.8	9543.5	8334.6	9682	19183	24633	20708	23632	14686	21626	17319	12382	17053	77770	65611	62777	53664	--	--
Lmtn002324	431.15	269.1	432.163	C19H28O11	[M-H]-	Benzyl-(2''-O-glucosyl)glucoside	Organic acids	Organic acids	-	1	17368	30600	24915	11665	13593	20291	274840	264460	275980	243110	337930	473640	467490	908670	405020	10305	14262	8722.8	23445	12115	13926	23920	33215	31222	20588	26540	16264	17435	22903	18689	78712	62952	80000	66464	C17564	--
Lmhp008273	438.26	297.24	437.254	C20H40NO7P	[M+H]+	LysoPE 15:1(2n isomer)*	Lipids	LPE	-	3	9	9	9	9	9	9	10877	9925.8	11822	7965.7	8137.3	8465.1	29289	25821	28853	9	9	9	9	9	9	1786.8	2150.7	1792.2	60788	61440	75866	130920	142350	135260	26991	25625	25104	22986	--	--
Lmhp008440	438.26	297.24	437.254	C20H40NO7P	[M+H]+	LysoPE 15:1*	Lipids	LPE	-	3	9	9	1509.8	2237.3	2225.3	1525.1	4205.3	2803.9	3724.8	1671	2525.8	4061	6701.9	5252.5	6399.5	9	9	9	9	9	9	5245	5144.2	4119.8	26415	26018	24134	46909	51866	43976	8969.7	9854.8	10792	8802.6	--	--
pmb0862	440.28	184.07	439.27	C20H42NO7P	[M+H]+	LysoPC 12:0	Lipids	LPC	20559-18-6	3	10471	9314.7	12360	6181	7019.3	7878.3	228110	225970	238230	279930	272740	278000	288010	286840	283800	8752.9	9070.7	9632.7	6367.2	6580	6678.4	278980	300280	287300	827200	830620	865640	798000	850850	761120	277750	314350	278790	299710	--	--
Lmhp008885	440.28	299.26	439.27	C20H42NO7P	[M+H]+	LysoPE 15:0(2n isomer)*	Lipids	LPE	-	1	2063.9	1600.9	2515.8	1371.2	1390.1	1539.1	1220.9	1061.7	722.38	1562.1	1539.3	1423.6	1118.7	1163.1	1058.2	4300.9	3570.4	4473.5	4221.1	6070.8	3806.8	1243.5	1307.8	1139	8019.5	5982.6	6806.6	7966.8	10658	9816	2380.6	2853.6	2904.6	2688.1	--	--
Lmhp009187	440.28	299.26	439.27	C20H42NO7P	[M+H]+	LysoPE 15:0*	Lipids	LPE	-	1	61680	58793	59309	39724	42688	43360	15800	13105	15239	17147	12803	13955	17833	15757	18461	17177	20363	17450	23162	28541	21056	29225	30204	28701	47180	47198	45115	16592	19905	14575	27631	28892	27884	26657	--	--
pme1014	445.3	341.3	444.303	C31H40O2	[M+H]+	Menatetrenone (Vitamin K2)	Others	Vitamin	11032-49-8	3	69731	66108	64348	139420	149630	145740	54893	45331	42033	50685	43925	46356	47318	40959	41182	200020	175860	225000	245000	216040	186470	55855	62416	65924	45004	35733	36861	19297	15892	23341	132440	99576	118980	112090	--	--
pmb1283	448.1	163.5	447.215	C18H33N5O6S	[M+H]+	L-Glutaminyl-L-valyl-L-valyl-L-cysteine	Amino acids and derivatives	Amino acids and derivatives	-	3	14464	15069	17355	18379	22184	18767	12427	13368	13732	17350	20401	18656	15686	15201	14515	22519	15131	18408	16448	13142	16526	25271	27295	23836	25561	24815	28342	13462	9179.2	9844.2	19113	18872	13865	17861	--	--
Lmhp007836	448.25	307.23	447.239	C21H38NO7P	[M+H]+	LysoPE 16:3	Lipids	LPE	-	3	9	9	9	9	9	9	757.54	551.3	9	9	9	599.71	1203.8	928.13	1129.2	9	9	9	9	9	9	9	9	9	12903	12356	14995	42851	51740	48415	6764.7	6306.6	4620	5584.6	--	--
MWSmce674	451.36	89.06	450.7	C31H46O2	[M+H]+	Vitamin K1	Others	Vitamin	84-80-0	3	6987.2	4817.9	6216.1	6492.2	5852.3	5778.1	6964.5	5953.4	8237	6713.2	7102.5	7119.2	5369.3	6605.3	5165.1	5123.9	5661.3	5507.4	5803.2	4586.1	5183.4	6696.9	5703.6	6099.6	4783.5	6244.9	6075.3	6813.7	6061.1	7298.2	6085.5	5488.7	6715.9	6316.9	--	--
Lmhp008763	452.28	311.26	451.27	C21H42NO7P	[M+H]+	LysoPE 16:1(2n isomer)*	Lipids	LPE	-	1	9	9	9	7850.1	9763.8	10129	170980	172970	162860	117860	118100	133020	265100	218530	262010	9	9	9	9	9	407.48	48863	56684	49917	1039800	1078900	1282800	2582000	2849800	2774000	721620	666080	681620	662190	--	--
Lmhp009034	452.28	311.26	451.27	C21H42NO7P	[M+H]+	LysoPE 16:1*	Lipids	LPE	-	1	9	9	9	9212.4	7910.7	8016.1	152470	146170	151230	116220	109910	115260	254280	215630	258150	9	9	9	9	9	9	45003	55820	50005	976210	1024600	1280000	2619800	2635200	2732500	647750	636740	590640	624630	--	--
pmb0876	454.29	313.27	453.286	C21H44NO7P	[M+H]+	LysoPE 16:0*	Lipids	LPE	53862-35-4	1	1988100	1756700	1758100	1201400	1169100	1290400	800410	818930	845020	925840	845990	867320	853030	773650	794800	962570	926850	856180	938320	1025300	918670	1239500	1317700	1247800	2892600	2675000	2644500	1532800	1578900	1395800	1385800	1310000	1260700	1298900	--	--
pmd0160	454.29	313.27	453.286	C21H44NO7P	[M+H]+	LysoPE 16:0(2n isomer)*	Lipids	LPE	-	1	2045400	1742200	1720900	1181600	1168300	1293200	800180	815860	848900	904270	855760	853770	838100	807840	855710	944220	858210	882240	922830	966070	904670	1236000	1346300	1238700	2901900	2671200	2722600	1506500	1473600	1403800	1362900	1359800	1301400	1298900	--	--
MWS5083	455.1	96.97	456.105	C17H21N4O9P	[M-H]-	Flavin Single Nucleotide(FMN)	Nucleotides and derivatives	Nucleotides and derivatives	6184-17-4	2	25214	36180	36052	29836	30007	22503	54212	51097	41884	42026	55011	47511	59374	73400	42270	27877	22773	28899	31183	30223	27691	24361	21155	15741	21913	20799	28490	63611	60699	64342	41252	37967	29606	29744	C00061	ko00190,ko00740,ko01100,ko01110,ko01240
pmb0464	458.1	116.3	457.143	C16H27NO14	[M+H]+	L-Aspartic acid-O-diglucoside	Amino acids and derivatives	Amino acids and derivatives	-	3	56611	55302	42969	497000	655970	712800	66691000	63966000	59138000	50489000	50777000	103560000	65528000	71616000	59248000	147800	136750	94975	215620	166630	193030	9906300	9023700	9096500	62028000	65404000	64035000	78338000	133690000	97515000	32403000	28992000	27837000	29214000	--	--
Lmhp009464	466.29	325.27	465.286	C22H44NO7P	[M+H]+	LysoPE 17:1(2n isomer)	Lipids	LPE	-	1	15301	14189	14132	15007	15120	15001	51203	48451	54165	37742	37785	41437	89083	78779	94572	7412.6	5934.9	5010.7	5539.3	5103.8	4425.2	30011	31935	28481	637760	588220	728760	1147900	1355600	1278900	225510	217180	225210	219950	--	--
pmd0130	468.31	184.07	467.301	C22H46NO7P	[M+H]+	LysoPC 14:0	Lipids	LPC	20559-16-4	1	85133	85127	78671	80849	77904	81930	285980	267930	275150	364770	346230	381420	377070	376300	343230	28527	27348	26485	29223	30019	24896	249610	300780	270730	658450	628550	649580	580870	554060	505700	246360	249100	225700	241090	--	--
Lmhp008233	474.26	333.24	473.254	C23H40NO7P	[M+H]+	LysoPE 18:4	Lipids	LPE	-	2	9	9	9	9	9	9	9	9	1107.5	824.39	725.14	1173.6	1486.7	1361.5	1649.9	1650.7	9	9	9	9	9	864.17	1181.1	1201.4	10200	10850	13571	11700	12248	14453	2470.7	3468	3190.7	2934.4	--	--
Lmhp008801	476.28	335.26	475.27	C23H42NO7P	[M+H]+	LysoPE 18:3*	Lipids	LPE	-	1	874120	914550	964870	798120	739650	726600	648250	716950	710920	514670	558140	577310	1063800	910110	1170500	290720	271700	304930	410230	433020	364090	626280	658060	661200	8001600	7298900	10208000	15633000	17881000	15699000	3558600	3713200	3431100	3345800	--	--
Lmhp008589	476.28	335.26	475.27	C23H42NO7P	[M+H]+	LysoPE 18:3(2n isomer)*	Lipids	LPE	-	1	889690	886100	921630	780110	713660	805740	673320	730730	760880	571300	556980	610220	1147800	950110	1033700	296110	303530	290240	400230	394690	351540	593480	708770	628790	8567600	7721900	9467700	16045000	17231000	16637000	3707300	3525700	3463900	3293800	--	--
pmb0874	478.29	337.27	477.286	C23H44NO7P	[M+H]+	LysoPE 18:2(2n isomer)*	Lipids	LPE	-	1	4310300	4313400	4139900	3879900	3746600	3941400	2260900	2344600	2504700	1888400	1914100	1976500	3505600	2912700	3488100	1863600	1717500	1611400	2182500	2271400	2044600	2608400	3058400	2638900	29768000	28421000	32244000	40077000	41142000	40872000	14749000	13914000	13824000	14148000	--	--
pmb0881	478.29	337.27	477.286	C23H44NO7P	[M+H]+	LysoPE 18:2*	Lipids	LPE	-	1	863910	891160	785150	607020	444910	554120	136790	145500	124660	129630	107910	94993	134170	95267	163900	563460	562350	552560	619370	621930	595820	235170	272410	192900	864610	1444800	2027600	2836000	3185400	1145700	228920	240310	294810	557880	--	--
Lmsn004162	477.1	169.01	478.111	C22H22O12	[M-H]-	1-O-Galloyl-2-O-p-Coumaroyl-β-D-glucose	Organic acids	Organic acids	94356-18-0	1	7261.7	5354.3	9392.3	5652.1	5945.2	4791.4	9	9	9	1734.9	9	9	2181.1	9	2695.9	23151	20315	22039	16570	17977	24558	16668	19154	17900	8564.5	6373.6	6956.8	3769.2	4000	9	8702.3	8713.3	10582	7256.8	--	--
mws0289	480.31	339.29	479.301	C23H46NO7P	[M+H]+	LysoPE 18:1*	Lipids	LPE	89576-29-4	1	602680	571950	565210	717680	679750	738120	401680	353940	373970	392170	385760	376290	449110	488840	443300	351150	321720	341300	361750	429910	372470	634750	683790	601650	909670	904080	9	9	9	9	416870	432450	419570	391340	--	--
pmb0856	480.31	339.29	479.301	C23H46NO7P	[M+H]+	LysoPE 18:1(2n isomer)*	Lipids	LPE	-	1	1710700	1716400	1619400	1639600	1535200	1678100	2743000	2766600	2990800	2108500	2170500	2228800	3955700	3481000	3895600	429770	380470	383250	464850	493940	440690	1406000	1644500	1440700	15238000	15869000	18382000	23601000	27295000	26602000	6839800	6709400	6376500	6320700	--	--
pmb0880	482.32	341.31	481.317	C23H48NO7P	[M+H]+	LysoPE 18:0(2n isomer)*	Lipids	LPE	-	3	18020	15468	15331	18078	16186	18724	26663	27188	30512	22270	22016	25146	44498	33245	40988	4458.7	3859.9	3251.5	3828.7	3122.1	4893.6	14758	16420	16887	169590	170750	197050	275110	319020	302220	63389	71305	64012	63128	--	--
pmb2319	482.32	184.07	481.317	C23H48NO7P	[M+H]+	LysoPC 15:0*	Lipids	LPC	108273-89-8	1	191910	177080	183310	150590	143430	143880	42856	41833	43326	49730	41193	46583	55896	51596	59851	48333	50603	46928	51055	54970	50555	47106	52184	44180	92401	86517	90517	47910	47810	48707	72645	67001	71265	74720	--	--
Lmhp009129	482.32	184.07	481.317	C23H48NO7P	[M+H]+	LysoPC 15:0(2n isomer)*	Lipids	LPC	-	1	16459	12886	11777	25882	25047	26529	10614	10267	10137	16844	13650	15880	12593	8307	13688	9827.1	10478	10223	9909.3	11536	9493.3	8367	10861	9212.2	105380	101740	131930	176550	201170	177190	32107	36266	39742	37979	--	--
pmb0883	482.32	341.31	481.317	C23H48NO7P	[M+H]+	LysoPE 18:0*	Lipids	LPE	69747-55-3	3	81762	70382	72354	48042	47095	50984	32845	34208	39837	33398	34609	36112	32634	33663	35254	25092	24233	23198	25225	30943	26364	36612	41887	34406	106850	94498	98822	67279	71492	67503	53699	53373	51638	48879	--	--
Lmmn000214	487.17	341.11	488.174	C18H32O15	[M-H]-	Solatriose	Others	Saccharides and Alcohols	528-40-5	3	28296	51956	29895	70339	99833	91908	40531	53236	17832	21420	48752	18580	11054	57437	15904	79659	65148	78430	125330	108600	96338	100690	52173	52615	65543	60102	48360	160230	36962	21357	22811	48156	52731	28441	--	--
pma1303	492.31	184.07	491.301	C24H46NO7P	[M+H]+	LysoPC 16:2*	Lipids	LPC	-	1	9	9	9	41933	41377	39201	236040	232670	228760	186190	184450	182800	306350	284020	305540	9	9	9	9	9	9	105340	113580	99461	1600400	1546600	1914000	4041800	4446000	4357700	690720	732680	673140	684090	--	--
pmb0863	492.31	184.07	491.301	C24H46NO7P	[M+H]+	LysoPC 16:2(2n isomer)*	Lipids	LPC	-	1	9	9	9	35256	35741	35552	216050	206950	228580	177980	169210	190910	302630	256810	299480	9	9	9	9	9	9	104600	111790	92858	1521800	1567800	1847500	3885300	4404000	4347900	683650	658250	638630	625690	--	--
pmp001270	494.32	184.07	493.317	C24H48NO7P	[M+H]+	LysoPC 16:1*	Lipids	LPC	76790-27-7	1	7665.6	7954.4	6761.5	116430	109080	109910	788000	794510	846120	663790	687550	689460	1150800	1024200	1202300	8264	6219.4	8390.5	6797	5697.5	4185.3	302370	329910	307520	4588500	3949700	5004500	8638700	10084000	9726200	2214700	2313100	2190300	2147400	--	--
Lmhp008833	494.32	184.07	493.317	C24H48NO7P	[M+H]+	LysoPC 16:1(2n isomer)*	Lipids	LPC	-	1	7115.5	7545.5	6422.4	109630	114270	101570	792540	811210	834640	696400	721440	674600	1169500	1059300	1203200	7469.3	6663.3	6600.8	6311.1	5373.5	4597.5	294800	333350	305040	4429200	4346500	5333600	8849900	9202600	9407200	2212900	2209400	2270100	2173900	--	--
pmd0132	496.34	184.07	495.332	C24H50NO7P	[M+H]+	LysoPC 16:0(2n isomer)*	Lipids	LPC	-	1	6794400	6466000	5889800	4351600	4322600	4721800	3044800	3106800	3146100	3383200	3105800	3106400	3230200	3249900	3413400	3145200	3094900	2921700	2878600	3045500	2876200	2491800	2702900	2562300	5474000	5100200	5383100	3942500	3981100	3808000	3792800	3738500	3816900	3955600	--	--
pmb0855	496.34	184.07	495.332	C24H50NO7P	[M+H]+	LysoPC 16:0*	Lipids	LPC	17364-16-8	1	6626900	6354700	6225700	4336500	4264800	4734600	3021100	3044000	3005500	3291000	3131000	3195700	3301600	3215400	3436400	3139000	3001200	3050200	2925900	2940600	2951200	2361300	2606500	2485200	5677700	5452700	5303600	4075400	4147800	3764700	3649200	3911700	3771200	3940000	--	--
pmb3061	499.15	163.1	500.153	C22H28O13	[M-H]-	5-O-p-Coumaroylquinic acid O-glucoside	Organic acids	Organic acids	-	2	274020	257930	259440	165180	114740	176970	113290	114700	116000	76966	78904	72543	89801	70531	71203	80152	79522	78415	82702	61697	68595	41502	35705	38715	36865	25413	20606	19990	18581	17574	68569	75673	67667	73900	--	--
HJAP171	501.33	114.13	500.336	C28H44N4O4	[M+H]+	Frangulanine	Organic acids	Organic acids	25350-22-5	2	3121300	3014400	3435000	3990700	4110400	3968100	2943200	3249400	2942600	3275700	3186600	2786200	2310000	2206200	2237300	2259400	2286000	2158300	2168800	2119600	2297000	2966400	2851400	2894300	1868600	1799900	1875000	880360	929170	803410	2282500	2170300	2265500	2268200	C10003	--
mad2394	501.1	337.05	502.111	C24H22O12	[M-H]-	Sinapoyl-p-coumaroyltartaric acid	Organic acids	Organic acids	-	2	9	9	9	9	9	9	9	9	9	2526.8	9	9	4950.3	5760.8	2958.6	9908.4	7936.1	6714.5	4226.3	4558	4551.5	7267.6	12331	10787	61810	56573	52670	78844	59822	63497	15718	12795	12022	10579	--	--
Lmhp009802	504.31	363.29	503.301	C25H46NO7P	[M+H]+	LysoPE 20:3(2n isomer)	Lipids	LPE	-	3	2814.1	3625.9	5359.7	3771	2302.6	2376.7	5945.4	4306.3	4825.1	3204.1	4735.5	3575.1	6668.9	4860	6873.5	2341.4	1818.3	2406.7	3601	3231.1	3716.1	3382.6	3141.3	4353.3	33620	29473	38469	37182	41568	43603	12012	8812.2	10254	10079	--	--
Lmsn002288	503.14	341.09	504.148	C21H28O14	[M-H]-	1-O-Caffeoyl-(6-O-glucosyl)-β-D-glucose	Organic acids	Organic acids	-	1	29519	37394	27836	53149	30252	83012	337830	363000	371150	248280	284980	258390	761940	712980	678040	209890	218290	209810	185310	188730	170020	480050	401180	384450	1453800	1404700	1496600	11346000	13599000	12585000	1148500	1151500	1094700	1199800	--	--
Lmhp010514	506.32	365.31	505.317	C25H48NO7P	[M+H]+	LysoPE 20:2(2n isomer)	Lipids	LPE	-	1	5795.5	6631.2	3816.9	5685.6	4798.2	5419.4	16004	18435	16896	16509	15862	16456	32498	26483	27289	3084.9	2666.8	2521.5	3022.1	3081.9	2701.2	20313	23969	20429	228040	240030	307740	537200	681950	651670	104460	100750	101920	93390	--	--
Lmhp008718	506.32	184.07	505.317	C25H48NO7P	[M+H]+	LysoPC 17:2	Lipids	LPC	-	1	17821	19521	17476	24436	18773	24160	6704.8	6942.6	5191.9	3691.2	5835.7	4458.6	8398.5	6210.7	6209.3	10939	11772	8406.3	9891.7	12665	9324.9	7508.5	9211.7	4698	123100	124170	147980	173140	185190	176840	39020	36004	29579	36898	--	--
MWSmce668	505.99	158.93	507.18	C10H16N5O13P3	[M-H]-	ATP	Nucleotides and derivatives	Nucleotides and derivatives	56-65-5	1	9	23447	31486	68817	82743	47732	550790	403320	451010	263550	267170	502040	280720	97699	285620	17014	6041.9	10145	8042.1	7272.4	9	303520	434150	315730	495390	428320	397640	565080	514920	618560	158130	174600	158350	170020	--	--
Lmhp009590	508.34	184.07	507.332	C25H50NO7P	[M+H]+	LysoPC 17:1	Lipids	LPC	-	1	79759	78749	79373	108980	93172	103630	122870	128160	134480	95294	96768	98510	211170	182680	217760	28757	29058	23755	27920	23104	23403	66343	69185	55855	1023300	990880	1172600	1325200	1447100	1355500	313120	310330	320670	314200	--	--
pmb2406	510.36	184.07	509.348	C25H52NO7P	[M+H]+	LysoPC 17:0*	Lipids	LPC	50930-23-9	1	201540	191940	174190	150780	149740	162800	116510	120070	128640	107060	96069	95442	144880	154420	160000	73304	67554	71399	68900	61343	66527	97394	91676	91175	266980	250070	270170	216640	225610	193640	138210	138170	126160	140610	--	--
Lmhp010515	510.36	184.07	509.348	C25H52NO7P	[M+H]+	LysoPC 17:0(2n isomer)*	Lipids	LPC	-	1	5568.8	5104.4	5829.2	5292.3	3840.4	4774.7	5152.2	3872.1	4295	6375.5	4798.9	5799	4740.1	3515	4956.7	9570.9	9604.9	9665.5	5645.4	7867.2	8660.3	2941.4	3019.3	4406.3	43968	45400	56909	61541	65015	66725	12839	11735	11779	12767	--	--
Lmhp009526	515.32	261.22	514.314	C27H46O9	[M+H]+	2-α-Linolenoyl-glycerol-1-O-glucoside*	Lipids	Glycerol ester	-	2	7113.5	6172.2	7249.1	1630	1672.6	947.52	6541	3946.4	6483.8	3373.8	2794.3	3436.7	11912	7074.8	11206	5639.7	10112	7272.3	14637	8570.3	11614	5145.8	5419.2	5301.6	160630	150750	182010	164310	142260	183060	39954	43454	37148	40847	--	--
Lmhp009773	515.32	261.22	514.314	C27H46O9	[M+H]+	1-α-Linolenoyl-glycerol-3-O-glucoside*	Lipids	Glycerol ester	-	1	6628.7	6445.7	4502.4	1099.7	1716.1	2444.3	3821.5	6240.3	4415.8	3587.1	3153.8	2421.9	9356.6	6185.1	10688	12074	10805	12016	10337	12665	9442.6	5095.3	6420.1	6530.8	161690	151320	176690	176030	155370	169060	43462	34361	30412	39619	--	--
Hmqp006235	516.3	184.07	515.297	C26H46NO7P	[M+H]+	LysoPC 18:4	Lipids	LPC	-	2	9	9	9	9	9	9	9	9	1855.2	936.09	1257.8	1296.2	772.99	1524	1250.4	9	9	9	9	9	9	1834.4	2405.2	1960.7	14116	15643	16155	11203	13994	11547	3460.9	3137.9	3750.4	3569.1	--	--
Li512115	515.12	353.09	516.127	C25H24O12	[M-H]-	Isochlorogenic acid B	Organic acids	Organic acids	14534-61-3	3	27070	33625	26617	5299.3	9	9	9014.6	7384.4	11163	10409	13592	12772	6839.5	14901	8342.6	6182.6	5967.7	5691.1	9	9	6020.5	5261.4	6394.8	3687.7	9	9	9	9827.8	5859.4	7911.3	9411.8	13611	8348	7787.4	C10468	--
MWSmce328	517.13	163.04	516.45	C25H24O12	[M+H]+	4,5-Dicaffeoylquinic acid	Organic acids	Organic acids	57378-72-0	3	35522	48487	45221	74107	56315	64612	63737	68882	50730	66298	40779	60440	46087	38607	41425	15254	20840	16047	7804.5	8705.1	8621.2	9146.2	10482	12388	20440	15804	19509	17498	15004	17235	25511	27463	28430	24667	--	--
MWSmce346	517.13	163.04	516.45	C25H24O12	[M+H]+	1,3-Dicaffeoylquinic acid	Organic acids	Organic acids	19870-46-3	3	41244	50391	44217	59302	50687	64410	62319	58968	58169	57959	53537	54518	46075	52517	40659	15023	14156	17541	12212	7545	9416.9	8903.5	9993	11799	15804	19231	16905	17439	9573.5	12393	32421	26066	30110	27937	C10445	--
pmb0865	518.32	184.07	517.317	C26H48NO7P	[M+H]+	LysoPC 18:3(2n isomer)*	Lipids	LPC	-	1	746190	778760	746510	525680	486640	517070	149560	148270	153100	137280	140130	139740	163470	171370	175300	656250	678740	713580	694470	661810	644860	200970	201520	197380	272520	212550	272230	189030	178850	154800	266430	285100	287510	258220	--	--
pmb0854	518.32	184.07	517.317	C26H48NO7P	[M+H]+	LysoPC 18:3*	Lipids	LPC	-	1	750350	804080	755420	550950	490480	478570	142010	137820	140400	141530	146110	133150	166880	167680	167040	652950	673930	633400	630990	692290	644350	203180	192380	202280	270550	275120	291460	231740	241170	159390	269760	265010	282550	249400	--	--
Hmbn002692	517.16	175.04	518.164	C22H30O14	[M-H]-	6'-O-Feruloyl-D-sucrose	Organic acids	Organic acids	118230-77-6	2	132180	115550	137320	41480	29498	25371	33643	30158	29054	17002	36095	35114	24160	48442	65658	31713	40965	45348	46243	50196	47550	36535	28535	29858	152210	163140	141410	1070200	783640	1116100	94145	74893	85962	69834	--	--
pmp001273	520.34	184.07	519.332	C26H50NO7P	[M+H]+	LysoPC 18:2*	Lipids	LPC	-	1	3039000	3104900	2853200	1758100	1750900	1847400	544000	593770	570570	507810	544800	507440	616600	651030	614170	2463300	2420800	2473000	2610500	2563200	2438800	471260	498610	457110	1305100	1143500	1190300	843840	1069400	1041800	1102800	1077600	1012700	1031700	--	--
pmp001251	520.34	184.07	519.332	C26H50NO7P	[M+H]+	LysoPC 18:2(2n isomer)*	Lipids	LPC	-	1	13147000	12898000	12930000	11800000	11035000	11310000	2741700	2916000	2966900	2487100	2405900	2734800	3561700	3399400	3420500	5601900	5127400	5129500	6305800	6427700	5747300	3229900	3136500	3121500	31779000	31627000	35301000	41159000	42932000	41723000	14380000	14352000	13671000	14144000	--	--
Lmhp010190	522.36	184.07	521.348	C26H52NO7P	[M+H]+	LysoPC 18:1(2n isomer)*	Lipids	LPC	-	1	10793000	10575000	9958900	10037000	9339000	9830800	7118900	7346100	7576900	6239600	6335300	6753200	9881600	8594400	9794400	2446400	2274100	2271600	2611600	2588700	2365500	3483100	3773400	3332400	27498000	28027000	33533000	45182000	50228000	48731000	13110000	13657000	13435000	13075000	--	--
pmp001281	522.36	184.07	521.348	C26H52NO7P	[M+H]+	LysoPC 18:1*	Lipids	LPC	-	1	2984800	3095100	3070000	4102100	3994700	4180400	2719200	2608400	2692300	2579300	2576100	2556400	3534300	3253200	3449000	2135500	2259500	2025100	1936300	2243000	2038400	2322900	2584400	2392000	2917500	2826600	2878600	2288900	2379000	1817800	2345600	2345300	2367000	2224500	--	--
pmn001710	521.13	359.08	522.137	C24H26O13	[M-H]-	Rosmarinic acid-3'-O-glucoside	Organic acids	Organic acids	910028-78-3	3	77042	69827	49702	36205	33796	32408	33650	46949	38077	35078	31478	36137	39254	46045	24717	18709	15605	18849	19854	17587	22266	17236	18208	13772	11345	18558	13638	28917	22583	21265	32125	18003	30436	26835	--	--
mws0126	524.37	184.07	523.364	C26H54NO7P	[M+H]+	LysoPC 18:0*	Lipids	LPC	19420-57-6	1	967400	906140	825120	493200	498230	508470	463330	490570	519070	442770	398420	405330	606240	536520	597520	361790	354130	356760	337810	343230	357340	343060	395500	368470	1478500	1255800	1319300	1025600	988800	874160	669940	687160	687280	628500	--	--
pmd0136	524.37	184.07	523.364	C26H54NO7P	[M+H]+	LysoPC 18:0(2n isomer)*	Lipids	LPC	-	1	35782	24793	28277	19794	17941	20243	33182	34332	38417	37531	35970	38282	30530	32536	30882	57711	52457	56406	43390	38115	43415	27623	32768	27908	412510	371980	388660	321850	408120	384020	80479	91728	80298	101600	--	--
Lmhp007598	534.36	184.07	533.348	C27H52NO7P	[M+H]+	LysoPC 19:2(2n isomer)	Lipids	LPC	-	2	8803.2	10955	10315	7654.7	8499.4	8881.4	2287.5	2957.7	2223.3	2568.6	2552.3	2838.9	3274.1	3697.6	4217.1	5282.9	6441.6	7491.9	8080.7	5121.2	4879.5	3071.5	2789.9	3153.2	9990.1	10041	10224	9051.2	7087.6	6402.1	7763.3	7460.7	6889	6644.2	--	--
HJAP172	535.32	148.11	534.32	C31H42N4O4	[M+H]+	Scutianine C	Amino acids and derivatives	Amino acids and derivatives	53766-26-0	2	3113300	3754500	3466700	2751500	2275900	2174500	628400	586750	628940	402400	385590	447350	314540	270320	310460	9	9	9	9	9	9	9	9	9	9	9	9	9	9	9	678630	660010	634470	660160	--	--
pmp000880	535.33	192.1	534.321	C31H42N4O4	[M+H]+	Frangufoline	Organic acids	Organic acids	19526-09-1	1	18829	19741	17354	6874.7	5202.3	3644.4	1890	1866.1	2810.4	1646.3	1238.1	1399.3	1596	1591.5	1528.8	9	9	9	9	9	9	9	9	9	9	9	9	9	9	9	2057.1	2783	2632.9	1807	--	--
Lmhp010908	536.37	184.07	535.364	C27H54NO7P	[M+H]+	LysoPC 19:1	Lipids	LPC	-	3	19411	17653	17014	9531.9	11965	13727	6179.2	7711.8	6723.2	6918.3	7397.4	8086	11594	12022	11496	4118.2	4727.2	4111.2	3773.2	2806.7	5837.3	7483.7	7833.7	5840.9	109710	113980	151060	171460	260870	209030	28045	24620	25419	33948	--	--
Zmfn000481	535.04	323.03	536.044	C14H22N2O16P2	[M-H]-	Uridine-5'-Diphosphate-D-Xylose	Nucleotides and derivatives	Nucleotides and derivatives	-	2	140080	123970	128680	159600	210460	179210	223280	173610	237360	174370	145630	154170	161420	172720	142180	220850	175350	224690	224660	206870	180450	446600	429540	460530	402960	411610	391510	397560	366050	379100	224540	252350	190730	201540	C00190	ko00520,ko00908,ko01100
pmb2228	538.39	184.07	537.379	C27H56NO7P	[M+H]+	LysoPC 19:0	Lipids	LPC	108273-88-7	3	5236.1	4588.8	6396.4	2647.3	4177	3821.9	1892.8	2779.2	2742.6	2734.2	2650	3094.7	1787.6	2037.7	3028.4	9806.8	11920	10454	6640.4	8892.4	7344	566.94	894.66	568.63	5554.6	7808.9	9108.4	7592.6	5051.6	7843.1	3791.8	2912.7	2495	4246.3	--	--
Lmhp009890	546.36	184.07	545.348	C28H52NO7P	[M+H]+	LysoPC 20:3	Lipids	LPC	1199257-41-4	1	18006	20962	19636	7879.4	11023	8728.4	1912.8	1572.7	1954.4	1426.9	1539.9	1912.3	2721	2641.7	3479.7	9787.1	7147.1	5038.8	8701.8	7838.3	8048.6	2010.3	1737.6	2101.2	4763.5	2932.8	4317.9	2893.8	3995.8	2799.7	5030.3	4908.9	4789.9	5083.1	--	--
pmd0146	548.37	184.07	547.364	C28H54NO7P	[M+H]+	LysoPC 20:2(2n isomer)*	Lipids	LPC	-	3	28114	30739	31350	28938	25606	31881	24750	24576	25252	25013	22884	26660	35350	34328	35956	22511	19541	19471	20088	21707	21437	37806	37032	36026	323020	306650	378500	609570	693860	689520	100410	97928	93638	93104	--	--
pmd0147	548.37	184.07	547.364	C28H54NO7P	[M+H]+	LysoPC 20:2*	Lipids	LPC	-	3	50313	58414	49651	21484	18334	19921	2002.5	2437	2969.1	2279.6	2356.5	3791.1	2827.2	2964.8	2962.3	25727	28282	23572	28850	32060	28814	3951.8	3733.4	3039.3	13605	11872	9	9	9	9	10509	12018	11524	12214	--	--
pmn001672	547.17	223.1	548.174	C23H32O15	[M-H]-	Furanofructosyl-α-D-(3-mustard acyl)glucoside	Organic acids	Organic acids	-	2	6300	3650.8	8561.1	7996.2	5831.1	8292.6	12217	9064.7	9	9	7328.1	12496	7945.4	9	9	39062	33974	32544	17447	18677	17999	7058.4	14376	17004	33713	49302	31781	50709	58480	62065	24163	20326	15739	22932	--	--
Lmhp011549	550.39	184.07	549.379	C28H56NO7P	[M+H]+	LysoPC 20:1	Lipids	LPC	-	1	529630	494030	481480	219040	190210	216950	75216	65730	65794	47270	46545	48832	83983	64600	75868	54552	51463	58194	59261	67396	65284	73929	78673	67623	451020	368530	421530	447180	526540	507150	221450	222340	229260	197570	--	--
pmd0142	552.4	184.07	551.395	C28H58NO7P	[M+H]+	LysoPC 20:0(2n isomer)	Lipids	LPC	-	3	18761	17924	16899	8019.4	7655.5	8464.6	2763.2	3414.7	2584.9	1870.2	2376	2489.9	2906.8	3361.1	3162.1	2165.6	2191.5	3195.9	2431	2972.8	2434	3228.8	2579.2	2941.6	18541	16467	16440	17680	20137	20252	8417.1	7859.6	8974.4	7954.9	--	--
pmb2922	565.05	323.1	566.055	C15H24N2O17P2	[M-H]-	Uridine 5'-diphospho-D-glucose	Nucleotides and derivatives	Nucleotides and derivatives	133-89-1	1	1325700	1870300	1539300	1727500	1536700	1880300	859420	884280	858340	882760	792330	865240	1197400	840270	844440	2455100	2075100	1927500	2225500	2127800	2197800	2739800	2490000	2175300	1255800	1325600	1652100	1793700	2178800	2144100	1474900	1523800	1135900	1138800	C00029	ko00040,ko00052,ko00053,ko00240,ko00500,ko00520,ko00524,ko00561,ko00908,ko01100,ko01110,ko01240
mws1409	578.9	402.6	580.034	C15H22N2O18P2	[M-H]-	Uridine-5′-diphosphoglucuronic acid	Nucleotides and derivatives	Nucleotides and derivatives	-	3	14710	14745	13729	33020	21709	34006	4246	10159	17936	19922	15542	11432	18550	7462	7614.2	29592	18726	37300	33516	36910	24436	34388	20672	28046	22222	30745	32963	26532	38566	33486	25770	23056	19004	16898	--	--
Lmqn000780	606.08	384.98	607.082	C17H27N3O17P2	[M-H]-	Uridine 5'-diphospho-N-acetylglucosamine	Nucleotides and derivatives	Nucleotides and derivatives	528-04-1	1	22785	23340	21960	16874	21296	22776	49233	43214	53989	40144	33538	51593	52376	45119	58268	31962	32219	38455	32209	35769	27172	49357	58685	41232	79919	88949	86046	130930	135600	138550	40572	39589	34007	41845	C00043	ko00520,ko00524,ko01100
mws4134	611.14	306.08	612.152	C20H32N6O12S2	[M-H]-	Oxiglutatione	Amino acids and derivatives	Amino acids and derivatives	27025-41-8	3	117410	127850	130670	73009	59155	72422	9	9	9	9	9	9	9	9	9	272440	319690	276950	210620	185460	192400	44275	37466	29434	6111.3	10171	11841	21402	24175	29507	32653	39086	35629	32460	C00127	ko00480,ko01100,ko01240
Hmyp007792	636.41	495.4	635.414	C32H62NO9P	[M+H]+	PE(oxo-11:0/16:0)	Lipids	Glycerol ester	-	2	3107	3787.1	2141	13414	12749	12716	10973	9428.4	8781.6	5596.1	6127.2	6388.3	8136.7	8215.2	7246.1	9	373.43	388.31	9	476.83	320.27	16837	20238	18257	9364.2	8972.7	10477	6745	7733.5	7968.1	13851	11432	11885	12988	--	--
pmb0530	664.12	136.2	663.109	C21H27N7O14P2	[M+H]+	Nicotinic acid adenine dinucleotide	Nucleotides and derivatives	Nucleotides and derivatives	53-84-9	3	159950	197770	114860	200060	191300	236800	474590	486690	425180	353230	392510	425020	489370	307980	345650	401890	342010	251850	344160	403140	319840	373470	342330	478530	684630	608730	539030	761440	634020	703620	252030	357940	371390	373080	C00003	ko00190,ko00730,ko00760,ko01100,ko01240
Lmhp008513	677.37	261.22	676.367	C33H56O14	[M+H]+	2-α-Linolenoyl-glycerol-1,3-di-O-glucoside*	Lipids	Glycerol ester	-	1	8229	10688	11009	2638.3	3747.3	5074.4	2677.3	4056.8	3203.6	3583.6	1034.3	4840.8	4784.1	6690.4	7339.3	12552	11532	13073	16086	21828	13833	5720.6	5944.9	3617.4	67860	103190	95894	86737	79006	95082	28142	28711	23198	24377	--	--
pmp001276	677.37	677.37	676.367	C33H56O14	[M+H]+	1-Linolenoyl-rac-glycerol-diglucoside*	Lipids	Free fatty acids	-	1	114620	78356	113280	69308	52649	70022	33161	27435	39204	56389	40398	55254	68143	60993	49504	142790	130320	140530	145690	131730	130820	52362	46705	65372	37658	39305	32511	29503	26192	28653	57098	72190	60224	133420	--	--
Lmhp009190	679.39	263.24	678.383	C33H58O14	[M+H]+	2-Linoleoylglycerol-1,3-di-O-glucoside	Lipids	Glycerol ester	-	1	2533.1	5292.2	3391.6	9	1147.9	9	9	9	9	9	618.93	9	9	9	569.79	9881.3	5255	6972.9	8089.8	7475	8230.6	1869.9	1476.5	1290	17284	15319	14393	6865	7140.7	7020.3	5300.7	7998.9	7375.6	3155.1	--	--
HJN108	694.37	61.99	695.368	C40H49N5O6	[M-H]-	Jubanine A	Organic acids	Organic acids	60375-07-7	2	217270	240750	235380	437460	403280	388650	340860	354540	354780	267590	265160	281170	323490	416280	328910	186200	165000	165190	181360	174670	200400	395250	417390	440020	275820	238490	239820	89282	78630	77520	280180	253420	253760	248470	--	--
pme2651	742.1	620.1	743.075	C21H28N7O17P3	[M-H]-	NADP (Nicotinamide adenine dinucleotide phosphate)	Nucleotides and derivatives	Nucleotides and derivatives	53-59-8	3	43691	45312	37398	45696	42038	51699	51358	22480	34438	25944	41832	45154	33576	30180	25056	42164	32149	39669	28467	23738	28212	66926	76094	62261	99723	64998	73271	66312	51880	45000	38115	36321	39994	56083	C00006	ko00195,ko00480,ko00760,ko01100,ko01240
Hmyp007589	784.47	643.46	783.466	C41H70NO11P	[M+H]+	PE(18:3/18:3+O3)	Lipids	Glycerol ester	-	3	79558	53979	50519	80066	73492	76658	31120	31448	22844	20685	16898	20472	26298	20873	18682	1550.8	1344.1	647.02	2078.3	2467.3	2181.5	26176	25984	25455	16482	14352	14869	12612	13944	9437.8	30448	17442	26551	26259	--	--
pme2746	784.15	437	785.157	C27H33N9O15P2	[M-H]-	Riboflavin 5'-Adenosine Diphosphate	Nucleotides and derivatives	Nucleotides and derivatives	146-14-5	2	126750	106050	139650	116010	126090	135210	266070	280280	330940	330890	311090	310750	319320	564990	248360	80615	90959	91615	97163	122820	81611	146820	159130	141350	105830	132910	140860	143800	161770	141270	172260	152590	135570	94494	C00016	ko00740,ko01100,ko01110,ko01240

## Sheet: Table S2
Table S2 The primers used in this study.
Gene ID	Gene name	Forward primers (5'→3')	Reverse primers (5'→3')
LOC107409505	ZjHAP3	ACCTACCGATCGCAAACATC	CACAACAAATCATCGCCATT
LOC107428978	ZjTCP14	TCTGCACCTTCACACCTGAG	TTGCTTAGCTTGCAACATGG
LOC107424991	ZjMDH	TCCATGCTCTTTCACTGCAC	CAGTCACCTGAGAAGCCACA
LOC112488991	ZjAGL61	CAAAGAGGCGTAAGGGTTTG	AGCGGTGTGGGTATGTGAGT
LOC107428076	ZjGARP	CAATTGCGAATTGAAGAGCA	TCTGCTTCAGCCGTTTAGGT
LOC107416375	ZjCSY2	TGGGATTTCCACCAGAGTTC	CGCTCTTTCAGTGGCATGTA
LOC107426335	ZjSUSY	CCTTCCAACATTTGCCACTT	ACACCCGCCAAAGTCATTAG
LOC107426114	ZjMYB78	GAGTCCAAAAGCAAGCCAAG	GTGGAGGTAGTGGAGGTGGA
LOC107403720	ZjSKU5	AGTGGTGCACGACCTAATCC	TTGGTGTGGAAGGATTGACA
LOC107403723	ZjYABBY1	ATCAAGGACGAGATCCAACG	CATCTTCACCCTCTGGGAAA
	ZjUBQ	TGGATGATTCTGGCAAAG	GTAATGGCGGTCAAAGTG

## Sheet: Table S3
Table S3 Transcriptome data details.
Sample	Raw Reads	Clean Reads	Clean Base(G)	Error Rate(%)	Q20(%)	Q30(%)	GC Content(%)
ST1-1	49344672	47368558	7.11	0.03	96.16	90.37	43.65
ST1-2	47251274	45323618	6.8	0.03	95.65	89.26	43.53
ST1-3	46457386	44560780	6.68	0.03	95.9	89.86	43.89
ST2-1	47013346	44999284	6.75	0.03	95.73	89.44	43.69
ST2-2	44663406	43038254	6.46	0.03	95.59	89.1	43.77
ST2-3	49835856	47982508	7.2	0.03	96.11	90.18	43.78
ST3-1	48993686	47137136	7.07	0.03	95.89	89.78	44.21
ST3-2	48679142	46986108	7.05	0.03	96.02	90.04	44.21
ST3-3	48795732	47254246	7.09	0.03	96.04	90.01	44.18
ST4-1	49098926	47437702	7.12	0.03	95.99	89.92	43.99
ST4-2	49916878	48030800	7.2	0.03	95.92	89.81	43.97
ST4-3	47225914	45865992	6.88	0.03	95.72	89.4	43.96
ST5-1	44128588	42467654	6.37	0.03	95.38	88.71	44.05
ST5-2	44676200	42944730	6.44	0.03	95.61	89.26	44.1
ST5-3	45666174	44032558	6.6	0.03	95.64	89.31	44.02
HK1-1	46266258	44383446	6.66	0.03	95.66	89.31	43.56
HK1-2	47592472	45633242	6.84	0.03	95.61	89.25	43.66
HK1-3	47526862	45462250	6.82	0.03	95.94	89.91	43.87
HK2-1	48179242	45764916	6.86	0.03	95.93	89.89	43.74
HK2-2	47456974	45336022	6.8	0.03	95.89	89.83	43.63
HK2-3	49650960	47533912	7.13	0.03	96.04	90.14	43.65
HK3-1	49093770	46562384	6.98	0.03	95.88	89.84	44.02
HK3-2	45096428	43068864	6.46	0.03	95.53	89.11	43.95
HK3-3	48412548	46197526	6.93	0.03	95.87	89.8	44.19
HK4-1	47939884	45845884	6.88	0.03	96.14	90.34	43.93
HK4-2	54640792	51278440	7.69	0.03	95.73	89.49	44.01
HK4-3	50478776	46805842	7.02	0.03	95.55	89.13	43.69
HK5-1	49744184	46819094	7.02	0.03	95.55	89.14	43.84
HK5-2	50668560	48383378	7.26	0.03	96.25	90.54	44
HK5-3	47946656	45180496	6.78	0.03	95.97	90.02	43.84

## Sheet: Table S4
Table S4 Transcription factors associated with sugars and organic acids.
ID	moduleColors	Description	At desc	GO	TF-Family	ST1-1	ST1-2	ST1-3	ST2-1	ST2-2	ST2-3	ST3-1	ST3-2	ST3-3	ST4-1	ST4-2	ST4-3	ST5-1	ST5-2	ST5-3	HK1-1	HK1-2	HK1-3	HK2-1	HK2-2	HK2-3	HK3-1	HK3-2	HK3-3	HK4-1	HK4-2	HK4-3	HK5-1	HK5-2	HK5-3	ST1	ST2	ST3	ST4	ST5	HK1	HK2	HK3	HK4	HK5
LOC107403596	blue	protein LOL1	At1g32540	GO:0005634,nucleus; GO:0030154,cell differentiation; GO:0031348,negative regulation of defense response; GO:0034051,negative regulation of plant-type hypersensitive response; GO:0009626,plant-type hypersensitive response; GO:0045595,regulation of cell differentiation; GO:0008150,biological_process; GO:0009987,cellular process; GO:0032502,developmental process; GO:0048869,cellular developmental pr…	C2C2-LSD	47.81	44.48	44.09	46.51	48.34	44.72	2.15	3.53	2.53	3.94	4.67	3.67	2.1	1.74	1.19	34.7	30.24	35.2	32.39	37.73	34.35	7.61	6.46	6.41	4	4.05	4.33	2.25	2.45	2.02	45.46	46.5233	2.73667	4.09333	1.67667	33.38	34.8233	6.82667	4.12667	2.24
LOC107403723	turquoise	axial regulator YABBY 1	estExt_Genewise1_v1.C_1270153	GO:0005634,nucleus; GO:0003677,DNA binding; GO:0003700,DNA-binding transcription factor activity; GO:0046872,metal ion binding; GO:0010158,abaxial cell fate specification; GO:0045165,cell fate commitment; GO:0010154,fruit development; GO:0010450,inflorescence meristem growth; GO:0009933,meristem structural organization; GO:0009944,polarity specification of adaxial/abaxial axis; GO:0009909,regulat…	C2C2-YABBY	42.41	38.7	43.46	43.15	39.25	38.12	1.96	2.94	2.88	1.8	1.46	2.46	0.88	0.45	1.08	92.62	81.8	94.38	94.49	110.28	103.63	10.29	9.52	10.35	1.39	1.15	1.74	0.55	0.48	0.45	41.5233	40.1733	2.59333	1.90667	0.803333	89.6	102.8	10.0533	1.42667	0.493333
LOC107403759	brown	transcription factor MYB62-like	At1g68320	GO:0005634,nucleus; GO:0003700,DNA-binding transcription factor activity; GO:0000981,DNA-binding transcription factor activity, RNA polymerase II-specific; GO:0043565,sequence-specific DNA binding; GO:0001135,RNA polymerase II transcription regulator recruiting activity; GO:0044212,transcription regulatory region DNA binding; GO:0030154,cell differentiation; GO:0016036,cellular response to phosph…	MYB	0.76	0.82	0.91	0.82	0.43	0.57	18.78	19.82	17.91	16.66	15.88	14.61	14.62	17.9	16.32	1.46	1.47	1.7	0.73	0.59	0.56	3.88	3.64	4.01	19.93	20.09	21.08	20.52	21.34	17.9	0.83	0.606667	18.8367	15.7167	16.28	1.54333	0.626667	3.84333	20.3667	19.92
LOC107403860	turquoise	transcription factor bHLH87	At3g21330	GO:0005634,nucleus; GO:0003677,DNA binding; GO:0003700,DNA-binding transcription factor activity; GO:0046983,protein dimerization activity; GO:0006355,regulation of transcription, DNA-templated; GO:0006351,transcription, DNA-templated; GO:0003674,molecular_function; GO:0003676,nucleic acid binding; GO:0005488,binding; GO:0097159,organic cyclic compound binding; GO:1901363,heterocyclic compound bi…	bHLH	0.05	0	0	0	0	0.02	0.42	0.2	0.27	0.41	0.49	0.57	0.34	0.6	0.43	0	0	0	0	0	0	0.44	0.26	0.08	0.05	0.14	0.07	0.21	0.32	0.44	0.0166667	0.00666667	0.296667	0.49	0.456667	0	0	0.26	0.0866667	0.323333
LOC107403864	turquoise	two-component response regulator ORR10-like	At3g57040	GO:0005634,nucleus; GO:0009736,cytokinin-activated signaling pathway; GO:0000160,phosphorelay signal transduction system; GO:0006355,regulation of transcription, DNA-templated; GO:0006351,transcription, DNA-templated; GO:0007165,signal transduction; GO:0007154,cell communication; GO:0008150,biological_process; GO:0009719,response to endogenous stimulus; GO:0009725,response to hormone; GO:0009735,…	Others	7.3	10.93	7.95	5.77	4.64	4.56	2.08	1.94	2.27	2.62	2.35	2.77	4.64	3.06	2.43	7.25	7.91	9.16	13.2	11.78	13.08	4.83	3.89	5.08	4.16	3.3	4.04	4.72	4.57	4.82	8.72667	4.99	2.09667	2.58	3.37667	8.10667	12.6867	4.6	3.83333	4.70333
LOC107403944	turquoise	BEL1-like homeodomain protein 1	At2g35940	GO:0005737,cytoplasm; GO:0005634,nucleus; GO:0003677,DNA binding; GO:0003700,DNA-binding transcription factor activity; GO:0046982,protein heterodimerization activity; GO:0042803,protein homodimerization activity; GO:0010197,polar nucleus fusion; GO:0009737,response to abscisic acid; GO:0010201,response to continuous far red light stimulus by the high-irradiance response system; GO:0009610,respon…	HB-BELL	75.23	80.09	74.16	119.11	108.98	124.39	190.22	184.25	196	243.98	237.43	249.86	182.39	177.17	182.74	83.89	86.22	77.46	76.14	66.67	72.37	193.35	174.38	180.19	126.16	128.92	136.6	188.27	177.8	192.54	76.4933	117.493	190.157	243.757	180.767	82.5233	71.7267	182.64	130.56	186.203
LOC107403961	brown	transcription factor HBP-1b(c38)-like	#N/A	GO:0005634,nucleus; GO:0003700,DNA-binding transcription factor activity; GO:0043565,sequence-specific DNA binding; GO:0006351,transcription, DNA-templated; GO:0140110,transcription regulator activity; GO:0003674,molecular_function; GO:0003676,nucleic acid binding; GO:0003677,DNA binding; GO:0005488,binding; GO:0097159,organic cyclic compound binding; GO:1901363,heterocyclic compound binding; GO:…	bZIP	75.8	74.24	72.25	62.02	58.01	64.21	102.64	104.51	102.78	94.46	96.13	96.48	98.82	106.42	99.7	61.17	59.42	57.8	53.26	49.48	56.1	76.3	74.21	75.97	87.48	88.55	90.6	105.49	103.16	102.16	74.0967	61.4133	103.31	95.69	101.647	59.4633	52.9467	75.4933	88.8767	103.603
LOC107404186	brown	uncharacterized LOC107404186	estExt_fgenesh4_pg.C_LG_I1047	GO:0000783,nuclear telomere cap complex; GO:0003691,double-stranded telomeric DNA binding; GO:0006355,regulation of transcription, DNA-templated; GO:0031627,telomeric loop formation; GO:0006351,transcription, DNA-templated; GO:0003674,molecular_function; GO:0003676,nucleic acid binding; GO:0003677,DNA binding; GO:0003690,double-stranded DNA binding; GO:0005488,binding; GO:0042162,telomeric DNA bi…	MYB-related	8.34	9.22	9.04	10.8	10.85	10.25	2.7	2.19	2.8	2.76	3.34	3.3	2.63	2.71	2.71	10.16	9.88	11.94	10.35	9.6	9.49	8.4	8	8.29	4.4	5.13	6.85	2.03	2.08	2.18	8.86667	10.6333	2.56333	3.13333	2.68333	10.66	9.81333	8.23	5.46	2.09667
LOC107404189	turquoise	zinc finger CCCH domain-containing protein 29-like	At2g40140	GO:0005634,nucleus; GO:0003677,DNA binding; GO:0003700,DNA-binding transcription factor activity; GO:0046872,metal ion binding; GO:0050832,defense response to fungus; GO:0006355,regulation of transcription, DNA-templated; GO:0010200,response to chitin; GO:0009409,response to cold; GO:0003674,molecular_function; GO:0003676,nucleic acid binding; GO:0005488,binding; GO:0097159,organic cyclic compoun…	C3H	148.45	145.5	136.26	155.18	138.74	148.83	26.15	26.68	27.09	50.53	50.29	48.67	38.29	38.43	38.95	199.77	212.32	196.25	225.81	177.94	216.78	89.49	89.04	88.01	141.88	138.97	149.86	57.8	58.62	58.48	143.403	147.583	26.64	49.83	38.5567	202.78	206.843	88.8467	143.57	58.3
LOC107404288	blue	uncharacterized LOC107404288	At4g29080	GO:0005634,nucleus; GO:0003700,DNA-binding transcription factor activity; GO:0009734,auxin-activated signaling pathway; GO:0009733,response to auxin; GO:0006351,transcription, DNA-templated; GO:0140110,transcription regulator activity; GO:0003674,molecular_function; GO:0007165,signal transduction; GO:0007154,cell communication; GO:0008150,biological_process; GO:0009719,response to endogenous stim…	AUX/IAA	18.17	20.22	18.86	16.35	11.42	13.66	0.69	0.42	0.46	0.56	0.62	0.71	0.41	0.45	0.78	14.74	13.54	14.84	17.36	17.3	16.18	4.43	4.24	4.77	0.61	0.93	0.65	0.35	0.15	0.4	19.0833	13.81	0.523333	0.63	0.546667	14.3733	16.9467	4.48	0.73	0.3
LOC107404339	turquoise	protein LATERAL ROOT PRIMORDIUM 1	SHI2	GO:0005634,nucleus; GO:0003677,DNA binding; GO:0046872,metal ion binding; GO:0046982,protein heterodimerization activity; GO:0009851,auxin biosynthetic process; GO:0009734,auxin-activated signaling pathway; GO:0007275,multicellular organism development; GO:0045893,positive regulation of transcription, DNA-templated; GO:0003674,molecular_function; GO:0003676,nucleic acid binding; GO:0005488,bindin…	SRS	51.23	49.89	52.93	34.77	32.73	36.76	3.42	5.05	4.56	6.05	5.48	5.94	4	4.2	3.81	54.82	55.06	56.67	57.29	58.78	60.02	22.45	23.26	21.94	5.95	6.73	6.49	6.5	7.16	7.37	51.35	34.7533	4.34333	5.82333	4.00333	55.5167	58.6967	22.55	6.39	7.01
LOC107404781	turquoise	zinc finger CCCH domain-containing protein 48-like	At5g51980	GO:0003677,DNA binding; GO:0046872,metal ion binding; GO:0003674,molecular_function; GO:0003676,nucleic acid binding; GO:0005488,binding; GO:0097159,organic cyclic compound binding; GO:1901363,heterocyclic compound binding; GO:0043167,ion binding; GO:0043169,cation binding	C3H	2.86	2.86	2.38	3.1	2.42	2.91	0.75	0.2	0.81	0.64	0.85	1.04	1.22	0.73	0.83	3.21	3.45	2.58	4.07	2.67	4.36	2.83	2.27	2.31	0.75	1.24	0.89	1.16	1.69	1.2	2.7	2.81	0.586667	0.843333	0.926667	3.08	3.7	2.47	0.96	1.35
LOC107404986	blue	ethylene-responsive transcription factor ERF018-like	eugene3.00280058	GO:0005634,nucleus; GO:0003677,DNA binding; GO:0003700,DNA-binding transcription factor activity; GO:0009873,ethylene-activated signaling pathway; GO:0006351,transcription, DNA-templated; GO:0003674,molecular_function; GO:0003676,nucleic acid binding; GO:0005488,binding; GO:0097159,organic cyclic compound binding; GO:1901363,heterocyclic compound binding; GO:0140110,transcription regulator activi…	AP2/ERF-ERF	38.72	35.52	35.87	22.18	22.83	18.99	1.02	0.38	0.16	0.83	0.85	1.49	0.07	0.28	0.21	25.87	26.54	29.15	27.6	23.72	24.8	5.46	4.37	5.56	3.77	5.11	2.18	0.39	0.13	0.07	36.7033	21.3333	0.52	1.05667	0.186667	27.1867	25.3733	5.13	3.68667	0.196667
LOC107405213	turquoise	ethylene-responsive transcription factor RAP2-4-like	DREB19	GO:0005634,nucleus; GO:0003677,DNA binding; GO:0003700,DNA-binding transcription factor activity; GO:0043565,sequence-specific DNA binding; GO:0071472,cellular response to salt stress; GO:0009736,cytokinin-activated signaling pathway; GO:0009873,ethylene-activated signaling pathway; GO:0045595,regulation of cell differentiation; GO:0009409,response to cold; GO:0009416,response to light stimulus; …	AP2/ERF-ERF	124.72	124.73	124.99	123.17	113.55	120.08	46.15	46	50.14	52.43	54.51	51.17	37.96	38.08	39.89	259.01	253.57	253.57	217.59	199.08	223.34	141.01	135.22	131.43	67.62	72.6	83.43	38.55	40.85	42.54	124.813	118.933	47.43	52.7033	38.6433	255.383	213.337	135.887	74.55	40.6467
LOC107405268	brown	probable acetyltransferase NATA1-like	gw1.VIII.1066.1	GO:0009507,chloroplast; GO:0008080,N-acetyltransferase activity; GO:0006591,ornithine metabolic process; GO:0003674,molecular_function; GO:0003824,catalytic activity; GO:0016407,acetyltransferase activity; GO:0016410,N-acyltransferase activity; GO:0016740,transferase activity; GO:0016746,transferase activity, transferring acyl groups; GO:0016747,transferase activity, transferring acyl groups othe…	GNAT	28.37	24.4	33.11	23.01	22.66	22.4	9.37	9.96	9.21	5.06	6.63	5.64	7.67	5.29	6.48	32.16	29.54	31.76	28.49	27.73	30.42	22.2	22.05	21.97	13.21	10.73	11.16	4.86	3.05	3.43	28.6267	22.69	9.51333	5.77667	6.48	31.1533	28.88	22.0733	11.7	3.78
LOC107405325	brown	histone-lysine N-methyltransferase ASHH3	At2g44150	GO:0000775,chromosome, centromeric region; GO:0005783,endoplasmic reticulum; GO:0005634,nucleus; GO:0009506,plasmodesma; GO:0018024,histone-lysine N-methyltransferase activity; GO:0016279,protein-lysine N-methyltransferase activity; GO:0003674,molecular_function; GO:0003824,catalytic activity; GO:0008168,methyltransferase activity; GO:0008170,N-methyltransferase activity; GO:0008276,protein methy…	SET	19.19	22.34	20.23	17.86	15.67	20.12	5.16	6	6.36	11.85	9.47	12.25	5.32	5.85	5.4	20.05	19.87	19.14	21.62	18.64	21.57	11.08	11.2	11.93	8.76	8.21	9.29	7.33	6.64	5.28	20.5867	17.8833	5.84	11.19	5.52333	19.6867	20.61	11.4033	8.75333	6.41667
LOC107405802	brown	putative dehydration-responsive element-binding protein 2H	#N/A	GO:0005634,nucleus; GO:0003677,DNA binding; GO:0003700,DNA-binding transcription factor activity; GO:0006351,transcription, DNA-templated; GO:0003674,molecular_function; GO:0003676,nucleic acid binding; GO:0005488,binding; GO:0097159,organic cyclic compound binding; GO:1901363,heterocyclic compound binding; GO:0140110,transcription regulator activity; GO:0008152,metabolic process; GO:0006139,nucl…	AP2/ERF-ERF	10.2	8.36	7.31	8.49	9.52	10.31	1.25	1.46	1.5	1.28	1.44	1.38	0.73	0.68	0.89	9.25	9.2	9.03	9.2	11.9	9.79	3.21	3.12	3.5	0.99	0.9	1.06	0.65	1.02	0.9	8.62333	9.44	1.40333	1.36667	0.766667	9.16	10.2967	3.27667	0.983333	0.856667
LOC107406208	turquoise	squamosa promoter-binding protein 1-like	eugene3.00640244	GO:0005737,cytoplasm; GO:0005634,nucleus; GO:0003677,DNA binding; GO:0003700,DNA-binding transcription factor activity; GO:0046872,metal ion binding; GO:0009908,flower development; GO:0006355,regulation of transcription, DNA-templated; GO:0010321,regulation of vegetative phase change; GO:0006351,transcription, DNA-templated; GO:0003674,molecular_function; GO:0003676,nucleic acid binding; GO:00054…	SBP	7.57	10.58	7.51	15.15	21.05	19.11	2.2	1.79	1.4	0.66	1.64	1.29	0.56	0.64	0.95	43.14	41.09	42.98	41.28	41.58	40.06	7.45	7.74	10.26	1.32	2.21	0.83	0.76	0.65	0.44	8.55333	18.4367	1.79667	1.19667	0.716667	42.4033	40.9733	8.48333	1.45333	0.616667
LOC107406290	turquoise	probable WRKY transcription factor 70	grail3.0023037401	GO:0005634,nucleus; GO:0003700,DNA-binding transcription factor activity; GO:0043565,sequence-specific DNA binding; GO:0042742,defense response to bacterium; GO:0050832,defense response to fungus; GO:0009864,induced systemic resistance, jasmonic acid mediated signaling pathway; GO:1900056,negative regulation of leaf senescence; GO:0045892,negative regulation of transcription, DNA-templated; GO:00…	WRKY	26.88	29.81	30.7	67.44	51.63	48.83	4.43	4.09	2.8	8.94	9.71	7.09	8.32	10.73	10.63	79.39	72	67.1	91.05	92.39	90.98	9.33	13.07	8.68	16.38	12.94	15.66	2.41	1.68	2.37	29.13	55.9667	3.77333	8.58	9.89333	72.83	91.4733	10.36	14.9933	2.15333
LOC107406320	red	basic leucine zipper 9	At5g24800	GO:0005634,nucleus; GO:0003677,DNA binding; GO:0003700,DNA-binding transcription factor activity; GO:0046982,protein heterodimerization activity; GO:0042803,protein homodimerization activity; GO:0071333,cellular response to glucose stimulus; GO:0006351,transcription, DNA-templated; GO:0003674,molecular_function; GO:0003676,nucleic acid binding; GO:0005488,binding; GO:0097159,organic cyclic compou…	bZIP	12.25	14.06	15.38	17.45	18.56	16.29	509.2	484.07	492.59	253.24	257.95	246.19	399.09	407.74	402.21	43.86	47.37	50.26	42.39	34.58	39.1	78.65	93.43	83.02	97.26	102.55	113.74	153.18	144.01	151.97	13.8967	17.4333	495.287	252.46	403.013	47.1633	38.69	85.0333	104.517	149.72
LOC107406933	blue	probable WRKY transcription factor 40	Pt-WRKY40.1	GO:0005634,nucleus; GO:0003700,DNA-binding transcription factor activity; GO:0043565,sequence-specific DNA binding; GO:0044212,transcription regulatory region DNA binding; GO:0042742,defense response to bacterium; GO:0050832,defense response to fungus; GO:0045892,negative regulation of transcription, DNA-templated; GO:0031347,regulation of defense response; GO:0010200,response to chitin; GO:00022…	WRKY	6.51	6.68	6.64	2.36	1.87	2.35	0.28	0.1	0.23	0.4	0.15	0.33	0.13	0.2	0.11	3	3.02	2.97	2.25	2.13	2.18	0.51	0.57	0.41	1.28	1.04	1.2	0.51	0.24	0.19	6.61	2.19333	0.203333	0.293333	0.146667	2.99667	2.18667	0.496667	1.17333	0.313333
LOC107407147	brown	auxin response factor 19-like	#N/A	GO:0005634,nucleus; GO:0003677,DNA binding; GO:0009734,auxin-activated signaling pathway; GO:0006355,regulation of transcription, DNA-templated; GO:0006351,transcription, DNA-templated; GO:0003674,molecular_function; GO:0003676,nucleic acid binding; GO:0005488,binding; GO:0097159,organic cyclic compound binding; GO:1901363,heterocyclic compound binding; GO:0007165,signal transduction; GO:0007154,…	B3-ARF	8.13	10.46	10.29	10.86	10.21	12.44	1.36	1.19	0.92	2.55	1.63	1.54	0.76	0.69	0.82	10.69	10.69	12.63	12.5	8.61	15.01	7.93	5.96	6.28	1.71	2.16	1.53	0.81	0.77	0.51	9.62667	11.17	1.15667	1.90667	0.756667	11.3367	12.04	6.72333	1.8	0.696667
LOC107407304	blue	probable WRKY transcription factor 40	Pt-WRKY40.1	GO:0005634,nucleus; GO:0003700,DNA-binding transcription factor activity; GO:0043565,sequence-specific DNA binding; GO:0044212,transcription regulatory region DNA binding; GO:0042742,defense response to bacterium; GO:0050832,defense response to fungus; GO:0045892,negative regulation of transcription, DNA-templated; GO:0031347,regulation of defense response; GO:0010200,response to chitin; GO:00022…	WRKY	51.63	49.79	50.74	14.9	15.4	16.01	1.11	0.75	0.74	2.56	2.81	1.83	0.74	1.79	1.15	29.81	28.5	26.38	23.23	18.5	22.69	2.75	2.38	2.43	9.32	8.56	9.93	3.85	3.51	4.16	50.72	15.4367	0.866667	2.4	1.22667	28.23	21.4733	2.52	9.27	3.84
LOC107407392	red	nuclear transcription factor Y subunit B-6-like	At5g47670	GO:0005634,nucleus; GO:0033613,activating transcription factor binding; GO:0003700,DNA-binding transcription factor activity; GO:0046982,protein heterodimerization activity; GO:0043565,sequence-specific DNA binding; GO:0009738,abscisic acid-activated signaling pathway; GO:0045893,positive regulation of transcription, DNA-templated; GO:0006355,regulation of transcription, DNA-templated; GO:0006351…	NF-YB	0	0	0	0	0	0	5.43	3.67	4.87	4.8	4.88	5.4	2.63	3.61	2.88	0	0.19	0	0	0	0	0	0.07	0	0.43	1.56	1.4	1.23	0.92	1.27	0	0	4.65667	5.02667	3.04	0.0633333	0	0.0233333	1.13	1.14
LOC107407398	turquoise	GATA transcription factor 26	eugene3.00290099	GO:0005634,nucleus; GO:0005667,transcription factor complex; GO:0003682,chromatin binding; GO:0000977,RNA polymerase II regulatory region sequence-specific DNA binding; GO:0001085,RNA polymerase II transcription factor binding; GO:0001228,DNA-binding transcription activator activity, RNA polymerase II-specific; GO:0008270,zinc ion binding; GO:0030154,cell differentiation; GO:0003674,molecular_fun…	C2C2-GATA	9.53	9.39	9.62	9.41	9.6	8.42	17.07	16.24	16.08	17.25	16.24	16.1	15.87	13.59	16.2	9.46	10.1	8.26	8.43	8.15	9.13	14.06	12.83	12.87	9.83	9.49	11.17	19.54	18.09	17.69	9.51333	9.14333	16.4633	16.53	15.22	9.27333	8.57	13.2533	10.1633	18.44
LOC107407657	turquoise	histidine kinase 2-like	At5g35750	GO:0005789,endoplasmic reticulum membrane; GO:0016021,integral component of membrane; GO:0005886,plasma membrane; GO:0009884,cytokinin receptor activity; GO:0042802,identical protein binding; GO:0019900,kinase binding; GO:0000155,phosphorelay sensor kinase activity; GO:0004673,protein histidine kinase activity; GO:0043424,protein histidine kinase binding; GO:0071215,cellular response to abscisic …	Others	0.82	1.32	2.54	1	1.16	1.02	0.1	0.1	0.09	0.24	0.46	0.23	0.13	0.08	0.3	1.31	2.3	1.13	1.5	2.53	3.02	0.48	1.25	0.54	0.18	0.24	0.29	0.14	0.19	0.24	1.56	1.06	0.0966667	0.31	0.17	1.58	2.35	0.756667	0.236667	0.19
LOC107407729	turquoise	NAC domain-containing protein 83-like	estExt_Genewise1_v1.C_LG_I7833	GO:0005634,nucleus; GO:0003677,DNA binding; GO:0003700,DNA-binding transcription factor activity; GO:0010150,leaf senescence; GO:0045892,negative regulation of transcription, DNA-templated; GO:0009737,response to abscisic acid; GO:0009651,response to salt stress; GO:0006351,transcription, DNA-templated; GO:0016032,viral process; GO:0010089,xylem development; GO:0003674,molecular_function; GO:0003…	NAC	8.53	8.24	6.93	4.73	3.45	6.06	1.24	0.91	1.13	2.29	2.18	2.66	2.82	2	2.37	12.27	12.11	12.02	10.38	8.31	9.94	5.67	6.26	5.87	5.73	5.79	3.99	3.28	2.43	2.81	7.9	4.74667	1.09333	2.37667	2.39667	12.1333	9.54333	5.93333	5.17	2.84
LOC107407869	turquoise	transcription factor DIVARICATA-like	At2g38090	GO:0005634,nucleus; GO:0003677,DNA binding; GO:0048262,determination of dorsal/ventral asymmetry; GO:0009908,flower development; GO:0006355,regulation of transcription, DNA-templated; GO:0006351,transcription, DNA-templated; GO:0003674,molecular_function; GO:0003676,nucleic acid binding; GO:0005488,binding; GO:0097159,organic cyclic compound binding; GO:1901363,heterocyclic compound binding; GO:0…	MYB	2.09	2.48	2.29	3.46	2.58	3.6	0.51	0.36	0.54	0.7	1.11	1.05	0.26	0.46	0.71	11.62	10.4	9.92	12.03	11.25	11.77	1.75	1.68	1.76	0.58	1.01	0.74	0.42	0.51	0.49	2.28667	3.21333	0.47	0.953333	0.476667	10.6467	11.6833	1.73	0.776667	0.473333
LOC107408332	turquoise	ethylene-responsive transcription factor RAP2-13-like	DREB19	GO:0005634,nucleus; GO:0003677,DNA binding; GO:0003700,DNA-binding transcription factor activity; GO:0043565,sequence-specific DNA binding; GO:0071472,cellular response to salt stress; GO:0009736,cytokinin-activated signaling pathway; GO:0009873,ethylene-activated signaling pathway; GO:0045595,regulation of cell differentiation; GO:0009409,response to cold; GO:0009416,response to light stimulus; …	AP2/ERF-ERF	131.98	133.47	128.53	94.22	96.68	94.17	45.05	40.41	39.77	55.52	56.65	51.48	39.09	41.1	40.4	168.18	169.33	175.47	146.91	130.79	156.44	61.94	58.27	52.79	64.8	68.05	75.12	31.83	35.56	38.55	131.327	95.0233	41.7433	54.55	40.1967	170.993	144.713	57.6667	69.3233	35.3133
LOC107408850	turquoise	squamosa promoter-binding-like protein 13A	#N/A	GO:0005634,nucleus; GO:0003677,DNA binding; GO:0003700,DNA-binding transcription factor activity; GO:0046872,metal ion binding; GO:0048653,anther development; GO:0006355,regulation of transcription, DNA-templated; GO:0006351,transcription, DNA-templated; GO:0003674,molecular_function; GO:0003676,nucleic acid binding; GO:0005488,binding; GO:0097159,organic cyclic compound binding; GO:1901363,heter…	SBP	3.41	3.42	2.97	5.18	3.47	3.54	0.23	0.11	0.13	0.26	0.19	0.71	0.22	0.11	0.07	22.38	21.17	21.11	19.08	21.12	21.49	4.5	4.41	5.49	1.82	1.86	1.03	0.13	0.1	0.43	3.26667	4.06333	0.156667	0.386667	0.133333	21.5533	20.5633	4.8	1.57	0.22
LOC107409384	turquoise	auxin response factor 18-like	eugene3.00660262	GO:0005634,nucleus; GO:0003677,DNA binding; GO:0003700,DNA-binding transcription factor activity; GO:0035198,miRNA binding; GO:0009738,abscisic acid-activated signaling pathway; GO:0009734,auxin-activated signaling pathway; GO:0051301,cell division; GO:0048589,developmental growth; GO:0010154,fruit development; GO:0048366,leaf development; GO:0007389,pattern specification process; GO:0048441,peta…	B3-ARF	8.83	9.21	8.87	4.1	3.73	4.14	0.46	0.06	0.11	0.32	0.26	0.12	0.12	0.12	0.02	5.71	6.31	6.56	8.41	9	8.94	0.53	0.59	0.43	0.08	0.25	0.07	0.13	0.07	0.15	8.97	3.99	0.21	0.233333	0.0866667	6.19333	8.78333	0.516667	0.133333	0.116667
LOC107409505	red	nuclear transcription factor Y subunit B-3-like	#N/A	GO:0005634,nucleus; GO:0046982,protein heterodimerization activity; GO:0043565,sequence-specific DNA binding; GO:0006355,regulation of transcription, DNA-templated; GO:0006351,transcription, DNA-templated; GO:0005515,protein binding; GO:0003674,molecular_function; GO:0005488,binding; GO:0046983,protein dimerization activity; GO:0003676,nucleic acid binding; GO:0003677,DNA binding; GO:0097159,orga…	NF-YB	25.57	23.58	27.21	25.87	28.77	29.06	50.03	48	47.72	46.4	42.73	40.48	48.92	56.03	53.11	15.27	15.81	13.05	16.59	17.69	15.82	24.61	26.26	23.67	28.41	35	27.34	34.27	35.62	33.75	25.4533	27.9	48.5833	43.2033	52.6867	14.71	16.7	24.8467	30.25	34.5467
LOC107409904	turquoise	homeobox protein knotted-1-like 5	estExt_Genewise1_v1.C_LG_II1820	GO:0005634,nucleus; GO:0043565,sequence-specific DNA binding; GO:0006355,regulation of transcription, DNA-templated; GO:0003674,molecular_function; GO:0003676,nucleic acid binding; GO:0003677,DNA binding; GO:0005488,binding; GO:0097159,organic cyclic compound binding; GO:1901363,heterocyclic compound binding; GO:0008152,metabolic process; GO:0006139,nucleobase-containing compound metabolic proces…	HB-other	3.14	2.51	2.32	2.81	2.89	2.3	0.49	0.28	0.55	1.12	0.28	0.51	0.04	0.31	0.41	5.49	4.59	7.28	4.45	5.02	4.71	1.6	1.98	1.61	0.22	0.68	0.65	0.29	0.55	0.55	2.65667	2.66667	0.44	0.636667	0.253333	5.78667	4.72667	1.73	0.516667	0.463333
LOC107409987	turquoise	NAC domain-containing protein 90-like	At5g22380	GO:0005634,nucleus; GO:0003677,DNA binding; GO:0003700,DNA-binding transcription factor activity; GO:0006351,transcription, DNA-templated; GO:0003674,molecular_function; GO:0003676,nucleic acid binding; GO:0005488,binding; GO:0097159,organic cyclic compound binding; GO:1901363,heterocyclic compound binding; GO:0140110,transcription regulator activity; GO:0008152,metabolic process; GO:0006139,nucl…	NAC	10.56	14.59	10.23	7.01	7.56	9.02	0.29	0.07	0.05	0.79	0.24	0.17	0.13	0.53	0.05	7.93	10.17	9.35	11.89	9.18	9.58	1.24	1.01	0.98	2.29	1.88	2.36	0.05	0.09	0.1	11.7933	7.86333	0.136667	0.4	0.236667	9.15	10.2167	1.07667	2.17667	0.08
LOC107410110	brown	GATA transcription factor 5	At5g66320	GO:0005634,nucleus; GO:0005667,transcription factor complex; GO:0003682,chromatin binding; GO:0003700,DNA-binding transcription factor activity; GO:0000977,RNA polymerase II regulatory region sequence-specific DNA binding; GO:0001085,RNA polymerase II transcription factor binding; GO:0001228,DNA-binding transcription activator activity, RNA polymerase II-specific; GO:0008270,zinc ion binding; GO:…	C2C2-GATA	11.75	13.29	16.01	10.68	10.19	9.91	3.09	2.99	2.56	1.69	2.14	1.92	2.25	1.38	1.6	15.74	13.6	13.62	15.74	12.28	13.88	8.17	7.79	8.44	5.98	5.23	5.63	2.37	3.44	1.95	13.6833	10.26	2.88	1.91667	1.74333	14.32	13.9667	8.13333	5.61333	2.58667
LOC107410147	turquoise	transcription factor TCP7-like	eugene3.00050284	GO:0005634,nucleus; GO:0003677,DNA binding; GO:0003700,DNA-binding transcription factor activity; GO:0006355,regulation of transcription, DNA-templated; GO:0006351,transcription, DNA-templated; GO:0003674,molecular_function; GO:0003676,nucleic acid binding; GO:0005488,binding; GO:0097159,organic cyclic compound binding; GO:1901363,heterocyclic compound binding; GO:0140110,transcription regulator …	TCP	7.87	5.15	9.74	11.29	13.63	12.31	2.46	2.31	1.86	1.26	1.96	1.76	3.08	3.3	3.16	26.5	26.55	29.87	27.91	24.67	29.02	9.4	7.58	8.18	3.09	3.78	2.71	1	0.93	0.7	7.58667	12.41	2.21	1.66	3.18	27.64	27.2	8.38667	3.19333	0.876667
LOC107410531	brown	histone deacetylase HDT1-like	grail3.0001016501	GO:0005730,nucleolus; GO:0016787,hydrolase activity; GO:0046872,metal ion binding; GO:0003676,nucleic acid binding; GO:0016569,covalent chromatin modification; GO:0006355,regulation of transcription, DNA-templated; GO:0006351,transcription, DNA-templated; GO:0003674,molecular_function; GO:0003824,catalytic activity; GO:0005488,binding; GO:0043167,ion binding; GO:0043169,cation binding; GO:0097159…	C2H2	1163.56	1164.47	1165.94	1465.33	1454.09	1362.22	163.69	168.31	158.3	175.64	156.27	173.61	155.03	165.28	162.34	992.76	915.8	1028.67	888.55	1124.81	931.59	413.16	422.49	458.94	128.52	129.57	129.33	82.91	85.78	87.31	1164.66	1427.21	163.433	168.507	160.883	979.077	981.65	431.53	129.14	85.3333
LOC107410742	turquoise	scarecrow-like protein 3	gw1.I.7200.1	GO:0005634,nucleus; GO:0003700,DNA-binding transcription factor activity; GO:0043565,sequence-specific DNA binding; GO:0000989,NA; GO:0006355,regulation of transcription, DNA-templated; GO:0009739,response to gibberellin; GO:0006351,transcription, DNA-templated; GO:0140110,transcription regulator activity; GO:0003674,molecular_function; GO:0003676,nucleic acid binding; GO:0003677,DNA binding; GO:…	GRAS	53.36	50.48	51.27	40.43	47.85	44.9	5.26	4.61	4.44	9.98	11.42	11.21	7.45	7.51	9.37	60.58	58.14	59.5	58.54	59.12	63.31	21.67	20.19	18.11	5.13	5.04	5.91	11.09	10	11.02	51.7033	44.3933	4.77	10.87	8.11	59.4067	60.3233	19.99	5.36	10.7033
LOC107410860	turquoise	uncharacterized LOC107410860	At2g29660	GO:0003676,nucleic acid binding; GO:0003674,molecular_function; GO:0005488,binding; GO:0097159,organic cyclic compound binding; GO:1901363,heterocyclic compound binding	C2H2	6.09	5.44	5.22	4.71	4.83	5.37	1.26	0.94	0.86	0.99	1.02	0.64	1.62	1.1	2.02	11.83	11.11	12.75	10.76	10.27	11.05	2.56	2.89	2.43	2.37	1.38	1.92	1.59	1.5	1.54	5.58333	4.97	1.02	0.883333	1.58	11.8967	10.6933	2.62667	1.89	1.54333
LOC107411030	turquoise	scarecrow-like protein 14	#N/A	GO:0005829,cytosol; GO:0005634,nucleus; GO:0003700,DNA-binding transcription factor activity; GO:0043565,sequence-specific DNA binding; GO:0045893,positive regulation of transcription, DNA-templated; GO:0006355,regulation of transcription, DNA-templated; GO:0009410,response to xenobiotic stimulus; GO:0006351,transcription, DNA-templated; GO:0140110,transcription regulator activity; GO:0003674,mol…	GRAS	11.27	11.84	12.87	23.12	22.03	23.49	5.68	5.39	5.79	7.63	8.44	7.05	6.4	7.35	8.15	33.07	33.27	29.86	22.32	21.43	22.87	29.56	25.75	25.72	19.82	18.56	17.76	7.08	7.54	7.37	11.9933	22.88	5.62	7.70667	7.3	32.0667	22.2067	27.01	18.7133	7.33
LOC107411041	turquoise	scarecrow-like protein 11	At1g07530	GO:0005829,cytosol; GO:0005634,nucleus; GO:0003700,DNA-binding transcription factor activity; GO:0043565,sequence-specific DNA binding; GO:0045893,positive regulation of transcription, DNA-templated; GO:0006355,regulation of transcription, DNA-templated; GO:0009410,response to xenobiotic stimulus; GO:0006351,transcription, DNA-templated; GO:0140110,transcription regulator activity; GO:0003674,mol…	GRAS	0.78	0.85	0.65	0.97	0.92	1.33	0.09	0.13	0.14	0.23	0.46	0.44	0.15	0.17	0.23	1.69	1.47	1.03	1.33	1.27	1.83	0.87	0.66	0.59	0.71	0.82	0.68	0.13	0.19	0.28	0.76	1.07333	0.12	0.376667	0.183333	1.39667	1.47667	0.706667	0.736667	0.2
LOC107411289	turquoise	floral homeotic protein APETALA 2	At2g28550	GO:0005634,nucleus; GO:0003677,DNA binding; GO:0003700,DNA-binding transcription factor activity; GO:0030154,cell differentiation; GO:0009908,flower development; GO:0010073,meristem maintenance; GO:0048481,plant ovule development; GO:0048316,seed development; GO:0010093,specification of floral organ identity; GO:0006351,transcription, DNA-templated; GO:0003674,molecular_function; GO:0003676,nucle…	AP2/ERF-ERF	8.57	9.5	8.9	9.9	13.29	11.19	3.86	4.46	3.59	3.37	4.77	4.84	2.68	2.75	3.43	20.07	21.37	23.04	23.36	22.46	25.78	19.09	15.64	16.63	7	7.3	6.61	3.57	4.32	3.74	8.99	11.46	3.97	4.32667	2.95333	21.4933	23.8667	17.12	6.97	3.87667
LOC107411360	turquoise	GATA transcription factor 11-like	#N/A	GO:0005634,nucleus; GO:0005667,transcription factor complex; GO:0003682,chromatin binding; GO:0003700,DNA-binding transcription factor activity; GO:0000977,RNA polymerase II regulatory region sequence-specific DNA binding; GO:0001085,RNA polymerase II transcription factor binding; GO:0001228,DNA-binding transcription activator activity, RNA polymerase II-specific; GO:0008270,zinc ion binding; GO:…	C2C2-GATA	10.89	11.8	11.11	6.05	7.98	7.18	1.41	1.59	1.24	1.78	1.62	1.31	1.21	2.18	1.25	15.32	16.06	16.93	16.29	19.65	17.98	2.48	1.84	2.38	0.89	1.23	1.41	0.62	0.37	0.5	11.2667	7.07	1.41333	1.57	1.54667	16.1033	17.9733	2.23333	1.17667	0.496667
LOC107411572	turquoise	transcription factor RF2b-like	At2g40620	GO:0005634,nucleus; GO:0003677,DNA binding; GO:0003700,DNA-binding transcription factor activity; GO:0006351,transcription, DNA-templated; GO:0003674,molecular_function; GO:0003676,nucleic acid binding; GO:0005488,binding; GO:0097159,organic cyclic compound binding; GO:1901363,heterocyclic compound binding; GO:0140110,transcription regulator activity; GO:0008152,metabolic process; GO:0006139,nucl…	bZIP	23.07	24.11	23.64	16.46	16.23	18.28	1.57	1.4	1.89	1.47	1.71	1.66	1.9	1.45	1.57	20.73	19.58	18.49	25.36	24.29	25.17	8.75	7.42	8.05	2.85	2.22	2.02	0.63	0.87	0.42	23.6067	16.99	1.62	1.61333	1.64	19.6	24.94	8.07333	2.36333	0.64
LOC107411595	turquoise	pathogenesis-related genes transcriptional activator PTI6-like	#N/A	GO:0005634,nucleus; GO:0003677,DNA binding; GO:0003700,DNA-binding transcription factor activity; GO:0006952,defense response; GO:0006351,transcription, DNA-templated; GO:0003674,molecular_function; GO:0003676,nucleic acid binding; GO:0005488,binding; GO:0097159,organic cyclic compound binding; GO:1901363,heterocyclic compound binding; GO:0140110,transcription regulator activity; GO:0006950,respo…	AP2/ERF-ERF	85.92	76.71	85.29	78.58	77.09	75.6	5.79	4.98	4.31	3.95	5.45	3.45	3.95	4.65	4.41	85.03	83.22	86.29	85.83	66.88	77.46	21.69	19.96	20.9	16.02	17.58	16.53	3.45	4	4.36	82.64	77.09	5.02667	4.28333	4.33667	84.8467	76.7233	20.85	16.71	3.93667
LOC107412017	turquoise	auxin response factor 3	Pt-ETT.1	GO:0005634,nucleus; GO:0003677,DNA binding; GO:0003700,DNA-binding transcription factor activity; GO:0010158,abaxial cell fate specification; GO:0009850,auxin metabolic process; GO:0009734,auxin-activated signaling pathway; GO:0010582,floral meristem determinacy; GO:0009733,response to auxin; GO:0006351,transcription, DNA-templated; GO:0010050,vegetative phase change; GO:0003674,molecular_functio…	B3-ARF	44.23	44.89	41.52	49.38	47.86	52.58	17.19	15.55	17.92	17.62	20.33	18.66	17.31	17.4	15.83	66.94	69.24	66.08	71.93	69.11	74.22	32.6	33.31	34.08	13.88	15.86	15.29	8.93	8.6	9.3	43.5467	49.94	16.8867	18.87	16.8467	67.42	71.7533	33.33	15.01	8.94333
LOC107412162	turquoise	auxin-induced protein 22D-like	#N/A	GO:0005634,nucleus; GO:0009734,auxin-activated signaling pathway; GO:0006355,regulation of transcription, DNA-templated; GO:0006351,transcription, DNA-templated; GO:0007165,signal transduction; GO:0007154,cell communication; GO:0008150,biological_process; GO:0009719,response to endogenous stimulus; GO:0009725,response to hormone; GO:0009733,response to auxin; GO:0009755,hormone-mediated signaling…	AUX/IAA	8.57	9.17	10.41	8.82	8.59	8.06	1.1	1.6	1.15	1.38	2.02	1.77	1.7	2.72	2.26	11.6	9.62	12.34	8.87	7.88	8.31	4.25	5.52	3.89	2.68	3.64	2.96	6.97	5.96	5.89	9.38333	8.49	1.28333	1.72333	2.22667	11.1867	8.35333	4.55333	3.09333	6.27333
LOC107412229	turquoise	auxin-responsive protein IAA16	At3g04730	GO:0005634,nucleus; GO:0003700,DNA-binding transcription factor activity; GO:0009734,auxin-activated signaling pathway; GO:0009733,response to auxin; GO:0006351,transcription, DNA-templated; GO:0140110,transcription regulator activity; GO:0003674,molecular_function; GO:0007165,signal transduction; GO:0007154,cell communication; GO:0008150,biological_process; GO:0009719,response to endogenous stim…	AUX/IAA	41.13	38.03	39.43	35.43	36.9	34.75	9.88	8.92	8.48	11.58	11.86	11.43	11.07	10.21	10.23	53.82	51.67	55.15	53.72	51.59	48.99	14.2	13.61	13.68	7.77	7.02	7.05	6.26	6.93	5.79	39.53	35.6933	9.09333	11.6233	10.5033	53.5467	51.4333	13.83	7.28	6.32667
LOC107412271	brown	probable transcription factor At3g04930	fgenesh4_pg.C_LG_I001884	GO:0043565,sequence-specific DNA binding; GO:0006355,regulation of transcription, DNA-templated; GO:0006351,transcription, DNA-templated; GO:0003674,molecular_function; GO:0003676,nucleic acid binding; GO:0003677,DNA binding; GO:0005488,binding; GO:0097159,organic cyclic compound binding; GO:1901363,heterocyclic compound binding; GO:0008152,metabolic process; GO:0006139,nucleobase-containing comp…	GeBP	16.88	15.21	14.75	14.91	16.08	13.65	46.8	46.27	47.66	27.39	28.29	31.57	52.46	51.16	51.61	14.27	15.11	16.12	14.04	12.26	12.49	24.18	23.71	22.26	54.88	60.38	57.99	58.61	60.34	60.85	15.6133	14.88	46.91	29.0833	51.7433	15.1667	12.93	23.3833	57.75	59.9333
LOC107412353	turquoise	BES1/BZR1 homolog protein 4	At1g78700	GO:0003677,DNA binding; GO:0003700,DNA-binding transcription factor activity; GO:0009742,brassinosteroid mediated signaling pathway; GO:0006355,regulation of transcription, DNA-templated; GO:0006351,transcription, DNA-templated; GO:0003674,molecular_function; GO:0003676,nucleic acid binding; GO:0005488,binding; GO:0097159,organic cyclic compound binding; GO:1901363,heterocyclic compound binding; …	BES1	3.42	3.11	3.12	2.39	2.71	2.49	1.09	1.5	1.11	1.26	1.74	1.42	0.78	0.74	0.63	7.77	8.57	9.42	9.64	9.16	10.22	0.87	1.26	1.26	1.73	1.46	1.14	0.65	0.92	0.84	3.21667	2.53	1.23333	1.47333	0.716667	8.58667	9.67333	1.13	1.44333	0.803333
LOC107412506	turquoise	protein FAR1-RELATED SEQUENCE 5-like	eugene3.00002445	GO:0005634,nucleus; GO:0008270,zinc ion binding; GO:0006355,regulation of transcription, DNA-templated; GO:0003674,molecular_function; GO:0005488,binding; GO:0046872,metal ion binding; GO:0043167,ion binding; GO:0043169,cation binding; GO:0046914,transition metal ion binding; GO:0008152,metabolic process; GO:0006139,nucleobase-containing compound metabolic process; GO:0006351,transcription, DNA-t…	FAR1	2.24	2.24	2.29	1.61	2.13	1.8	0.6	0.39	0.35	1.03	1.71	1.29	0.32	0.35	0.63	3.56	3.32	2.84	3.19	3.03	2.93	1.65	1.85	1.87	1.46	1.39	1.18	0.6	0.76	0.78	2.25667	1.84667	0.446667	1.34333	0.433333	3.24	3.05	1.79	1.34333	0.713333
LOC107412508	turquoise	WRKY transcription factor SUSIBA2-like	gw1.I.6301.1	GO:0005634,nucleus; GO:0003700,DNA-binding transcription factor activity; GO:0043565,sequence-specific DNA binding; GO:0045893,positive regulation of transcription, DNA-templated; GO:0009961,response to 1-aminocyclopropane-1-carboxylic acid; GO:0009611,response to wounding; GO:0006351,transcription, DNA-templated; GO:0140110,transcription regulator activity; GO:0003674,molecular_function; GO:0003…	WRKY	19.52	20.28	21	17.98	14.25	17.72	3.78	3.24	3.87	3.6	3.85	3.69	2.63	3.05	3.44	20.93	21.86	18.82	20.74	20.47	21.75	8.33	8.95	8.19	3.66	3.13	4.46	2.3	2.67	2.49	20.2667	16.65	3.63	3.71333	3.04	20.5367	20.9867	8.49	3.75	2.48667
LOC107412561	blue	protein TIFY 5A-like	#N/A	GO:0005634,nucleus; GO:0003714,transcription corepressor activity; GO:0006952,defense response; GO:1903507,negative regulation of nucleic acid-templated transcription; GO:0031347,regulation of defense response; GO:2000022,regulation of jasmonic acid mediated signaling pathway; GO:0006355,regulation of transcription, DNA-templated; GO:0009611,response to wounding; GO:0006351,transcription, DNA-tem…	Tify	141.52	137.03	130.76	31.32	28.01	24.55	1.31	0.52	0.75	0.72	0.79	0.41	0.67	0.26	0.43	71.2	73.54	67.76	51.86	53.9	60.83	0.77	1.33	0.98	1.85	1.66	2.09	2.69	1.44	3.18	136.437	27.96	0.86	0.64	0.453333	70.8333	55.53	1.02667	1.86667	2.43667
LOC107412865	turquoise	ethylene-responsive transcription factor WRI1	At1g16060	GO:0005634,nucleus; GO:0003677,DNA binding; GO:0003700,DNA-binding transcription factor activity; GO:0009873,ethylene-activated signaling pathway; GO:0008610,lipid biosynthetic process; GO:0006629,lipid metabolic process; GO:0007275,multicellular organism development; GO:1901959,positive regulation of cutin biosynthetic process; GO:0006109,regulation of carbohydrate metabolic process; GO:0006110,…	AP2/ERF-AP2	5.6	5.31	6.47	4.16	4.42	5.01	63.29	61.58	66.09	79.41	90.15	88.53	38.2	44.82	38.05	2.87	1.99	2.96	1.1	1.48	2.14	85.5	73.71	76.13	84.49	85.24	83.82	60.53	58.6	70.04	5.79333	4.53	63.6533	86.03	40.3567	2.60667	1.57333	78.4467	84.5167	63.0567
LOC107413584	turquoise	fructose-bisphosphate aldolase-lysine N-methyltransferase, chloroplastic	At3g55080	GO:0009507,chloroplast; GO:0030785,[ribulose-bisphosphate carboxylase]-lysine N-methyltransferase activity; GO:0003674,molecular_function; GO:0003824,catalytic activity; GO:0008168,methyltransferase activity; GO:0008757,S-adenosylmethionine-dependent methyltransferase activity; GO:0016740,transferase activity; GO:0016741,transferase activity, transferring one-carbon groups; GO:0005622,intracellul…	SET	3.31	2.59	3.64	4.38	2.44	3.36	0.19	0.24	0.27	0.52	0.59	0.62	0.2	0.34	0.34	4.92	4.11	3.73	5.38	4.28	3.78	0.51	0.59	0.84	0.24	0.38	0.36	0.17	0.15	0.17	3.18	3.39333	0.233333	0.576667	0.293333	4.25333	4.48	0.646667	0.326667	0.163333
LOC107413711	turquoise	high mobility group B protein 14	#N/A	GO:0005634,nucleus; GO:0003677,DNA binding; GO:0003700,DNA-binding transcription factor activity; GO:0003674,molecular_function; GO:0003676,nucleic acid binding; GO:0005488,binding; GO:0097159,organic cyclic compound binding; GO:1901363,heterocyclic compound binding; GO:0140110,transcription regulator activity; GO:0005622,intracellular; GO:0005575,cellular_component; GO:0005623,cell; GO:0043231,i…	HMG	24.17	28.22	28.93	27.18	26.93	26.05	6.75	7.76	7.94	13.29	12.45	13.07	7.61	9.44	8.3	44.28	40.05	40.1	39.94	41.56	40.33	21.25	25.8	26.48	23.27	19.88	22.47	17.58	16.92	17.74	27.1067	26.72	7.48333	12.9367	8.45	41.4767	40.61	24.51	21.8733	17.4133
LOC107413857	brown	high mobility group B protein 1-like	#N/A	GO:0005634,nucleus; GO:0003677,DNA binding; GO:0003674,molecular_function; GO:0003676,nucleic acid binding; GO:0005488,binding; GO:0097159,organic cyclic compound binding; GO:1901363,heterocyclic compound binding; GO:0005622,intracellular; GO:0005575,cellular_component; GO:0005623,cell; GO:0043231,intracellular membrane-bounded organelle; GO:0043226,organelle; GO:0043227,membrane-bounded organell…	HMG	178.92	181.1	163.04	147.02	155.58	135.52	47.35	39.22	40.74	52.25	45.03	48.26	35.33	38.56	44.21	165.71	167.59	169.72	174.96	180.48	161.99	157.77	168.87	155.09	93.24	95.17	94.79	85.12	76.91	72.56	174.353	146.04	42.4367	48.5133	39.3667	167.673	172.477	160.577	94.4	78.1967
LOC107413944	brown	dehydration-responsive element-binding protein 2C-like	#N/A	GO:0005634,nucleus; GO:0003700,DNA-binding transcription factor activity; GO:0043565,sequence-specific DNA binding; GO:0044212,transcription regulatory region DNA binding; GO:0010286,heat acclimation; GO:0045893,positive regulation of transcription, DNA-templated; GO:0009408,response to heat; GO:0042542,response to hydrogen peroxide; GO:0010224,response to UV-B; GO:0009414,response to water depri…	AP2/ERF-ERF	6.55	6.07	6.73	7.33	6.07	7.09	23.45	22.51	23.39	14.4	12.29	12.29	19.48	18.37	19.05	6.17	5.67	5.85	5.82	5.6	5.61	11.34	9.38	11.55	19.15	19.54	20.06	17.14	16.65	17.52	6.45	6.83	23.1167	12.9933	18.9667	5.89667	5.67667	10.7567	19.5833	17.1033
LOC107414049	red	transcription elongation factor TFIIS	eugene3.00060955	GO:0005634,nucleus; GO:0003746,translation elongation factor activity; GO:0008270,zinc ion binding; GO:0009910,negative regulation of flower development; GO:0034243,regulation of transcription elongation from RNA polymerase II promoter; GO:0009739,response to gibberellin; GO:0010162,seed dormancy process; GO:0009845,seed germination; GO:0006351,transcription, DNA-templated; GO:0003674,molecular_f…	IWS1	40.01	41.3	43.65	32.61	35.18	26.95	67.7	69.14	63.64	66.91	74.07	68.92	67.77	70.49	62.65	26.67	28.74	29.01	25.68	25.28	25.83	27.82	33.77	29.05	37.25	37.29	35.14	54.43	51.55	50.25	41.6533	31.58	66.8267	69.9667	66.97	28.14	25.5967	30.2133	36.56	52.0767
LOC107414181	brown	probable WRKY transcription factor 31	Pt-WRKY47.2	GO:0005634,nucleus; GO:0003700,DNA-binding transcription factor activity; GO:0043565,sequence-specific DNA binding; GO:0044212,transcription regulatory region DNA binding; GO:0080169,cellular response to boron-containing substance deprivation; GO:0016036,cellular response to phosphate starvation; GO:0009873,ethylene-activated signaling pathway; GO:0045892,negative regulation of transcription, DNA…	WRKY	1.47	1.75	1.29	0.34	0.44	0.39	10.51	11.13	11.72	12.5	12.94	9.95	10.27	11.51	10.68	0.33	0.31	0.23	0.13	0.09	0.05	0.41	0.59	0.43	5.32	5.74	6.6	10.92	11.28	12.54	1.50333	0.39	11.12	11.7967	10.82	0.29	0.09	0.476667	5.88667	11.58
LOC107414299	turquoise	SH2 domain-containing protein A-like	At1g78540	GO:0005634,nucleus; GO:0003700,DNA-binding transcription factor activity; GO:0004871,NA; GO:0140110,transcription regulator activity; GO:0003674,molecular_function; GO:0005622,intracellular; GO:0005575,cellular_component; GO:0005623,cell; GO:0043231,intracellular membrane-bounded organelle; GO:0043226,organelle; GO:0043227,membrane-bounded organelle; GO:0043229,intracellular organelle; GO:0044424…	STAT	7.52	7.64	6.35	6.29	5.56	6.6	2.4	2.83	2.59	3.06	2.74	2.66	2.09	2.26	1.99	7.01	7.65	7.26	7.91	8.5	9.8	7.25	7.81	8.1	3.69	4	4.66	3.33	3.31	4.03	7.17	6.15	2.60667	2.82	2.11333	7.30667	8.73667	7.72	4.11667	3.55667
LOC107414789	turquoise	uncharacterized LOC107414789	At4g00990	GO:0000785,chromatin; GO:0005634,nucleus; GO:0051213,dioxygenase activity; GO:0032454,histone demethylase activity (H3-K9 specific); GO:0046872,metal ion binding; GO:0000976,transcription regulatory region sequence-specific DNA binding; GO:0060969,negative regulation of gene silencing; GO:0006355,regulation of transcription, DNA-templated; GO:0006351,transcription, DNA-templated; GO:0003674,molec…	Jumonji	8.84	10.51	8.8	7.74	5.2	7.91	1.48	1.47	1.96	2.66	2.82	3.23	1.46	1.33	1.81	13.44	14.42	11.92	16.13	12.2	14.62	4.88	4.92	4.81	1.59	1.79	2.03	1.24	1.33	1.36	9.38333	6.95	1.63667	2.90333	1.53333	13.26	14.3167	4.87	1.80333	1.31
LOC107414848	brown	transcription factor MYB41-like	#N/A	GO:0005737,cytoplasm; GO:0005634,nucleus; GO:0003700,DNA-binding transcription factor activity; GO:0000981,DNA-binding transcription factor activity, RNA polymerase II-specific; GO:0043565,sequence-specific DNA binding; GO:0001135,RNA polymerase II transcription regulator recruiting activity; GO:0044212,transcription regulatory region DNA binding; GO:0030154,cell differentiation; GO:0071365,cellu…	MYB	0	0	0.18	1.55	1.26	1.67	16.02	13.07	14.93	7.41	9.36	7.72	14.05	18.31	17.91	0	0.04	0.04	0	0	0	11.46	10.69	10.55	14.44	14.06	18.56	17.14	19.58	17.13	0.06	1.49333	14.6733	8.16333	16.7567	0.0266667	0	10.9	15.6867	17.95
LOC107414874	brown	protein FAR1-RELATED SEQUENCE 4	At1g76320	GO:0005634,nucleus; GO:0003700,DNA-binding transcription factor activity; GO:0008270,zinc ion binding; GO:0010018,far-red light signaling pathway; GO:0042753,positive regulation of circadian rhythm; GO:0045893,positive regulation of transcription, DNA-templated; GO:0009585,red, far-red light phototransduction; GO:0140110,transcription regulator activity; GO:0003674,molecular_function; GO:0005488,…	FAR1	12.25	13.03	12.33	14.77	13.41	14.39	24.19	25.49	26.21	20.97	20.17	20.03	25.61	27.01	26.66	13.46	13.4	13.38	12.92	13.19	14.58	20.51	19.22	19.72	22.02	23.52	24.33	31.01	31.75	29.6	12.5367	14.19	25.2967	20.39	26.4267	13.4133	13.5633	19.8167	23.29	30.7867
LOC107414947	brown	B3 domain-containing transcription factor VRN1-like	#N/A	GO:0005654,nucleoplasm; GO:0003677,DNA binding; GO:0043565,sequence-specific DNA binding; GO:0009909,regulation of flower development; GO:0006355,regulation of transcription, DNA-templated; GO:0006351,transcription, DNA-templated; GO:0010048,vernalization response; GO:0003674,molecular_function; GO:0003676,nucleic acid binding; GO:0005488,binding; GO:0097159,organic cyclic compound binding; GO:19…	B3	9.14	8.24	9.32	7.74	7.52	8.57	0.36	0.57	0.5	1.22	0.69	0.56	0.46	0.66	0.5	8.03	7.92	8.2	7.25	9.63	7.72	3.11	2.91	2.84	0.82	0.65	0.83	0.51	0.54	0.23	8.9	7.94333	0.476667	0.823333	0.54	8.05	8.2	2.95333	0.766667	0.426667
LOC107415354	brown	uncharacterized LOC107415354	At3g48050	GO:0005634,nucleus; GO:0003682,chromatin binding; GO:0003674,molecular_function; GO:0005488,binding; GO:0005622,intracellular; GO:0005575,cellular_component; GO:0005623,cell; GO:0043231,intracellular membrane-bounded organelle; GO:0043226,organelle; GO:0043227,membrane-bounded organelle; GO:0043229,intracellular organelle; GO:0044424,intracellular part; GO:0044464,cell part	IWS1	36.71	40.74	41.12	39.45	32.26	42.42	122.91	123.44	134.25	120.05	125.44	122.28	141.35	141.67	142.99	46.35	49.25	46.09	49.48	40.3	48.44	100.67	95.79	100.14	160.82	169.06	155.48	123.18	147.01	151.07	39.5233	38.0433	126.867	122.59	142.003	47.23	46.0733	98.8667	161.787	140.42
LOC107415525	turquoise	transcription factor PRE6	#N/A	GO:0005737,cytoplasm; GO:0005634,nucleus; GO:0046983,protein dimerization activity; GO:0040008,regulation of growth; GO:0006355,regulation of transcription, DNA-templated; GO:0009416,response to light stimulus; GO:0006351,transcription, DNA-templated; GO:0005515,protein binding; GO:0003674,molecular_function; GO:0005488,binding; GO:0040007,growth; GO:0008150,biological_process; GO:0050789,regulat…	bHLH	3.66	3.5	4.01	26.93	28.47	28.23	49.73	66.08	54.5	70.73	83.19	85.92	46.42	60.58	56.23	2.24	1.95	2.48	2.95	2.35	2.47	141.25	159.98	160.2	117.75	96.72	115.52	23.34	18.98	17.38	3.72333	27.8767	56.77	79.9467	54.41	2.22333	2.59	153.81	109.997	19.9
LOC107415613	blue	zinc-finger homeodomain protein 9	At3g28920	GO:0005634,nucleus; GO:0003677,DNA binding; GO:0046872,metal ion binding; GO:0042803,protein homodimerization activity; GO:0043565,sequence-specific DNA binding; GO:0044212,transcription regulatory region DNA binding; GO:0019760,glucosinolate metabolic process; GO:0006355,regulation of transcription, DNA-templated; GO:0006351,transcription, DNA-templated; GO:0003674,molecular_function; GO:0003676…	zf-HD	42.9	40.41	46.19	34.35	38.9	34.29	11.64	10.98	11.2	9.02	9.81	10.63	12.94	11.35	11.6	31.5	33.42	33.58	32.76	27.25	32.49	23.21	25.62	23.45	14.13	15.63	13.49	9.33	9.9	9.34	43.1667	35.8467	11.2733	9.82	11.9633	32.8333	30.8333	24.0933	14.4167	9.52333
LOC107416076	turquoise	uncharacterized LOC107416076	estExt_Genewise1_v1.C_LG_II2106	--	PLATZ	1.13	1.23	0.82	3.33	3.93	3.35	5.32	4.4	3.19	9.33	9.15	8.31	1.96	2.42	3.05	0.28	0.37	0.19	0.04	0.06	0.09	4.47	4.54	4.2	7.3	7.53	8.43	5.55	5.74	4.84	1.06	3.53667	4.30333	8.93	2.47667	0.28	0.0633333	4.40333	7.75333	5.37667
LOC107416167	brown	zinc finger protein 4-like	At1g66140	GO:0005634,nucleus; GO:0003700,DNA-binding transcription factor activity; GO:0046872,metal ion binding; GO:0043565,sequence-specific DNA binding; GO:0044212,transcription regulatory region DNA binding; GO:0009738,abscisic acid-activated signaling pathway; GO:0019760,glucosinolate metabolic process; GO:0009788,negative regulation of abscisic acid-activated signaling pathway; GO:0006355,regulation …	C2H2	7.36	8.24	7.03	12.12	10.83	11.24	2.09	1.67	2	2.45	1.88	2.35	2.44	1.98	2.98	6.63	6.32	7.66	7.29	6.96	7.65	6.47	6.97	5.3	1.76	1.82	1.54	1.87	2.19	2.42	7.54333	11.3967	1.92	2.22667	2.46667	6.87	7.3	6.24667	1.70667	2.16
LOC107416662	brown	auxin response factor 6-like	Pt-CSARF2.3	GO:0005634,nucleus; GO:0003677,DNA binding; GO:0003700,DNA-binding transcription factor activity; GO:0009734,auxin-activated signaling pathway; GO:0009908,flower development; GO:0009733,response to auxin; GO:0006351,transcription, DNA-templated; GO:0003674,molecular_function; GO:0003676,nucleic acid binding; GO:0005488,binding; GO:0097159,organic cyclic compound binding; GO:1901363,heterocyclic c…	B3-ARF	51.42	53.88	52.71	48.1	39.71	47.02	10.77	11.9	12.04	21.54	21.94	20.95	14.78	14.68	14.67	49.56	49.78	49.9	51.35	45.75	51.31	33.06	31.31	29.71	13.72	14.89	18.3	10.64	12.9	11.81	52.67	44.9433	11.57	21.4767	14.71	49.7467	49.47	31.36	15.6367	11.7833
LOC107416988	blue	N-acetyltransferase 9-like protein	#N/A	GO:0008080,N-acetyltransferase activity; GO:0003674,molecular_function; GO:0003824,catalytic activity; GO:0016407,acetyltransferase activity; GO:0016410,N-acyltransferase activity; GO:0016740,transferase activity; GO:0016746,transferase activity, transferring acyl groups; GO:0016747,transferase activity, transferring acyl groups other than amino-acyl groups	GNAT	9.96	11.01	9.55	7.5	8.8	7.27	1.17	0.96	0.66	1.43	1.43	1.46	0.58	1.04	0.85	7.79	8.06	8.94	6.5	6.79	7.01	4.11	4.3	3.49	1.12	1.57	1.5	0.99	0.82	1.17	10.1733	7.85667	0.93	1.44	0.823333	8.26333	6.76667	3.96667	1.39667	0.993333
LOC107417004	brown	histidine kinase 2-like	At5g35750	GO:0005789,endoplasmic reticulum membrane; GO:0016021,integral component of membrane; GO:0005886,plasma membrane; GO:0009884,cytokinin receptor activity; GO:0042802,identical protein binding; GO:0019900,kinase binding; GO:0000155,phosphorelay sensor kinase activity; GO:0004673,protein histidine kinase activity; GO:0043424,protein histidine kinase binding; GO:0071215,cellular response to abscisic …	Others	0.6	0.78	0.6	0.67	0.35	0.6	0.11	0.2	0.13	0.17	0.18	0.27	0.06	0.13	0.11	0.72	0.91	0.52	0.76	0.86	1.06	0.39	0.39	0.37	0.16	0.15	0.56	0.11	0.08	0.42	0.66	0.54	0.146667	0.206667	0.1	0.716667	0.893333	0.383333	0.29	0.203333
LOC107417059	blue	histone-lysine N-methyltransferase ATXR2	SDG943	GO:0005634,nucleus; GO:0018024,histone-lysine N-methyltransferase activity; GO:0046872,metal ion binding; GO:0003674,molecular_function; GO:0003824,catalytic activity; GO:0008168,methyltransferase activity; GO:0008170,N-methyltransferase activity; GO:0008276,protein methyltransferase activity; GO:0008757,S-adenosylmethionine-dependent methyltransferase activity; GO:0016278,lysine N-methyltransfer…	SET	20.62	23.05	20.12	20.35	16.85	19.48	2.41	3.15	2.2	5.23	4.32	4.31	1.91	1.98	1.97	14.82	15.18	14.28	14.64	16.78	15.49	9.05	8.18	8.25	4.52	4.39	4.51	2.07	2.06	2.92	21.2633	18.8933	2.58667	4.62	1.95333	14.76	15.6367	8.49333	4.47333	2.35
LOC107417234	red	transcription factor bHLH30-like	fgenesh4_pg.C_LG_VIII001032	GO:0005634,nucleus; GO:0003677,DNA binding; GO:0003700,DNA-binding transcription factor activity; GO:0046983,protein dimerization activity; GO:0006355,regulation of transcription, DNA-templated; GO:0006351,transcription, DNA-templated; GO:0003674,molecular_function; GO:0003676,nucleic acid binding; GO:0005488,binding; GO:0097159,organic cyclic compound binding; GO:1901363,heterocyclic compound bi…	bHLH	0.17	0.26	0.13	0.28	0.32	0.12	0.65	1.28	0.83	0.53	0.38	0.67	0.3	0.65	0.5	0.75	0.43	0.52	0.06	0.39	0.31	0.37	0.41	0.88	0.36	0.59	0.44	0	0.16	0.09	0.186667	0.24	0.92	0.526667	0.483333	0.566667	0.253333	0.553333	0.463333	0.0833333
LOC107417248	turquoise	uncharacterized LOC107417248	At5g07900	GO:0003690,double-stranded DNA binding; GO:0006355,regulation of transcription, DNA-templated; GO:0003674,molecular_function; GO:0003676,nucleic acid binding; GO:0003677,DNA binding; GO:0005488,binding; GO:0097159,organic cyclic compound binding; GO:1901363,heterocyclic compound binding; GO:0008152,metabolic process; GO:0006139,nucleobase-containing compound metabolic process; GO:0006351,transcri…	mTERF	2.98	3.93	3.12	3.55	3.69	3.27	0.52	1.29	0.81	1.52	0.51	0.94	0.93	1.56	0.66	7.37	5.95	6.75	7.01	7.01	6.27	2.5	2.71	2.46	1.17	1.48	1.37	2.26	1.79	1.57	3.34333	3.50333	0.873333	0.99	1.05	6.69	6.76333	2.55667	1.34	1.87333
LOC107417612	turquoise	nuclear transcription factor Y subunit A-1-like	At5g12840	GO:0016602,CCAAT-binding factor complex; GO:0003677,DNA binding; GO:0003700,DNA-binding transcription factor activity; GO:0009793,embryo development ending in seed dormancy; GO:0055046,microgametogenesis; GO:0048510,regulation of timing of transition from vegetative to reproductive phase; GO:0006355,regulation of transcription, DNA-templated; GO:0048316,seed development; GO:0010262,somatic embryo…	NF-YA	22.81	25.23	21.48	18.25	19.95	19.3	2.42	1.89	1.95	4.04	2.93	4.64	2.03	3.09	2.26	27.65	32.16	32.52	29.69	25.2	26.14	10.45	10.8	12.22	4.55	4.9	3.83	3.78	3.14	2.84	23.1733	19.1667	2.08667	3.87	2.46	30.7767	27.01	11.1567	4.42667	3.25333
LOC107417668	brown	NAC domain-containing protein 83-like	estExt_Genewise1_v1.C_LG_I7833	GO:0005634,nucleus; GO:0003677,DNA binding; GO:0003700,DNA-binding transcription factor activity; GO:0010150,leaf senescence; GO:0045892,negative regulation of transcription, DNA-templated; GO:0009737,response to abscisic acid; GO:0009651,response to salt stress; GO:0006351,transcription, DNA-templated; GO:0016032,viral process; GO:0010089,xylem development; GO:0003674,molecular_function; GO:0003…	NAC	2.49	3.39	3.05	5.33	6.9	5.26	39.61	40.29	37.9	34.27	33.64	36.61	48.23	43.97	37.35	2.44	2.79	18.16	1.94	1.89	1.79	11.14	13.96	11.03	36.99	38.06	36.56	54.39	38.36	49.38	2.97667	5.83	39.2667	34.84	43.1833	7.79667	1.87333	12.0433	37.2033	47.3767
LOC107418186	turquoise	lysine-specific demethylase REF6	#N/A	GO:0005634,nucleus; GO:0051213,dioxygenase activity; GO:0046872,metal ion binding; GO:0003676,nucleic acid binding; GO:0033169,histone H3-K9 demethylation; GO:0048366,leaf development; GO:0035067,negative regulation of histone acetylation; GO:0006355,regulation of transcription, DNA-templated; GO:0009741,response to brassinosteroid; GO:0006351,transcription, DNA-templated; GO:0009826,unidimension…	C2H2	10.92	12.12	10.26	11.67	11.01	13.3	1.77	1.95	1.92	3.79	3.69	3.42	2.08	1.78	1.91	16.51	15.87	15.49	19.79	16.68	18.78	10.71	9.86	10.62	2.47	2.25	1.88	0.92	0.81	0.9	11.1	11.9933	1.88	3.63333	1.92333	15.9567	18.4167	10.3967	2.2	0.876667
LOC107418291	blue	transcription factor MYB61-like	#N/A	GO:0005634,nucleus; GO:0000981,DNA-binding transcription factor activity, RNA polymerase II-specific; GO:0043565,sequence-specific DNA binding; GO:0001135,RNA polymerase II transcription regulator recruiting activity; GO:0044212,transcription regulatory region DNA binding; GO:0030154,cell differentiation; GO:0006357,regulation of transcription by RNA polymerase II; GO:0006351,transcription, DNA-t…	MYB	20.53	19.22	19.17	4.47	4.97	4.65	0.06	0	0.03	0.03	0	0	0	0	0	5.48	5.75	5.46	4.15	4.07	5.32	0.15	0.13	0.08	0.15	0.13	0.06	0.03	0	0.03	19.64	4.69667	0.03	0.01	0	5.56333	4.51333	0.12	0.113333	0.02
LOC107418576	turquoise	homeobox-leucine zipper protein ATHB-14-like	estExt_fgenesh4_pg.C_LG_I2905	GO:0005634,nucleus; GO:0003677,DNA binding; GO:0003700,DNA-binding transcription factor activity; GO:0008289,lipid binding; GO:0009955,adaxial/abaxial pattern specification; GO:0030154,cell differentiation; GO:0009855,determination of bilateral symmetry; GO:0080060,integument development; GO:0010014,meristem initiation; GO:0009944,polarity specification of adaxial/abaxial axis; GO:0010072,primary…	HB-HD-ZIP	1.48	1.65	1.36	1.27	2.08	1.91	0.59	0.36	0.51	0.47	0.61	0.43	0.43	0.58	0.63	4.36	4.16	4.55	5.59	4.62	4.89	1.86	1.81	2.05	1.01	1.07	1.13	0.64	0.84	0.78	1.49667	1.75333	0.486667	0.503333	0.546667	4.35667	5.03333	1.90667	1.07	0.753333
LOC107418912	turquoise	zinc finger protein CONSTANS-LIKE 2-like	estExt_fgenesh4_pm.C_LG_IV0339	GO:0005634,nucleus; GO:0003677,DNA binding; GO:0003700,DNA-binding transcription factor activity; GO:0008270,zinc ion binding; GO:0009658,chloroplast organization; GO:0009909,regulation of flower development; GO:0009416,response to light stimulus; GO:0006351,transcription, DNA-templated; GO:0003674,molecular_function; GO:0003676,nucleic acid binding; GO:0005488,binding; GO:0097159,organic cyclic …	C2C2-CO-like	2.32	2.6	2.65	1.31	1.2	1.66	0.19	0.03	0.1	0.22	0.2	0.13	0.14	0.03	0.06	3.03	2.82	2.74	4.82	3.91	3.62	1.05	1.59	1.16	0.14	0.09	0.21	0.27	0.11	0.17	2.52333	1.39	0.106667	0.183333	0.0766667	2.86333	4.11667	1.26667	0.146667	0.183333
LOC107419077	blue	squamosa promoter-binding-like protein 6	At1g69170	GO:0005634,nucleus; GO:0003677,DNA binding; GO:0003700,DNA-binding transcription factor activity; GO:0046872,metal ion binding; GO:0042742,defense response to bacterium; GO:0010468,regulation of gene expression; GO:0006355,regulation of transcription, DNA-templated; GO:0006351,transcription, DNA-templated; GO:0003674,molecular_function; GO:0003676,nucleic acid binding; GO:0005488,binding; GO:0097…	SBP	14.75	12.63	13.51	4.86	4.85	4.29	0.15	0.23	0.35	0.23	0.4	0.2	0.6	0.09	0.26	10.37	10.87	9.28	8.05	6.88	7.39	1.86	1.63	1.86	0.7	0.64	0.98	0.78	0.91	1.04	13.63	4.66667	0.243333	0.276667	0.316667	10.1733	7.44	1.78333	0.773333	0.91
LOC107419157	turquoise	formin-J-like	fgenesh4_pg.C_LG_IV001213	GO:0005634,nucleus; GO:0003700,DNA-binding transcription factor activity; GO:0046872,metal ion binding; GO:0044212,transcription regulatory region DNA binding; GO:0006355,regulation of transcription, DNA-templated; GO:0006351,transcription, DNA-templated; GO:0140110,transcription regulator activity; GO:0003674,molecular_function; GO:0005488,binding; GO:0043167,ion binding; GO:0043169,cation bindi…	C2H2	1.26	1.29	1.18	0.73	0.59	0.75	0.22	0.15	0.25	0.41	0.27	0.21	0.17	0.05	0.13	1.34	1.21	1.53	2.3	1.53	1.92	0.63	0.76	1.04	0.22	0.34	0.19	0.3	0.14	0.16	1.24333	0.69	0.206667	0.296667	0.116667	1.36	1.91667	0.81	0.25	0.2
LOC107419222	brown	NAC domain-containing protein 100	NAC015	GO:0005634,nucleus; GO:0003677,DNA binding; GO:0003700,DNA-binding transcription factor activity; GO:0006351,transcription, DNA-templated; GO:0003674,molecular_function; GO:0003676,nucleic acid binding; GO:0005488,binding; GO:0097159,organic cyclic compound binding; GO:1901363,heterocyclic compound binding; GO:0140110,transcription regulator activity; GO:0008152,metabolic process; GO:0006139,nucl…	NAC	9.57	10	8.02	12.29	12.89	17.12	53.06	55.17	51	24.23	24.6	24.15	49.34	53.59	52.31	12.22	10.89	11.23	8.99	8.32	8.56	21.36	21.02	21.61	39.07	39.04	41.76	53.4	44.88	53.44	9.19667	14.1	53.0767	24.3267	51.7467	11.4467	8.62333	21.33	39.9567	50.5733
LOC107419280	blue	transcription factor TCP14	fgenesh4_pg.C_scaffold_160000018	GO:0005634,nucleus; GO:0003677,DNA binding; GO:0003700,DNA-binding transcription factor activity; GO:0008283,cell proliferation; GO:0010229,inflorescence development; GO:0031347,regulation of defense response; GO:0010029,regulation of seed germination; GO:0006355,regulation of transcription, DNA-templated; GO:0009737,response to abscisic acid; GO:0009735,response to cytokinin; GO:0009739,response…	TCP	5.53	5.59	5.87	2.99	3.67	3.54	0.36	0.23	0.18	0.21	0.32	0.15	0.43	0.29	0.46	3.41	3.23	3.42	3.93	2.71	3.58	1.37	1.18	0.93	0.69	0.32	0.43	0.44	0.3	0.42	5.66333	3.4	0.256667	0.226667	0.393333	3.35333	3.40667	1.16	0.48	0.386667
LOC107419534	turquoise	NAC domain-containing protein 86	NAC020	GO:0005634,nucleus; GO:0003677,DNA binding; GO:0003700,DNA-binding transcription factor activity; GO:0090603,sieve element differentiation; GO:0090602,sieve element enucleation; GO:0006351,transcription, DNA-templated; GO:0003674,molecular_function; GO:0003676,nucleic acid binding; GO:0005488,binding; GO:0097159,organic cyclic compound binding; GO:1901363,heterocyclic compound binding; GO:0140110…	NAC	0.49	0.41	0.76	0.81	0.37	0.46	0	0	0	0	0	0	0	0	0	0.98	0.35	0.78	0.43	0.84	0.92	0	0.02	0.16	0	0.18	0	0	0	0	0.553333	0.546667	0	0	0	0.703333	0.73	0.06	0.06	0
LOC107419891	turquoise	zinc finger CCCH domain-containing protein 22	eugene3.00180534	GO:0003677,DNA binding; GO:0046872,metal ion binding; GO:0003674,molecular_function; GO:0003676,nucleic acid binding; GO:0005488,binding; GO:0097159,organic cyclic compound binding; GO:1901363,heterocyclic compound binding; GO:0043167,ion binding; GO:0043169,cation binding	C3H	48.67	51.31	50.95	45.22	42.41	45.29	16.19	13.33	15.61	24.55	22.57	22.01	17.78	17.25	18.92	67.08	68.12	71.01	68.95	72.99	68.38	56.87	60.02	60.72	27.76	25.72	23.08	15.94	16.55	18.48	50.31	44.3067	15.0433	23.0433	17.9833	68.7367	70.1067	59.2033	25.52	16.99
LOC107420575	brown	zinc finger protein ZAT10-like	At1g27730	GO:0005634,nucleus; GO:0003700,DNA-binding transcription factor activity; GO:0046872,metal ion binding; GO:0043565,sequence-specific DNA binding; GO:0035264,multicellular organism growth; GO:0045892,negative regulation of transcription, DNA-templated; GO:0010117,photoprotection; GO:0015979,photosynthesis; GO:0009737,response to abscisic acid; GO:0010200,response to chitin; GO:0009409,response to …	C2H2	4.83	4.85	6.17	5.47	5.92	4.73	1.19	1.38	1.16	2.44	1.91	2.61	1.34	1.44	0.89	5.88	5.29	5.52	5.32	4.42	4.26	2.74	2.3	2.29	4.34	4.34	4.25	1.28	0.86	1.56	5.28333	5.37333	1.24333	2.32	1.22333	5.56333	4.66667	2.44333	4.31	1.23333
LOC107420623	blue	zinc finger CCCH domain-containing protein 23	#N/A	GO:0005886,plasma membrane; GO:0003677,DNA binding; GO:0003700,DNA-binding transcription factor activity; GO:0046872,metal ion binding; GO:0006355,regulation of transcription, DNA-templated; GO:0006979,response to oxidative stress; GO:0003674,molecular_function; GO:0003676,nucleic acid binding; GO:0005488,binding; GO:0097159,organic cyclic compound binding; GO:1901363,heterocyclic compound bindin…	C3H	424.55	399.67	466.88	276.59	285	277.78	8.69	9.46	8.94	18.16	19.16	17.96	5.99	5.38	4.38	160.6	160.95	169.92	135.99	122.61	128.14	52.02	51.6	56.49	29.19	28.87	32.31	5.11	5.15	5.18	430.367	279.79	9.03	18.4267	5.25	163.823	128.913	53.37	30.1233	5.14667
LOC107420677	turquoise	dehydration-responsive element-binding protein 3-like	At5g11590	GO:0005634,nucleus; GO:0003700,DNA-binding transcription factor activity; GO:0043565,sequence-specific DNA binding; GO:0009873,ethylene-activated signaling pathway; GO:0045893,positive regulation of transcription, DNA-templated; GO:0006351,transcription, DNA-templated; GO:0140110,transcription regulator activity; GO:0003674,molecular_function; GO:0003676,nucleic acid binding; GO:0003677,DNA bindi…	AP2/ERF-ERF	0.95	0.98	1.2	0.91	1.08	0.89	0	0	0	0	0	0.04	0	0	0	2.08	2.28	2.28	2.35	2.19	2.52	0	0	0.08	0	0	0.04	0.06	0	0	1.04333	0.96	0	0.0133333	0	2.21333	2.35333	0.0266667	0.0133333	0.02
LOC107420692	turquoise	transcription factor MYB3R-1-like	At4g32730	GO:0005634,nucleus; GO:0003700,DNA-binding transcription factor activity; GO:0000981,DNA-binding transcription factor activity, RNA polymerase II-specific; GO:0043565,sequence-specific DNA binding; GO:0003713,transcription coactivator activity; GO:0001135,RNA polymerase II transcription regulator recruiting activity; GO:0044212,transcription regulatory region DNA binding; GO:0030154,cell differen…	MYB	23.83	23.23	23.26	17.55	14.4	18.67	6.44	7.29	7.67	4.05	4.69	4.16	5.51	5.77	5.4	28.77	26.15	23.81	28.85	27.29	29.15	8.19	7.79	8.03	8.64	7.79	7.57	4.94	4.78	4.93	23.44	16.8733	7.13333	4.3	5.56	26.2433	28.43	8.00333	8	4.88333
LOC107420759	turquoise	homeobox-leucine zipper protein ATHB-6-like	estExt_fgenesh4_pm.C_LG_II0461	GO:0005634,nucleus; GO:0003700,DNA-binding transcription factor activity; GO:0043565,sequence-specific DNA binding; GO:0030308,negative regulation of cell growth; GO:0048573,photoperiodism, flowering; GO:0045893,positive regulation of transcription, DNA-templated; GO:0048510,regulation of timing of transition from vegetative to reproductive phase; GO:0009637,response to blue light; GO:0006351,tra…	HB-HD-ZIP	0.21	0.06	0.06	0.64	0.27	0.43	0	0	0	0	0.02	0	0	0	0	1.25	1.07	0.73	0.96	0.86	0.89	0.07	0.08	0.02	0	0.13	0.02	0	0	0.02	0.11	0.446667	0	0.00666667	0	1.01667	0.903333	0.0566667	0.05	0.00666667
LOC107420865	blue	transcription factor MYB44-like	#N/A	GO:0005634,nucleus; GO:0003700,DNA-binding transcription factor activity; GO:0000981,DNA-binding transcription factor activity, RNA polymerase II-specific; GO:0043565,sequence-specific DNA binding; GO:0001135,RNA polymerase II transcription regulator recruiting activity; GO:0044212,transcription regulatory region DNA binding; GO:0009738,abscisic acid-activated signaling pathway; GO:0030154,cell d…	MYB	67.56	66.72	64.68	29.83	33.27	30.47	0.13	0.21	0.08	0.34	0.31	0.35	0.14	0.33	1.09	27.17	26.95	29.48	30.05	32.45	36.47	1.21	1.32	1.44	0.26	0.94	1.16	0.41	0.41	0.27	66.32	31.19	0.14	0.333333	0.52	27.8667	32.99	1.32333	0.786667	0.363333
LOC107421015	turquoise	uncharacterized LOC107421015	#N/A	GO:0003676,nucleic acid binding; GO:0003674,molecular_function; GO:0005488,binding; GO:0097159,organic cyclic compound binding; GO:1901363,heterocyclic compound binding	C2H2	2.83	3.31	2.04	1.24	3.76	3.3	0	0	0	0	0	0	0	0	0	4.46	4.53	3.56	3.9	5.8	4.82	0.07	0.08	0.08	0	0	0	0	0	0	2.72667	2.76667	0	0	0	4.18333	4.84	0.0766667	0	0
LOC107421210	turquoise	ethylene-responsive transcription factor SHINE 2	eugene3.00061852	GO:0005634,nucleus; GO:0003677,DNA binding; GO:0003700,DNA-binding transcription factor activity; GO:0009873,ethylene-activated signaling pathway; GO:0006351,transcription, DNA-templated; GO:0003674,molecular_function; GO:0003676,nucleic acid binding; GO:0005488,binding; GO:0097159,organic cyclic compound binding; GO:1901363,heterocyclic compound binding; GO:0140110,transcription regulator activi…	AP2/ERF-ERF	1.19	1.05	1.3	4.52	6.2	5.05	0	0	0	0.03	0	0	0	0	0	9.86	10.71	12.77	12.9	11.12	10.11	0.61	1.23	0.97	0	0	0	0	0	0	1.18	5.25667	0	0.01	0	11.1133	11.3767	0.936667	0	0
LOC107421290	brown	protein TIFY 8	eugene3.00061785	GO:0005634,nucleus; GO:0003714,transcription corepressor activity; GO:1903507,negative regulation of nucleic acid-templated transcription; GO:0031347,regulation of defense response; GO:2000022,regulation of jasmonic acid mediated signaling pathway; GO:0006355,regulation of transcription, DNA-templated; GO:0009611,response to wounding; GO:0006351,transcription, DNA-templated; GO:0140110,transcript…	Tify	20.71	22.44	19.56	23.81	19.55	22.71	5.11	4.62	3.78	7.22	7.49	7.74	4.27	4.1	4.2	25.22	23.54	23.37	21.62	21.83	22.61	15.16	15.78	15.97	5.23	5.65	4.82	3.07	3.88	3.6	20.9033	22.0233	4.50333	7.48333	4.19	24.0433	22.02	15.6367	5.23333	3.51667
LOC107421401	blue	auxin-responsive protein IAA9-like	Pt-IAA8.4	GO:0005634,nucleus; GO:0003700,DNA-binding transcription factor activity; GO:0043565,sequence-specific DNA binding; GO:0009734,auxin-activated signaling pathway; GO:0009733,response to auxin; GO:0006351,transcription, DNA-templated; GO:0140110,transcription regulator activity; GO:0003674,molecular_function; GO:0003676,nucleic acid binding; GO:0003677,DNA binding; GO:0005488,binding; GO:0097159,or…	AUX/IAA	28.83	31.02	31.61	28.71	27.06	26.44	2.64	2.98	3.95	2.88	2.87	3.41	1.7	2.02	2.05	21.07	21.92	23.08	25.48	29.25	25.94	6.52	5.24	6.39	2.46	2.43	3.86	1.31	1.15	1.02	30.4867	27.4033	3.19	3.05333	1.92333	22.0233	26.89	6.05	2.91667	1.16
LOC107421577	turquoise	ethylene receptor	Pt-ETR1.1	GO:0005789,endoplasmic reticulum membrane; GO:0016021,integral component of membrane; GO:0005524,ATP binding; GO:0051740,ethylene binding; GO:0038199,ethylene receptor activity; GO:0046872,metal ion binding; GO:0000155,phosphorelay sensor kinase activity; GO:0010105,negative regulation of ethylene-activated signaling pathway; GO:0000166,nucleotide binding; GO:0003674,molecular_function; GO:000548…	Others	17.21	16.43	16.61	14.66	14.56	15.43	6.9	7.18	6.66	11.27	11.89	11.2	6.03	6.74	7.53	28.39	28.01	28.63	25.37	25.51	26.57	19.29	17.74	18.55	12.87	12.41	15.38	12.24	10.89	12.01	16.75	14.8833	6.91333	11.4533	6.76667	28.3433	25.8167	18.5267	13.5533	11.7133
LOC107421675	brown	trihelix transcription factor GT-2-like	eugene3.00020637	GO:0005634,nucleus; GO:0003677,DNA binding; GO:0003700,DNA-binding transcription factor activity; GO:0006351,transcription, DNA-templated; GO:0003674,molecular_function; GO:0003676,nucleic acid binding; GO:0005488,binding; GO:0097159,organic cyclic compound binding; GO:1901363,heterocyclic compound binding; GO:0140110,transcription regulator activity; GO:0008152,metabolic process; GO:0006139,nucl…	Trihelix	16.05	17.3	18.48	24.18	22.91	24.55	80.45	79.34	87.81	55.6	58.12	55.79	70.19	67.61	73.39	17.02	18.33	16.94	18.41	16.53	17.04	22.98	22.35	22.76	71.27	73.3	65.07	79.23	88.52	91.45	17.2767	23.88	82.5333	56.5033	70.3967	17.43	17.3267	22.6967	69.88	86.4
LOC107421838	brown	uncharacterized LOC107421838	gw1.VII.700.1	GO:0003677,DNA binding; GO:0003674,molecular_function; GO:0003676,nucleic acid binding; GO:0005488,binding; GO:0097159,organic cyclic compound binding; GO:1901363,heterocyclic compound binding	MYB-related	19.94	18.89	19.88	18.02	16.7	15.05	31.2	31.68	31.53	27	28.27	28.09	28.81	32.21	30.8	16.88	15.22	17.8	16.43	15.3	18.08	23.03	22.56	22.4	30.82	33.36	34.4	31.5	34.18	36.85	19.57	16.59	31.47	27.7867	30.6067	16.6333	16.6033	22.6633	32.86	34.1767
LOC107422215	blue	transcription factor bHLH128	#N/A	GO:0005829,cytosol; GO:0005634,nucleus; GO:0001046,core promoter sequence-specific DNA binding; GO:0003700,DNA-binding transcription factor activity; GO:0046983,protein dimerization activity; GO:0044212,transcription regulatory region DNA binding; GO:0001228,DNA-binding transcription activator activity, RNA polymerase II-specific; GO:0010119,regulation of stomatal movement; GO:0006355,regulation …	bHLH	12.18	10.89	11.86	9.9	10.67	9.16	2.12	1.55	2.12	3.52	3.4	3.46	2.47	2.35	2.89	8.07	7.99	8.08	7.64	6.99	7.42	5.58	4.64	5.31	2.43	2.84	3.3	2.33	1.8	1.43	11.6433	9.91	1.93	3.46	2.57	8.04667	7.35	5.17667	2.85667	1.85333
LOC107422350	turquoise	NAC domain-containing protein 55-like	#N/A	GO:0005634,nucleus; GO:0003677,DNA binding; GO:0003700,DNA-binding transcription factor activity; GO:0009867,jasmonic acid mediated signaling pathway; GO:0009414,response to water deprivation; GO:0006351,transcription, DNA-templated; GO:0003674,molecular_function; GO:0003676,nucleic acid binding; GO:0005488,binding; GO:0097159,organic cyclic compound binding; GO:1901363,heterocyclic compound bind…	NAC	2.13	2.2	2.2	2.55	2.59	3.8	0.2	0.46	0.29	0.53	0.13	0.55	0.26	0.66	0.14	3.91	4.31	4.51	5.67	6.12	5.52	3.1	4.11	3.8	3.65	3.71	2.86	1.59	1.81	1.77	2.17667	2.98	0.316667	0.403333	0.353333	4.24333	5.77	3.67	3.40667	1.72333
LOC107422467	turquoise	auxin-responsive protein IAA13	fgenesh4_pm.C_LG_VIII000731	GO:0005634,nucleus; GO:0003700,DNA-binding transcription factor activity; GO:0009734,auxin-activated signaling pathway; GO:0009733,response to auxin; GO:0006351,transcription, DNA-templated; GO:0140110,transcription regulator activity; GO:0003674,molecular_function; GO:0007165,signal transduction; GO:0007154,cell communication; GO:0008150,biological_process; GO:0009719,response to endogenous stim…	AUX/IAA	2.75	2.73	2.51	4.49	4.2	4.03	0.2	0.47	0.27	0.32	0.73	0.41	0.26	0.38	0.27	4	3.84	3.74	7.44	6.35	5.54	2.57	2.19	2.7	0.2	0.26	0.46	0.13	0.42	0.3	2.66333	4.24	0.313333	0.486667	0.303333	3.86	6.44333	2.48667	0.306667	0.283333
LOC107422693	turquoise	transcription factor TGA3	#N/A	GO:0005634,nucleus; GO:0005516,calmodulin binding; GO:0003700,DNA-binding transcription factor activity; GO:0043565,sequence-specific DNA binding; GO:0042742,defense response to bacterium; GO:0009626,plant-type hypersensitive response; GO:0009862,systemic acquired resistance, salicylic acid mediated signaling pathway; GO:0006351,transcription, DNA-templated; GO:0005515,protein binding; GO:0003674…	bZIP	31.65	32.05	31.83	32.74	29.44	29.09	7.7	7.76	8.11	14.58	15.62	15.56	5.01	4.5	4.67	42.18	43.66	42.98	39.58	40.99	40.93	25.87	24.28	24.47	10.58	12.58	12.15	6.17	6.78	6.82	31.8433	30.4233	7.85667	15.2533	4.72667	42.94	40.5	24.8733	11.77	6.59
LOC107423153	turquoise	protein tesmin/TSO1-like CXC 3	Pt-CPP1.22	GO:0005634,nucleus; GO:0003700,DNA-binding transcription factor activity; GO:0046872,metal ion binding; GO:0043565,sequence-specific DNA binding; GO:0007275,multicellular organism development; GO:0006355,regulation of transcription, DNA-templated; GO:0140110,transcription regulator activity; GO:0003674,molecular_function; GO:0005488,binding; GO:0043167,ion binding; GO:0043169,cation binding; GO:0…	CPP	17.79	21.01	18.55	15	14	14.68	0.83	0.7	0.79	0.48	0.96	0.56	0.43	0.41	0.44	47.63	47.17	48.41	54.54	51.81	57.25	5.07	5.22	4.78	1.48	1.63	1.96	0.53	0.91	1.31	19.1167	14.56	0.773333	0.666667	0.426667	47.7367	54.5333	5.02333	1.69	0.916667
LOC107423753	brown	uncharacterized LOC107423753	At4g25610	GO:0003676,nucleic acid binding; GO:0003674,molecular_function; GO:0005488,binding; GO:0097159,organic cyclic compound binding; GO:1901363,heterocyclic compound binding	C2H2	14.9	15.25	16.39	15.3	14.05	14.12	30.88	33.95	31.96	23.06	24.59	24.07	36.3	35.43	32.83	15.8	17.38	16.13	16.85	16.64	17.25	18.12	16.99	17.19	23.01	23.78	22.68	28.87	30.61	30.5	15.5133	14.49	32.2633	23.9067	34.8533	16.4367	16.9133	17.4333	23.1567	29.9933
LOC107424012	greenyellow	uncharacterized LOC107424012	At5g03780	--	MYB-related	1.42	1.24	1.64	1.44	1.67	1.37	0.35	0.46	0.37	1.12	0.95	0.9	0.58	0.57	0.27	0.82	1.05	0.68	0.75	0.97	0.72	0.43	0.91	0.69	0.33	0.3	0.43	0	0.49	0.25	1.43333	1.49333	0.393333	0.99	0.473333	0.85	0.813333	0.676667	0.353333	0.246667
LOC107424027	turquoise	zinc finger CCCH domain-containing protein 20	#N/A	GO:0005886,plasma membrane; GO:0003677,DNA binding; GO:0003700,DNA-binding transcription factor activity; GO:0046872,metal ion binding; GO:0006355,regulation of transcription, DNA-templated; GO:0006979,response to oxidative stress; GO:0003674,molecular_function; GO:0003676,nucleic acid binding; GO:0005488,binding; GO:0097159,organic cyclic compound binding; GO:1901363,heterocyclic compound bindin…	C3H	23.19	23.17	28.7	23.93	23.79	23.47	8.82	10.83	9.85	5.93	5.49	4.82	3.9	4.41	3.69	46.28	46.96	50.57	53.06	44.49	47.72	15.97	17.6	15.55	10.14	9.27	10.53	6.38	5.99	4.65	25.02	23.73	9.83333	5.41333	4	47.9367	48.4233	16.3733	9.98	5.67333
LOC107424132	blue	BTB/POZ domain and ankyrin repeat-containing protein NPR1-like	estExt_fgenesh4_pg.C_LG_VI0944	GO:0005737,cytoplasm; GO:0005634,nucleus; GO:0006952,defense response; GO:0006950,response to stress; GO:0008150,biological_process; GO:0050896,response to stimulus; GO:0005622,intracellular; GO:0005575,cellular_component; GO:0005623,cell; GO:0044424,intracellular part; GO:0044464,cell part; GO:0043231,intracellular membrane-bounded organelle; GO:0043226,organelle; GO:0043227,membrane-bounded org…	TRAF	8.68	8.48	7.95	5.22	5.41	4.86	1.4	1.51	1.39	2.19	2.16	2.05	1.89	1.36	1.38	6.07	5.79	5.28	5.09	5.85	5.55	4.19	3.33	3.96	2.15	2.65	2.78	2.61	2.06	2.36	8.37	5.16333	1.43333	2.13333	1.54333	5.71333	5.49667	3.82667	2.52667	2.34333
LOC107424208	turquoise	squamosa promoter-binding-like protein 8	eugene3.00190655	GO:0005737,cytoplasm; GO:0005634,nucleus; GO:0003677,DNA binding; GO:0046872,metal ion binding; GO:0048653,anther development; GO:0030154,cell differentiation; GO:0009554,megasporogenesis; GO:0009556,microsporogenesis; GO:0006355,regulation of transcription, DNA-templated; GO:0006351,transcription, DNA-templated; GO:0003674,molecular_function; GO:0003676,nucleic acid binding; GO:0005488,binding; …	SBP	10.57	10.57	11.24	5.35	5.93	5.93	0.21	0.04	0.07	0.12	0.14	0	0.04	0.08	0.11	15.86	16.28	15.18	17.85	17.61	18.17	0.43	0.31	0.07	0.24	0.21	0.2	0.05	0.1	0.04	10.7933	5.73667	0.106667	0.0866667	0.0766667	15.7733	17.8767	0.27	0.216667	0.0633333
LOC107424211	turquoise	GATA transcription factor 4	estExt_fgenesh4_pg.C_LG_X2015	GO:0005634,nucleus; GO:0005667,transcription factor complex; GO:0003682,chromatin binding; GO:0003700,DNA-binding transcription factor activity; GO:0000977,RNA polymerase II regulatory region sequence-specific DNA binding; GO:0001085,RNA polymerase II transcription factor binding; GO:0001228,DNA-binding transcription activator activity, RNA polymerase II-specific; GO:0008270,zinc ion binding; GO:…	C2C2-GATA	1.02	1.23	1.33	1.66	1.1	0.73	0.09	0.16	0.15	0.06	0.19	0.1	0.26	0.1	0.03	0.9	0.91	1.18	1.48	1.8	1.63	1.55	1.68	1.9	0.74	1.16	0.73	0.26	0.46	0.31	1.19333	1.16333	0.133333	0.116667	0.13	0.996667	1.63667	1.71	0.876667	0.343333
LOC107424236	turquoise	transcription termination factor MTEF18, mitochondrial	fgenesh4_pg.C_scaffold_40000141	GO:0009507,chloroplast; GO:0005739,mitochondrion; GO:0003690,double-stranded DNA binding; GO:0019843,rRNA binding; GO:0003727,single-stranded RNA binding; GO:0009658,chloroplast organization; GO:0032502,developmental process; GO:0006353,DNA-templated transcription, termination; GO:0007005,mitochondrion organization; GO:0006355,regulation of transcription, DNA-templated; GO:0042255,ribosome assemb…	mTERF	1.57	2.02	2.02	2.27	2.38	2.29	0.45	0.62	0.76	0.9	0.68	0.81	0.53	0.5	0.45	3.4	3.77	3.88	2.79	3.61	3.93	1.9	1.72	1.33	1.08	1.46	1.06	0.37	0.7	0.35	1.87	2.31333	0.61	0.796667	0.493333	3.68333	3.44333	1.65	1.2	0.473333
LOC107424273	brown	protein FAR1-RELATED SEQUENCE 5-like	At4g38180	GO:0005634,nucleus; GO:0008270,zinc ion binding; GO:0006355,regulation of transcription, DNA-templated; GO:0003674,molecular_function; GO:0005488,binding; GO:0046872,metal ion binding; GO:0043167,ion binding; GO:0043169,cation binding; GO:0046914,transition metal ion binding; GO:0008152,metabolic process; GO:0006139,nucleobase-containing compound metabolic process; GO:0006351,transcription, DNA-t…	FAR1	11.45	12	11.99	17.33	16.66	17.36	4.01	3.72	4.28	3.3	3.82	3.45	3.1	4.19	3.03	13.79	14.79	14.44	13.86	14.74	13.36	6.99	7.75	7.73	3.37	3.53	3.24	2.78	1.97	2.52	11.8133	17.1167	4.00333	3.52333	3.44	14.34	13.9867	7.49	3.38	2.42333
LOC107424290	turquoise	squamosa promoter-binding protein 1-like	At3g60030	GO:0005634,nucleus; GO:0003677,DNA binding; GO:0003700,DNA-binding transcription factor activity; GO:0046872,metal ion binding; GO:0006355,regulation of transcription, DNA-templated; GO:0006351,transcription, DNA-templated; GO:0003674,molecular_function; GO:0003676,nucleic acid binding; GO:0005488,binding; GO:0097159,organic cyclic compound binding; GO:1901363,heterocyclic compound binding; GO:01…	SBP	20.56	18.79	19.3	22.08	23.5	23.19	35.72	31.03	31.67	19.43	17.56	21.5	28.57	29.28	30.02	2.5	3.76	1.97	2.13	1.95	1.64	15.5	19.25	15.74	14.36	13.95	15.27	12.58	9.09	11.68	19.55	22.9233	32.8067	19.4967	29.29	2.74333	1.90667	16.83	14.5267	11.1167
LOC107424300	brown	WUSCHEL-related homeobox 13	estExt_fgenesh4_pg.C_LG_II0076	GO:0005634,nucleus; GO:0003677,DNA binding; GO:0003700,DNA-binding transcription factor activity; GO:0007275,multicellular organism development; GO:0006351,transcription, DNA-templated; GO:0003674,molecular_function; GO:0003676,nucleic acid binding; GO:0005488,binding; GO:0097159,organic cyclic compound binding; GO:1901363,heterocyclic compound binding; GO:0140110,transcription regulator activity…	HB-other	17.98	15.18	15.27	21.22	19.9	19.6	2.85	4.31	1.99	4.63	5.53	5.04	5.45	5.66	4.06	22.15	20.2	21.68	22.32	22.58	19.81	10.74	13.86	13.27	5.98	7.18	4.02	1.12	2.74	3.26	16.1433	20.24	3.05	5.06667	5.05667	21.3433	21.57	12.6233	5.72667	2.37333
LOC107424418	turquoise	histidine kinase 1	eugene3.00570069	GO:0016021,integral component of membrane; GO:0005622,intracellular; GO:0005886,plasma membrane; GO:0009927,histidine phosphotransfer kinase activity; GO:0005034,osmosensor activity; GO:0000155,phosphorelay sensor kinase activity; GO:0009738,abscisic acid-activated signaling pathway; GO:0006970,response to osmotic stress; GO:0009414,response to water deprivation; GO:0010431,seed maturation; GO:00…	Others	2.21	2.12	2.01	1.78	1.04	1.65	0.55	0.59	0.63	0.41	0.6	0.55	0.48	0.76	0.49	2.62	2.95	2.73	3.75	2.29	3.12	3.35	2.92	3.01	0.89	1.39	1.38	0.44	0.53	0.86	2.11333	1.49	0.59	0.52	0.576667	2.76667	3.05333	3.09333	1.22	0.61
LOC107424539	brown	ethylene-responsive transcription factor RAP2-10	eugene3.00050503	GO:0005634,nucleus; GO:0003677,DNA binding; GO:0003700,DNA-binding transcription factor activity; GO:0009873,ethylene-activated signaling pathway; GO:0006351,transcription, DNA-templated; GO:0003674,molecular_function; GO:0003676,nucleic acid binding; GO:0005488,binding; GO:0097159,organic cyclic compound binding; GO:1901363,heterocyclic compound binding; GO:0140110,transcription regulator activi…	AP2/ERF-ERF	17.26	16.04	18.73	14.52	15.35	14.92	31.72	32.14	32.53	30.05	33.51	30.03	50.6	51.69	43.86	13.62	14.99	15.26	15.36	17.72	14.58	22.28	25.72	24.81	28.75	29.1	29.6	36.05	35.09	33.56	17.3433	14.93	32.13	31.1967	48.7167	14.6233	15.8867	24.27	29.15	34.9
LOC107424542	brown	ethylene-responsive transcription factor SHINE 3	Pt-AP2.14	GO:0005634,nucleus; GO:0003677,DNA binding; GO:0003700,DNA-binding transcription factor activity; GO:0030154,cell differentiation; GO:0009908,flower development; GO:0010073,meristem maintenance; GO:0048481,plant ovule development; GO:0048316,seed development; GO:0010093,specification of floral organ identity; GO:0006351,transcription, DNA-templated; GO:0003674,molecular_function; GO:0003676,nucle…	AP2/ERF-ERF	87.3	96.68	86.98	122.26	128.92	121.57	369.76	356.64	353.26	238.64	223.78	230.06	364.94	370.86	364.63	73.15	70.03	71.82	68.98	73.73	72.52	181.07	180.89	158.94	296.9	295.29	342.14	441.09	433.02	430.44	90.32	124.25	359.887	230.827	366.81	71.6667	71.7433	173.633	311.443	434.85
LOC107424694	brown	upstream activation factor subunit spp27-like	estExt_Genewise1_v1.C_1300082	GO:0003677,DNA binding; GO:0046872,metal ion binding; GO:0003674,molecular_function; GO:0003676,nucleic acid binding; GO:0005488,binding; GO:0097159,organic cyclic compound binding; GO:1901363,heterocyclic compound binding; GO:0043167,ion binding; GO:0043169,cation binding	SWI/SNF-BAF60b	4.37	4.19	5.76	3.98	4.22	3.77	0.65	0.5	0.48	1.1	1.4	1.08	0.48	0.5	0.42	4.36	4.93	4.89	4.11	4.22	3.65	2.19	3.65	3.4	2.7	2.67	3.24	0.82	1.62	1.18	4.77333	3.99	0.543333	1.19333	0.466667	4.72667	3.99333	3.08	2.87	1.20667
LOC107424734	turquoise	B3 domain-containing protein Os03g0620500-like	#N/A	GO:0005654,nucleoplasm; GO:0003677,DNA binding; GO:0043565,sequence-specific DNA binding; GO:0009909,regulation of flower development; GO:0006355,regulation of transcription, DNA-templated; GO:0006351,transcription, DNA-templated; GO:0010048,vernalization response; GO:0003674,molecular_function; GO:0003676,nucleic acid binding; GO:0005488,binding; GO:0097159,organic cyclic compound binding; GO:19…	B3	2.01	1.59	1.2	3.82	3.45	3.26	0.65	0.6	0.65	0.47	0.26	0.87	0.28	0.28	0.38	7.3	6.57	5.44	6.28	5.8	6.02	0.95	0.79	0.93	0.46	0.57	0.76	0.46	0.1	0.17	1.6	3.51	0.633333	0.533333	0.313333	6.43667	6.03333	0.89	0.596667	0.243333
LOC107424844	brown	protein indeterminate-domain 2	fgenesh4_pg.C_scaffold_57000195	GO:0005634,nucleus; GO:0003700,DNA-binding transcription factor activity; GO:0046872,metal ion binding; GO:0044212,transcription regulatory region DNA binding; GO:0009937,regulation of gibberellic acid mediated signaling pathway; GO:0010029,regulation of seed germination; GO:0006355,regulation of transcription, DNA-templated; GO:0010431,seed maturation; GO:0006351,transcription, DNA-templated; GO…	C2H2	22.42	28.6	24.21	23.77	24.77	23.6	75.69	72.58	70.68	88.66	89.06	91.22	88.65	87.06	87.53	18.69	20.05	19.11	17.61	15.09	17.72	38.85	37.59	38.54	61.26	66.09	67.13	74.9	80.06	82.85	25.0767	24.0467	72.9833	89.6467	87.7467	19.2833	16.8067	38.3267	64.8267	79.27
LOC107424957	turquoise	probable amino-acid acetyltransferase NAGS2, chloroplastic	#N/A	GO:0009507,chloroplast; GO:0004042,acetyl-CoA:L-glutamate N-acetyltransferase activity; GO:0103045,methione N-acyltransferase activity; GO:0006526,arginine biosynthetic process; GO:0003674,molecular_function; GO:0003824,catalytic activity; GO:0008080,N-acetyltransferase activity; GO:0016407,acetyltransferase activity; GO:0016410,N-acyltransferase activity; GO:0016740,transferase activity; GO:0016…	GNAT	36.69	39.53	37.08	44	43.02	42.81	15.52	13.83	13.65	20.3	19.79	21.24	14.99	15.56	16.3	52.52	54.05	54.98	56.71	49.69	55.06	22.98	22.87	21.11	15.91	15.74	14.7	10.31	9.29	9.49	37.7667	43.2767	14.3333	20.4433	15.6167	53.85	53.82	22.32	15.45	9.69667
LOC107425045	brown	methylmalonate-semialdehyde dehydrogenase [acylating], mitochondrial-like	Pt-ALDH6.5	GO:0005739,mitochondrion; GO:0005507,copper ion binding; GO:0004491,methylmalonate-semialdehyde dehydrogenase (acylating) activity; GO:0006979,response to oxidative stress; GO:0003674,molecular_function; GO:0005488,binding; GO:0046872,metal ion binding; GO:0043167,ion binding; GO:0043169,cation binding; GO:0046914,transition metal ion binding; GO:0003824,catalytic activity; GO:0016491,oxidoreduct…	FAR1	7.64	8.08	8.6	6.48	5.25	7.25	1.28	1.23	0.85	3.57	2.91	3.16	1.29	0.96	1.61	10.28	9.36	8.44	9.37	9.18	9.71	5.98	5.57	5.02	3.69	3.48	3.5	2.35	2.69	2.77	8.10667	6.32667	1.12	3.21333	1.28667	9.36	9.42	5.52333	3.55667	2.60333
LOC107425063	turquoise	squamosa promoter-binding protein 1	At3g60030	GO:0005634,nucleus; GO:0003677,DNA binding; GO:0003700,DNA-binding transcription factor activity; GO:0046872,metal ion binding; GO:0009908,flower development; GO:0006351,transcription, DNA-templated; GO:0003674,molecular_function; GO:0003676,nucleic acid binding; GO:0005488,binding; GO:0097159,organic cyclic compound binding; GO:1901363,heterocyclic compound binding; GO:0140110,transcription regu…	SBP	93.79	88.81	92.64	161.17	194.33	163.8	10.54	9.35	10.76	9.29	11.24	11.07	5.32	6.07	6.62	163.38	164.93	171.42	177.93	165.7	167.33	44.33	49.59	52.29	12.09	13.5	14.18	7.38	7.38	7.32	91.7467	173.1	10.2167	10.5333	6.00333	166.577	170.32	48.7367	13.2567	7.36
LOC107425110	turquoise	transcription factor bHLH93-like	estExt_fgenesh4_pg.C_LG_II0987	GO:0005634,nucleus; GO:0003677,DNA binding; GO:0003700,DNA-binding transcription factor activity; GO:0046983,protein dimerization activity; GO:0045487,gibberellin catabolic process; GO:0007275,multicellular organism development; GO:0010371,regulation of gibberellin biosynthetic process; GO:0006351,transcription, DNA-templated; GO:0003674,molecular_function; GO:0003676,nucleic acid binding; GO:000…	bHLH	1.85	1.18	2.03	0.3	0.44	0.66	0	0	0	0	0	0	0	0	0	2.66	3.64	2.8	2.22	4.08	3.34	0.29	0	0.07	0	0.07	0	0	0	0	1.68667	0.466667	0	0	0	3.03333	3.21333	0.12	0.0233333	0
LOC107425151	turquoise	AP2-like ethylene-responsive transcription factor AIL6	At5g10510	GO:0005634,nucleus; GO:0003677,DNA binding; GO:0003700,DNA-binding transcription factor activity; GO:0009873,ethylene-activated signaling pathway; GO:0007275,multicellular organism development; GO:0006351,transcription, DNA-templated; GO:0003674,molecular_function; GO:0003676,nucleic acid binding; GO:0005488,binding; GO:0097159,organic cyclic compound binding; GO:1901363,heterocyclic compound bin…	AP2/ERF-AP2	0.09	0.32	0.13	0.28	0.37	0.39	0	0	0	0	0	0	0	0	0	0.97	0.65	0.76	1.46	0.8	0.71	0.02	0	0.02	0.04	0	0.02	0.02	0	0	0.18	0.346667	0	0	0	0.793333	0.99	0.0133333	0.02	0.00666667
LOC107425259	turquoise	protein indeterminate-domain 7	At1g55110	GO:0003677,DNA binding; GO:0003700,DNA-binding transcription factor activity; GO:0046872,metal ion binding; GO:0006355,regulation of transcription, DNA-templated; GO:0006351,transcription, DNA-templated; GO:0003674,molecular_function; GO:0003676,nucleic acid binding; GO:0005488,binding; GO:0097159,organic cyclic compound binding; GO:1901363,heterocyclic compound binding; GO:0140110,transcription …	C2H2	16.78	18.2	16.28	9.95	7.96	9.35	2.05	1.54	1.63	3.33	3.3	3.19	2.3	2.34	2.27	16.44	16.12	18.11	16.22	16.34	16.01	6.44	6.33	5.78	2.08	2.26	1.98	2.18	1.69	2.44	17.0867	9.08667	1.74	3.27333	2.30333	16.89	16.19	6.18333	2.10667	2.10333
LOC107425282	turquoise	ethylene-responsive transcription factor 4	At3g15210	GO:0005634,nucleus; GO:0003677,DNA binding; GO:0003700,DNA-binding transcription factor activity; GO:0006952,defense response; GO:0009873,ethylene-activated signaling pathway; GO:0006351,transcription, DNA-templated; GO:0003674,molecular_function; GO:0003676,nucleic acid binding; GO:0005488,binding; GO:0097159,organic cyclic compound binding; GO:1901363,heterocyclic compound binding; GO:0140110,t…	AP2/ERF-ERF	93.82	87.01	91.88	65.84	75.55	66.15	6.69	4.95	4.5	4.63	5.52	4.51	3.37	3.88	5.46	93.66	91.84	103.96	113.5	95.84	96.86	32.5	29.95	29.28	55.59	53.98	45.82	5.79	6.01	5.02	90.9033	69.18	5.38	4.88667	4.23667	96.4867	102.067	30.5767	51.7967	5.60667
LOC107425446	brown	SWI/SNF-related matrix-associated actin-dependent regulator of chromatin subfamily A-like protein 1	#N/A	--	SNF2	3.95	4.76	4.46	5.54	5.42	5.7	1.54	1.53	0.94	1	1.08	1.27	1.22	1.41	1.45	5.07	4.86	4.37	4.51	5.13	4.6	2.87	3.86	3.19	2.51	2.76	2.77	1.56	1.65	1.39	4.39	5.55333	1.33667	1.11667	1.36	4.76667	4.74667	3.30667	2.68	1.53333
LOC107425459	turquoise	dof zinc finger protein DOF1.4-like	At1g28310	GO:0005634,nucleus; GO:0003677,DNA binding; GO:0046872,metal ion binding; GO:0006355,regulation of transcription, DNA-templated; GO:0006351,transcription, DNA-templated; GO:0003674,molecular_function; GO:0003676,nucleic acid binding; GO:0005488,binding; GO:0097159,organic cyclic compound binding; GO:1901363,heterocyclic compound binding; GO:0043167,ion binding; GO:0043169,cation binding; GO:00081…	C2C2-Dof	21.28	20.97	21.14	19.9	20.73	21.17	7.73	6.18	6.85	8.46	8.12	7.53	8.27	7.97	7.78	27.17	23.84	23.97	24.1	27.31	26.26	14.68	14.93	13.86	5.71	4.79	5.23	6.74	5.03	7.02	21.13	20.6	6.92	8.03667	8.00667	24.9933	25.89	14.49	5.24333	6.26333
LOC107426023	turquoise	uncharacterized LOC107426023	#N/A	GO:0005634,nucleus; GO:0001046,core promoter sequence-specific DNA binding; GO:0003700,DNA-binding transcription factor activity; GO:0046983,protein dimerization activity; GO:0001228,DNA-binding transcription activator activity, RNA polymerase II-specific; GO:0055046,microgametogenesis; GO:0048235,pollen sperm cell differentiation; GO:0006355,regulation of transcription, DNA-templated; GO:0080147…	bHLH	4.51	4.54	4.91	5.33	4.5	4.36	0.29	0.22	0.46	0.24	0.31	0.36	0.21	0.36	0.45	5.94	4.04	5.01	5.26	6.26	5.9	1.31	1.25	1.01	0.57	1.04	1.41	1.19	1.51	1.46	4.65333	4.73	0.323333	0.303333	0.34	4.99667	5.80667	1.19	1.00667	1.38667
LOC107426060	blue	zinc finger protein CONSTANS-LIKE 13	At2g47890	GO:0005634,nucleus; GO:0003700,DNA-binding transcription factor activity; GO:0043565,sequence-specific DNA binding; GO:0044212,transcription regulatory region DNA binding; GO:0008270,zinc ion binding; GO:0006355,regulation of transcription, DNA-templated; GO:0140110,transcription regulator activity; GO:0003674,molecular_function; GO:0003676,nucleic acid binding; GO:0003677,DNA binding; GO:0005488…	C2C2-CO-like	46.44	45.07	43.32	47.6	45.87	48.27	13.75	13.19	13.02	20.73	19.32	19.74	9.86	11.06	12.76	35.74	37.99	37.06	33.94	34.64	34.46	29.01	28.72	28.8	17.79	16.49	19.52	18.33	16.41	17.28	44.9433	47.2467	13.32	19.93	11.2267	36.93	34.3467	28.8433	17.9333	17.34
LOC107426080	brown	tubby-like F-box protein 3	estExt_fgenesh4_pg.C_LG_VIII1741	GO:0005654,nucleoplasm; GO:0005886,plasma membrane; GO:0009536,plastid; GO:0035091,phosphatidylinositol binding; GO:0003674,molecular_function; GO:0005488,binding; GO:0005543,phospholipid binding; GO:0008289,lipid binding; GO:0043167,ion binding; GO:0043168,anion binding; GO:0005622,intracellular; GO:0005575,cellular_component; GO:0005623,cell; GO:0005634,nucleus; GO:0043231,intracellular membran…	TUB	54.9	52.85	55.68	47.19	48.84	52.79	13.99	11.36	12.94	30.68	30.16	31.02	10.65	14.6	12.33	57.92	50.96	55.04	53.68	54.44	58.47	37.06	34.85	38.68	19.13	19.56	19.1	15.61	13.86	14.5	54.4767	49.6067	12.7633	30.62	12.5267	54.64	55.53	36.8633	19.2633	14.6567
LOC107426113	turquoise	probable WRKY transcription factor 35	eugene3.00140651	GO:0005634,nucleus; GO:0003700,DNA-binding transcription factor activity; GO:0043565,sequence-specific DNA binding; GO:0009793,embryo development ending in seed dormancy; GO:0009555,pollen development; GO:0006351,transcription, DNA-templated; GO:0140110,transcription regulator activity; GO:0003674,molecular_function; GO:0003676,nucleic acid binding; GO:0003677,DNA binding; GO:0005488,binding; GO:…	WRKY	3.07	2.92	2.78	17.33	19.77	20	10.86	12.56	13.12	36.74	36.9	32.13	7.54	7.02	6.13	2.09	1.64	1.55	1.21	0.89	0.61	27.52	25.71	24.21	26.59	23.42	27.9	14.56	15.71	20.37	2.92333	19.0333	12.18	35.2567	6.89667	1.76	0.903333	25.8133	25.97	16.88
LOC107426114	red	transcription factor MYB78	#N/A	GO:0005634,nucleus; GO:0000981,DNA-binding transcription factor activity, RNA polymerase II-specific; GO:0043565,sequence-specific DNA binding; GO:0001135,RNA polymerase II transcription regulator recruiting activity; GO:0044212,transcription regulatory region DNA binding; GO:0030154,cell differentiation; GO:1901002,positive regulation of response to salt stress; GO:1902584,positive regulation of…	MYB	0.61	0.94	0.56	4.87	4.1	5.24	108.77	101.82	103.52	64.98	67.78	67.15	97.88	103.93	98.24	1.88	1.35	1.01	2.83	0.83	0.93	17.72	19.05	15.95	40.52	43.99	40.8	69.33	71.2	67.18	0.703333	4.73667	104.703	66.6367	100.017	1.41333	1.53	17.5733	41.77	69.2367
LOC107426380	brown	protein FAR1-RELATED SEQUENCE 11-like	At1g10240	GO:0005634,nucleus; GO:0008270,zinc ion binding; GO:0006355,regulation of transcription, DNA-templated; GO:0003674,molecular_function; GO:0005488,binding; GO:0046872,metal ion binding; GO:0043167,ion binding; GO:0043169,cation binding; GO:0046914,transition metal ion binding; GO:0008152,metabolic process; GO:0006139,nucleobase-containing compound metabolic process; GO:0006351,transcription, DNA-t…	FAR1	5.43	6.25	5.97	4.56	4.85	6.2	17.58	18.01	18.83	12.03	11.72	12.18	22.23	22.3	22.22	6.36	5.22	6.22	5.66	6.44	6.1	6.69	7.52	7.42	9.99	10.95	10.71	15.45	15.62	15.45	5.88333	5.20333	18.14	11.9767	22.25	5.93333	6.06667	7.21	10.55	15.5067
LOC107426473	blue	ethylene-responsive transcription factor-like protein At4g13040	At4g13040	GO:0005634,nucleus; GO:0003677,DNA binding; GO:0003700,DNA-binding transcription factor activity; GO:0009873,ethylene-activated signaling pathway; GO:0007275,multicellular organism development; GO:0006351,transcription, DNA-templated; GO:0003674,molecular_function; GO:0003676,nucleic acid binding; GO:0005488,binding; GO:0097159,organic cyclic compound binding; GO:1901363,heterocyclic compound bin…	AP2/ERF-ERF	13.61	13.85	13.66	7.93	7.96	7.99	2.01	2.46	2.07	3.72	4.19	3.54	2.28	2.43	2.43	12.94	9.61	11.33	9.44	9.9	9.18	3.25	3.62	3.53	3.67	3.18	4.22	3.78	2.64	2.44	13.7067	7.96	2.18	3.81667	2.38	11.2933	9.50667	3.46667	3.69	2.95333
LOC107426540	turquoise	zinc finger matrin-type protein 3-like	At1g74520	GO:0016021,integral component of membrane; GO:0042538,hyperosmotic salinity response; GO:0009737,response to abscisic acid; GO:0009409,response to cold; GO:0009414,response to water deprivation; GO:0006950,response to stress; GO:0006970,response to osmotic stress; GO:0006972,hyperosmotic response; GO:0008150,biological_process; GO:0009628,response to abiotic stimulus; GO:0009651,response to salt …	C2H2	32.09	32.52	32.42	24.51	21.39	20	2.73	2.75	2.68	3.95	4.2	4.75	1.75	2.01	2.14	31.72	32.3	31.8	35.68	32.46	31.84	13.74	15.43	13.26	6.14	6.17	7.11	3.57	4.06	3.13	32.3433	21.9667	2.72	4.3	1.96667	31.94	33.3267	14.1433	6.47333	3.58667
LOC107426789	turquoise	probable WRKY transcription factor 32	#N/A	GO:0005634,nucleus; GO:0003700,DNA-binding transcription factor activity; GO:0043565,sequence-specific DNA binding; GO:0006351,transcription, DNA-templated; GO:0140110,transcription regulator activity; GO:0003674,molecular_function; GO:0003676,nucleic acid binding; GO:0003677,DNA binding; GO:0005488,binding; GO:0097159,organic cyclic compound binding; GO:1901363,heterocyclic compound binding; GO:…	WRKY	3.39	3.86	4.04	2.76	2.65	2.82	6.12	7.14	6.63	5.28	4.77	4.44	6.85	5.75	5.98	1.91	2.61	1.89	2.14	2.29	2.54	3.48	2.38	2.72	4.53	3.82	3.99	6.05	6.89	7.93	3.76333	2.74333	6.63	4.83	6.19333	2.13667	2.32333	2.86	4.11333	6.95667
LOC107426833	yellow	zinc finger protein ZAT10	At1g27730	GO:0005634,nucleus; GO:0003700,DNA-binding transcription factor activity; GO:0046872,metal ion binding; GO:0043565,sequence-specific DNA binding; GO:0035264,multicellular organism growth; GO:0045892,negative regulation of transcription, DNA-templated; GO:0010117,photoprotection; GO:0015979,photosynthesis; GO:0009737,response to abscisic acid; GO:0010200,response to chitin; GO:0009409,response to …	C2H2	4.79	5.46	5.94	8.97	10.82	8.86	123.22	128.99	132.04	87.43	90.94	80.14	126.31	121.78	122.75	5.49	5.54	5.07	7.32	3.27	3.73	27.14	23.28	23.84	216.08	210.69	248.94	432.51	445.78	450.91	5.39667	9.55	128.083	86.17	123.613	5.36667	4.77333	24.7533	225.237	443.067
LOC107426870	turquoise	probable WRKY transcription factor 32	#N/A	GO:0005634,nucleus; GO:0003700,DNA-binding transcription factor activity; GO:0043565,sequence-specific DNA binding; GO:0006351,transcription, DNA-templated; GO:0140110,transcription regulator activity; GO:0003674,molecular_function; GO:0003676,nucleic acid binding; GO:0003677,DNA binding; GO:0005488,binding; GO:0097159,organic cyclic compound binding; GO:1901363,heterocyclic compound binding; GO:…	WRKY	15.96	14.97	12.92	12.19	15.23	12.65	27.38	27.8	26.67	18.52	18.65	19.1	29.58	24.96	26.42	10.78	12.24	9.57	8.81	8.88	9.11	12.1	11.96	11.67	15.79	15.64	16.55	26.69	25.49	27.76	14.6167	13.3567	27.2833	18.7567	26.9867	10.8633	8.93333	11.91	15.9933	26.6467
LOC107426981	brown	PHD finger protein ALFIN-LIKE 7	#N/A	GO:0005634,nucleus; GO:0046872,metal ion binding; GO:0035064,methylated histone binding; GO:0016569,covalent chromatin modification; GO:0006355,regulation of transcription, DNA-templated; GO:0006351,transcription, DNA-templated; GO:0003674,molecular_function; GO:0005488,binding; GO:0043167,ion binding; GO:0043169,cation binding; GO:0005515,protein binding; GO:0042393,histone binding; GO:0140030,m…	Alfin-like	63.36	63.17	59.62	60.25	60.86	60.48	89.85	99.34	91.41	75.07	75.3	82.97	89.11	87.25	87.01	63.45	61.65	65.59	60.23	66.31	59.97	65.2	67.53	65.56	77.14	78.1	68.74	91.46	91.12	80.49	62.05	60.53	93.5333	77.78	87.79	63.5633	62.17	66.0967	74.66	87.69
LOC107427056	turquoise	two-component response regulator ARR18-like	#N/A	GO:0005634,nucleus; GO:0003677,DNA binding; GO:0003700,DNA-binding transcription factor activity; GO:0009736,cytokinin-activated signaling pathway; GO:0000160,phosphorelay signal transduction system; GO:0006351,transcription, DNA-templated; GO:0003674,molecular_function; GO:0003676,nucleic acid binding; GO:0005488,binding; GO:0097159,organic cyclic compound binding; GO:1901363,heterocyclic compou…	GARP-ARR-B	0.63	0.6	0.42	0.6	0.61	0.9	0.02	0.21	0.07	0.18	0.12	0.15	0.08	0.07	0.13	2.23	2.01	1.83	1.55	1.13	1.63	0.31	0.69	0.16	0.26	0.38	0.43	0.47	0.1	0.04	0.55	0.703333	0.1	0.15	0.0933333	2.02333	1.43667	0.386667	0.356667	0.203333
LOC107427086	turquoise	bZIP transcription factor 46-like	#N/A	GO:0005634,nucleus; GO:0003677,DNA binding; GO:0003700,DNA-binding transcription factor activity; GO:0009738,abscisic acid-activated signaling pathway; GO:0006351,transcription, DNA-templated; GO:0003674,molecular_function; GO:0003676,nucleic acid binding; GO:0005488,binding; GO:0097159,organic cyclic compound binding; GO:1901363,heterocyclic compound binding; GO:0140110,transcription regulator a…	bZIP	8.34	9.2	9.42	4.5	3.99	4.76	4.76	4.86	3.93	3.05	3.68	2.94	1.68	2.23	2.01	20.42	20.93	21.21	22.72	18.34	18.25	3.71	3.72	3.64	3.87	3.98	4.16	3.86	3.41	3.58	8.98667	4.41667	4.51667	3.22333	1.97333	20.8533	19.77	3.69	4.00333	3.61667
LOC107427130	brown	transcription termination factor MTERF6, chloroplastic/mitochondrial	At4g38160	GO:0009507,chloroplast; GO:0005739,mitochondrion; GO:0003690,double-stranded DNA binding; GO:0003723,RNA binding; GO:0006353,DNA-templated transcription, termination; GO:0006355,regulation of transcription, DNA-templated; GO:0008033,tRNA processing; GO:0003674,molecular_function; GO:0003676,nucleic acid binding; GO:0003677,DNA binding; GO:0005488,binding; GO:0097159,organic cyclic compound bindin…	mTERF	9	9.21	8.81	12.07	13.64	11.12	1.3	0.89	0.9	3.71	3.94	3.82	1.44	1.16	1.3	11.43	10.09	11.15	8.65	8.44	8.01	5.02	5.28	5.32	2.04	1.91	3.57	0.87	0.96	1.08	9.00667	12.2767	1.03	3.82333	1.3	10.89	8.36667	5.20667	2.50667	0.97
LOC107427542	turquoise	uncharacterized methyltransferase At2g41040, chloroplastic-like	estExt_fgenesh4_pg.C_1520037	GO:0009507,chloroplast; GO:0010287,plastoglobule; GO:0008168,methyltransferase activity; GO:0080167,response to karrikin; GO:0003674,molecular_function; GO:0003824,catalytic activity; GO:0016740,transferase activity; GO:0016741,transferase activity, transferring one-carbon groups; GO:0008150,biological_process; GO:0009628,response to abiotic stimulus; GO:0050896,response to stimulus; GO:0005622,i…	C2H2	4.47	3.11	4.12	1.46	2	2.36	0.96	0.65	0.62	1.02	1.6	1.03	0.41	0.44	0.37	4.35	4.57	4.33	5.21	4.84	5.33	2	3.19	2.89	2.06	2.48	2.49	0.61	0.97	1.28	3.9	1.94	0.743333	1.21667	0.406667	4.41667	5.12667	2.69333	2.34333	0.953333
LOC107427999	blue	histone-lysine N-methyltransferase, H3 lysine-9 specific SUVH4	#N/A	GO:0000775,chromosome, centromeric region; GO:0005634,nucleus; GO:0010385,double-stranded methylated DNA binding; GO:0046974,histone methyltransferase activity (H3-K9 specific); GO:0008327,methyl-CpG binding; GO:0010428,methyl-CpNpG binding; GO:0010429,methyl-CpNpN binding; GO:0008270,zinc ion binding; GO:0051567,histone H3-K9 methylation; GO:0016571,histone methylation; GO:0010216,maintenance of…	SET	31.17	33.22	31.49	26.95	24.64	28.93	5.05	5.09	5.46	4.25	4.99	4.67	4.15	3.63	4.19	23.34	20.51	22.9	19.88	22.74	22.33	19.39	21.43	19	7.04	8.55	7.91	4.99	4.8	5.3	31.96	26.84	5.2	4.63667	3.99	22.25	21.65	19.94	7.83333	5.03
LOC107428022	turquoise	NAC domain-containing protein 83	#N/A	GO:0005634,nucleus; GO:0003677,DNA binding; GO:0003700,DNA-binding transcription factor activity; GO:0010150,leaf senescence; GO:0045892,negative regulation of transcription, DNA-templated; GO:0009737,response to abscisic acid; GO:0009651,response to salt stress; GO:0006351,transcription, DNA-templated; GO:0016032,viral process; GO:0010089,xylem development; GO:0003674,molecular_function; GO:0003…	NAC	48.53	46.13	44.2	25.25	27.26	23.46	3.5	2.25	2.07	4.98	5.37	4.21	3.67	3.96	4.1	72.41	66.34	65.5	52.37	46.3	43.83	6.35	6.61	6.04	13.59	12.47	15.55	2.73	1.44	2.39	46.2867	25.3233	2.60667	4.85333	3.91	68.0833	47.5	6.33333	13.87	2.18667
LOC107428027	turquoise	TMV resistance protein N-like	At5g36930	GO:0005737,cytoplasm; GO:0043531,ADP binding; GO:0005524,ATP binding; GO:0009626,plant-type hypersensitive response; GO:0007165,signal transduction; GO:0000166,nucleotide binding; GO:0003674,molecular_function; GO:0005488,binding; GO:0017076,purine nucleotide binding; GO:0030554,adenyl nucleotide binding; GO:0032553,ribonucleotide binding; GO:0032555,purine ribonucleotide binding; GO:0032559,aden…	TCP	1.05	1.79	1.31	2.43	3.9	1.98	0.21	0.56	0.25	0.18	0.31	0.2	0.04	0.12	0.23	4.47	5.47	4.18	8.31	6.16	6.99	1.82	1.98	1.51	1.55	1.44	1.7	0.56	0.36	0.39	1.38333	2.77	0.34	0.23	0.13	4.70667	7.15333	1.77	1.56333	0.436667
LOC107428076	brown	myb family transcription factor PHL6	At3g13040	GO:0005634,nucleus; GO:0003677,DNA binding; GO:0003700,DNA-binding transcription factor activity; GO:0006355,regulation of transcription, DNA-templated; GO:0006351,transcription, DNA-templated; GO:0003674,molecular_function; GO:0003676,nucleic acid binding; GO:0005488,binding; GO:0097159,organic cyclic compound binding; GO:1901363,heterocyclic compound binding; GO:0140110,transcription regulator …	GARP-G2-like	7.97	8.55	6.79	15.49	14.79	13.64	53.27	57.56	55.22	48.81	48.67	49.2	47.56	46.17	48.78	6.09	5.49	6.45	5.4	6.21	4.74	23.75	20.06	20.23	47.34	45.43	63.82	35.02	37.92	39.98	7.77	14.64	55.35	48.8933	47.5033	6.01	5.45	21.3467	52.1967	37.64
LOC107428302	blue	truncated transcription factor CAULIFLOWER A-like	At5g10140	GO:0005634,nucleus; GO:0003700,DNA-binding transcription factor activity; GO:0046983,protein dimerization activity; GO:0000977,RNA polymerase II regulatory region sequence-specific DNA binding; GO:0045944,positive regulation of transcription by RNA polymerase II; GO:0006351,transcription, DNA-templated; GO:0140110,transcription regulator activity; GO:0003674,molecular_function; GO:0005515,protein…	MADS-MIKC	4.55	6.43	7.18	2.78	2.61	2.85	0.05	0.18	0.15	0.18	0.31	0.13	0.23	0.23	0.28	1.27	1.43	1.95	2.57	2.49	2.57	1.45	1.04	0.93	0.46	0.29	0.27	0.4	0.15	0.08	6.05333	2.74667	0.126667	0.206667	0.246667	1.55	2.54333	1.14	0.34	0.21
LOC107428311	turquoise	squamosa promoter-binding-like protein 3	At5g43270	GO:0005634,nucleus; GO:0003677,DNA binding; GO:0046872,metal ion binding; GO:0006355,regulation of transcription, DNA-templated; GO:0006351,transcription, DNA-templated; GO:0003674,molecular_function; GO:0003676,nucleic acid binding; GO:0005488,binding; GO:0097159,organic cyclic compound binding; GO:1901363,heterocyclic compound binding; GO:0043167,ion binding; GO:0043169,cation binding; GO:00081…	SBP	17.64	17.75	16.48	20	18.18	21.02	7.66	5.83	6.12	8.37	8.2	8.26	5.82	5.71	6.16	50.36	51.06	50.18	47.37	43.67	47	19.12	19.22	18.69	8.65	10.13	9.8	6.59	7.41	6.58	17.29	19.7333	6.53667	8.27667	5.89667	50.5333	46.0133	19.01	9.52667	6.86
LOC107428463	turquoise	two-component response regulator ARR11	At1g67710	GO:0005634,nucleus; GO:0003677,DNA binding; GO:0003700,DNA-binding transcription factor activity; GO:0009736,cytokinin-activated signaling pathway; GO:0000160,phosphorelay signal transduction system; GO:0010082,regulation of root meristem growth; GO:0006355,regulation of transcription, DNA-templated; GO:0006351,transcription, DNA-templated; GO:0003674,molecular_function; GO:0003676,nucleic acid b…	GARP-ARR-B	0.81	0.7	0.84	1.14	1.35	1.3	0.33	0.33	0.22	0.59	0.4	0.41	0.53	0.26	0.26	1.71	1.65	1.68	1.29	1.49	1.09	1.21	0.74	1	0.55	0.62	0.88	0.61	0.15	0.4	0.783333	1.26333	0.293333	0.466667	0.35	1.68	1.29	0.983333	0.683333	0.386667
LOC107428714	turquoise	transcription factor TGA2.2-like	At3g12250	GO:0005634,nucleus; GO:0003700,DNA-binding transcription factor activity; GO:0043565,sequence-specific DNA binding; GO:0006952,defense response; GO:0006351,transcription, DNA-templated; GO:0140110,transcription regulator activity; GO:0003674,molecular_function; GO:0003676,nucleic acid binding; GO:0003677,DNA binding; GO:0005488,binding; GO:0097159,organic cyclic compound binding; GO:1901363,heter…	bZIP	9.67	11.01	9.39	9.7	8.84	8.91	3.02	2.92	3.66	3.72	4.2	4.21	2.91	2.37	2.64	10.92	13.48	11.17	12.9	10.57	9.38	7.09	7.07	6.64	5.02	5.31	4.93	4.9	7.1	5.45	10.0233	9.15	3.2	4.04333	2.64	11.8567	10.95	6.93333	5.08667	5.81667
LOC107428804	brown	homeobox-leucine zipper protein HAT5	estExt_fgenesh4_pm.C_LG_II0461	GO:0005634,nucleus; GO:0003700,DNA-binding transcription factor activity; GO:0043565,sequence-specific DNA binding; GO:0030308,negative regulation of cell growth; GO:0048573,photoperiodism, flowering; GO:0045893,positive regulation of transcription, DNA-templated; GO:0048510,regulation of timing of transition from vegetative to reproductive phase; GO:0009637,response to blue light; GO:0006351,tra…	HB-HD-ZIP	10.07	14.02	10.79	22.72	20.55	18.77	92.72	95.06	87.55	88.91	89.31	90.07	76.41	70.65	80.7	17.65	15.39	17.39	19.47	14.34	16.23	45.59	41.11	45.92	37.63	37.16	41.72	92.37	91.85	91.16	11.6267	20.68	91.7767	89.43	75.92	16.81	16.68	44.2067	38.8367	91.7933
LOC107428978	turquoise	transcription factor TCP15-like	fgenesh4_pg.C_scaffold_160000018	GO:0005634,nucleus; GO:0003677,DNA binding; GO:0003700,DNA-binding transcription factor activity; GO:0008283,cell proliferation; GO:0010229,inflorescence development; GO:0031347,regulation of defense response; GO:0010029,regulation of seed germination; GO:0006355,regulation of transcription, DNA-templated; GO:0009737,response to abscisic acid; GO:0009735,response to cytokinin; GO:0009739,response…	TCP	3.59	2.36	5.19	2.75	2.84	3.51	0.91	1.42	0.8	0.84	0.57	0.31	0.68	0.75	0.87	11.44	10.77	11.67	10.03	8.82	11.74	3.03	2.59	2.71	1.64	3.1	1.67	1.42	0.92	0.78	3.71333	3.03333	1.04333	0.573333	0.766667	11.2933	10.1967	2.77667	2.13667	1.04
LOC107429070	turquoise	squamosa promoter-binding-like protein 6	At1g69170	GO:0005634,nucleus; GO:0003677,DNA binding; GO:0003700,DNA-binding transcription factor activity; GO:0046872,metal ion binding; GO:0042742,defense response to bacterium; GO:0010468,regulation of gene expression; GO:0006355,regulation of transcription, DNA-templated; GO:0006351,transcription, DNA-templated; GO:0003674,molecular_function; GO:0003676,nucleic acid binding; GO:0005488,binding; GO:0097…	SBP	2.32	2.92	1.67	1.61	1.53	2	0.02	0.07	0	0	0.07	0.1	0	0.03	0.03	13.85	12.61	13.83	14.86	17.05	17.94	0.55	0.73	0.71	0.09	0.13	0.1	0.05	0.05	0.04	2.30333	1.71333	0.03	0.0566667	0.02	13.43	16.6167	0.663333	0.106667	0.0466667
LOC107429212	blue	zinc finger protein 4-like	At1g66140	GO:0005634,nucleus; GO:0003700,DNA-binding transcription factor activity; GO:0046872,metal ion binding; GO:0043565,sequence-specific DNA binding; GO:0044212,transcription regulatory region DNA binding; GO:0009738,abscisic acid-activated signaling pathway; GO:0019760,glucosinolate metabolic process; GO:0009788,negative regulation of abscisic acid-activated signaling pathway; GO:0006355,regulation …	C2H2	11.55	12.76	12.13	9.14	9.15	8.52	1.79	0.96	2.31	1.93	2.04	1.5	1.38	1.36	1.24	9.66	11.92	11.1	12.73	11.62	9.02	5.74	6.49	5.81	2.71	4.15	3.59	2.11	1.13	1.55	12.1467	8.93667	1.68667	1.82333	1.32667	10.8933	11.1233	6.01333	3.48333	1.59667
LOC107429443	brown	zinc finger protein CONSTANS-LIKE 16-like	gw1.VIII.1135.1	GO:0016020,membrane; GO:0005634,nucleus; GO:0003700,DNA-binding transcription factor activity; GO:0008270,zinc ion binding; GO:0006355,regulation of transcription, DNA-templated; GO:0140110,transcription regulator activity; GO:0003674,molecular_function; GO:0005488,binding; GO:0046872,metal ion binding; GO:0043167,ion binding; GO:0043169,cation binding; GO:0046914,transition metal ion binding; GO…	C2C2-CO-like	13.36	12.55	13.14	23.88	27	25.06	0.72	0.83	1.17	7.14	5.29	7.04	0.57	0.78	0.83	16.36	19.82	18.55	16.36	15.21	15.38	12.13	10.29	10.97	6.07	6.81	8.2	0.56	1.22	0.93	13.0167	25.3133	0.906667	6.49	0.726667	18.2433	15.65	11.13	7.02667	0.903333
LOC107429517	blue	AP2/ERF and B3 domain-containing transcription factor RAV1-like	Pt-RAV2.1	GO:0005634,nucleus; GO:0003677,DNA binding; GO:0003700,DNA-binding transcription factor activity; GO:0009873,ethylene-activated signaling pathway; GO:0048573,photoperiodism, flowering; GO:0006351,transcription, DNA-templated; GO:0003674,molecular_function; GO:0003676,nucleic acid binding; GO:0005488,binding; GO:0097159,organic cyclic compound binding; GO:1901363,heterocyclic compound binding; GO:…	AP2/ERF-RAV	221.44	207.87	235.67	132.11	141.18	132.24	2.35	2.84	2.06	3.25	2.98	2.74	2.44	1.89	2.33	106.44	99.6	103.92	77.4	66.44	76.87	32.62	34.38	33.12	17.19	17.09	15.38	4.32	5.32	4.61	221.66	135.177	2.41667	2.99	2.22	103.32	73.57	33.3733	16.5533	4.75
LOC107429830	brown	auxin response factor 9	At4g23980	GO:0005634,nucleus; GO:0003700,DNA-binding transcription factor activity; GO:0043565,sequence-specific DNA binding; GO:0009734,auxin-activated signaling pathway; GO:0006351,transcription, DNA-templated; GO:0140110,transcription regulator activity; GO:0003674,molecular_function; GO:0003676,nucleic acid binding; GO:0003677,DNA binding; GO:0005488,binding; GO:0097159,organic cyclic compound binding;…	B3-ARF	15.13	16	15.42	13.29	13.1	13.25	3.63	3.15	4.49	3.7	4.25	3.54	4.36	4.53	4.44	17.83	17.47	17.08	18.79	17.2	18.55	11.91	13.21	13.69	6.24	7.27	5.13	5.33	5.37	6.45	15.5167	13.2133	3.75667	3.83	4.44333	17.46	18.18	12.9367	6.21333	5.71667
LOC107429884	turquoise	RNA polymerase I termination factor	gw1.XV.2099.1	GO:0005634,nucleus; GO:0000981,DNA-binding transcription factor activity, RNA polymerase II-specific; GO:0043565,sequence-specific DNA binding; GO:0001135,RNA polymerase II transcription regulator recruiting activity; GO:0044212,transcription regulatory region DNA binding; GO:0030154,cell differentiation; GO:1901002,positive regulation of response to salt stress; GO:1902584,positive regulation of…	MYB-related	5.93	5.64	6.42	5.63	6.3	5.64	1.03	1.18	1.36	1.84	1.49	1.33	1.56	1.15	1.62	8.14	7.84	7.01	8.64	6.93	8.04	5.77	4.5	5.47	4.06	3.39	3.67	2.45	2.8	2.41	5.99667	5.85667	1.19	1.55333	1.44333	7.66333	7.87	5.24667	3.70667	2.55333
LOC107430043	brown	trihelix transcription factor GTL1	eugene3.00020637	GO:0005634,nucleus; GO:0003677,DNA binding; GO:0003700,DNA-binding transcription factor activity; GO:0006351,transcription, DNA-templated; GO:0003674,molecular_function; GO:0003676,nucleic acid binding; GO:0005488,binding; GO:0097159,organic cyclic compound binding; GO:1901363,heterocyclic compound binding; GO:0140110,transcription regulator activity; GO:0008152,metabolic process; GO:0006139,nucl…	Trihelix	0.69	0.98	0.91	1.79	1.53	1.76	9.95	9.84	8.75	9.13	9.25	9.36	8.71	7.73	7.97	0.89	1.02	0.82	0.96	0.79	0.95	4.34	5.11	4.92	5.91	5.61	5.79	14.46	16.6	16.27	0.86	1.69333	9.51333	9.24667	8.13667	0.91	0.9	4.79	5.77	15.7767
LOC107430316	brown	O-fucosyltransferase 30	At4g17430	GO:0005768,endosome; GO:0005794,Golgi apparatus; GO:0016021,integral component of membrane; GO:0005802,trans-Golgi network; GO:0016757,transferase activity, transferring glycosyl groups; GO:0006004,fucose metabolic process; GO:0006486,protein glycosylation; GO:0003674,molecular_function; GO:0003824,catalytic activity; GO:0016740,transferase activity; GO:0008152,metabolic process; GO:0005975,carbo…	MYB-related	65.83	64.19	65.36	77.9	71.05	76.43	11.98	11.81	11.76	25.93	23.05	25.3	11.89	10.88	10.06	48	44.97	54.46	49.24	56.96	50.52	36.19	37.21	39.5	17.36	16.63	15.03	10.19	10.65	10.01	65.1267	75.1267	11.85	24.76	10.9433	49.1433	52.24	37.6333	16.34	10.2833
LOC107430344	turquoise	protein FIP2	grail3.0029010501	GO:0005730,nucleolus; GO:0005634,nucleus; GO:0003700,DNA-binding transcription factor activity; GO:0043565,sequence-specific DNA binding; GO:0044212,transcription regulatory region DNA binding; GO:0009793,embryo development ending in seed dormancy; GO:0010029,regulation of seed germination; GO:0048831,regulation of shoot system development; GO:0006355,regulation of transcription, DNA-templated; G…	Trihelix	7.11	8	9.23	9.71	9.51	9.53	2.07	1.93	1.97	2.22	2.52	2.01	1.68	2.3	1.58	10.25	12.03	13.65	12.1	12.99	11.52	8.65	10.14	9.58	4.06	3.02	4.61	5.12	5.26	5.56	8.11333	9.58333	1.99	2.25	1.85333	11.9767	12.2033	9.45667	3.89667	5.31333
LOC107430379	turquoise	ethylene-responsive transcription factor 5-like	Pt-ERF5.2	GO:0005634,nucleus; GO:0003700,DNA-binding transcription factor activity; GO:0043565,sequence-specific DNA binding; GO:0006952,defense response; GO:0009873,ethylene-activated signaling pathway; GO:0010200,response to chitin; GO:0009409,response to cold; GO:0006351,transcription, DNA-templated; GO:0140110,transcription regulator activity; GO:0003674,molecular_function; GO:0003676,nucleic acid bind…	AP2/ERF-ERF	36.79	35.39	37.61	72.42	76.04	66.61	4.01	5.05	5.91	10.35	10.49	9.58	4.46	5.46	4.87	80.1	72.8	87.15	83.9	70.45	77.55	39.44	36.82	35.45	19.24	18.76	20.52	4.59	4.78	5.1	36.5967	71.69	4.99	10.14	4.93	80.0167	77.3	37.2367	19.5067	4.82333
LOC107430586	turquoise	transcription factor MYC2	fgenesh4_pg.C_LG_I000732	GO:0005634,nucleus; GO:0003677,DNA binding; GO:0003700,DNA-binding transcription factor activity; GO:0046983,protein dimerization activity; GO:0043565,sequence-specific DNA binding; GO:0009738,abscisic acid-activated signaling pathway; GO:0009963,positive regulation of flavonoid biosynthetic process; GO:0045893,positive regulation of transcription, DNA-templated; GO:2000068,regulation of defense …	bHLH	324.34	327.69	334.22	216.61	172.7	204.01	83.42	82.68	82.24	65.23	68.41	63.12	81.89	82	80.93	305.4	316.55	308.82	319.27	274.51	346.71	104.37	105.26	103.74	162.47	169.2	151.02	79.81	95.36	98.26	328.75	197.773	82.78	65.5867	81.6067	310.257	313.497	104.457	160.897	91.1433
LOC107430642	turquoise	transcription factor AS1	eugene3.00040855	GO:0000793,condensed chromosome; GO:0005730,nucleolus; GO:0005634,nucleus; GO:0003677,DNA binding; GO:0003700,DNA-binding transcription factor activity; GO:0042803,protein homodimerization activity; GO:0000981,DNA-binding transcription factor activity, RNA polymerase II-specific; GO:0043565,sequence-specific DNA binding; GO:0001135,RNA polymerase II transcription regulator recruiting activity; GO…	MYB	24.07	24.11	24.3	38.63	44.03	47.52	5.82	4.7	5.63	15.72	16.71	16.24	7.54	7.32	6.75	56.84	59.93	60.3	58.98	54.78	58.81	43.14	48.76	47.77	11.24	11.26	10.78	6.59	5.84	6.48	24.16	43.3933	5.38333	16.2233	7.20333	59.0233	57.5233	46.5567	11.0933	6.30333
LOC107430966	turquoise	LRR receptor-like serine/threonine-protein kinase FEI 1	At1g31420	GO:0016021,integral component of membrane; GO:0005886,plasma membrane; GO:0005524,ATP binding; GO:0004674,protein serine/threonine kinase activity; GO:0030244,cellulose biosynthetic process; GO:0000166,nucleotide binding; GO:0003674,molecular_function; GO:0005488,binding; GO:0008144,drug binding; GO:0017076,purine nucleotide binding; GO:0030554,adenyl nucleotide binding; GO:0032553,ribonucleotide…	Trihelix	42.21	42.91	43.19	40.94	43.93	42.89	10.15	7.74	9.37	13.22	12.16	12.86	10.69	10.67	10.54	68.5	63.18	62.73	70.4	73.37	73.96	28.5	26.88	22.58	9.21	10.04	8.97	6.95	7.23	6.89	42.77	42.5867	9.08667	12.7467	10.6333	64.8033	72.5767	25.9867	9.40667	7.02333
LOC107431025	turquoise	transcription repressor OFP1-like	At2g30400	GO:0005634,nucleus; GO:0003677,DNA binding; GO:0045892,negative regulation of transcription, DNA-templated; GO:0006351,transcription, DNA-templated; GO:0003674,molecular_function; GO:0003676,nucleic acid binding; GO:0005488,binding; GO:0097159,organic cyclic compound binding; GO:1901363,heterocyclic compound binding; GO:0008152,metabolic process; GO:0006139,nucleobase-containing compound metaboli…	OFP	33.73	31.57	33.04	74.96	79.38	70.61	70.51	73.99	75.99	73.32	72.12	76.07	81	74.94	75.98	22.82	21.39	23.39	20.75	23.17	21.93	104.12	94.67	99.5	49.1	45.02	55.59	46.51	43.88	50.67	32.78	74.9833	73.4967	73.8367	77.3067	22.5333	21.95	99.43	49.9033	47.02
LOC107431223	turquoise	protein SCARECROW 2	At3g54220	GO:0005634,nucleus; GO:0003700,DNA-binding transcription factor activity; GO:0043565,sequence-specific DNA binding; GO:0008356,asymmetric cell division; GO:0090610,bundle sheath cell fate specification; GO:0009630,gravitropism; GO:0048366,leaf development; GO:0051457,maintenance of protein location in nucleus; GO:0009956,radial pattern formation; GO:0006351,transcription, DNA-templated; GO:014011…	GRAS	0.1	0.14	0.06	0.25	0.08	0.16	0	0	0	0	0.01	0	0	0	0	0.45	0.45	0.34	0.27	0.35	0.34	0.01	0.01	0.02	0	0	0	0	0	0.01	0.1	0.163333	0	0.00333333	0	0.413333	0.32	0.0133333	0	0.00333333
LOC107431286	turquoise	probable WRKY transcription factor 33	At2g38470	GO:0005634,nucleus; GO:0003700,DNA-binding transcription factor activity; GO:0043565,sequence-specific DNA binding; GO:0009738,abscisic acid-activated signaling pathway; GO:0009740,gibberellic acid mediated signaling pathway; GO:0009788,negative regulation of abscisic acid-activated signaling pathway; GO:0009938,negative regulation of gibberellic acid mediated signaling pathway; GO:0045893,positi…	WRKY	15.55	15.58	13.73	13.47	11.53	12.96	1.78	0.82	1.34	3.53	4.08	2.5	1.01	1.54	1.11	32.64	33.79	29.85	26.35	18.54	19.26	3.32	3.6	3.63	25.08	18.39	22.34	2.59	1.42	3.05	14.9533	12.6533	1.31333	3.37	1.22	32.0933	21.3833	3.51667	21.9367	2.35333
LOC107431340	brown	protein IWS1 homolog 1	At1g32130	GO:0005634,nucleus; GO:0009742,brassinosteroid mediated signaling pathway; GO:0032784,regulation of DNA-templated transcription, elongation; GO:2001253,regulation of histone H3-K36 trimethylation; GO:0010793,regulation of mRNA export from nucleus; GO:0050684,regulation of mRNA processing; GO:0006351,transcription, DNA-templated; GO:0007165,signal transduction; GO:0007154,cell communication; GO:00…	IWS1	104.02	101.15	105.39	96.81	94.88	101.02	217.52	225.29	215.6	174.9	167.42	167.75	222.67	213.04	220.08	90.99	90.42	87.89	85.14	88.59	82.35	183.12	169.02	174.97	204.65	209.19	211.2	283.28	291.36	289.06	103.52	97.57	219.47	170.023	218.597	89.7667	85.36	175.703	208.347	287.9
LOC107431803	turquoise	transcription factor MYB3R-1-like	Pt-MYB3.2	GO:0005634,nucleus; GO:0003700,DNA-binding transcription factor activity; GO:0000981,DNA-binding transcription factor activity, RNA polymerase II-specific; GO:0043565,sequence-specific DNA binding; GO:0003713,transcription coactivator activity; GO:0001135,RNA polymerase II transcription regulator recruiting activity; GO:0044212,transcription regulatory region DNA binding; GO:0030154,cell differen…	MYB	0.72	1.13	0.79	1.2	1.12	1.18	0.04	0.03	0.03	0.04	0.02	0.03	0.04	0.02	0.02	1.81	1.98	1.66	2.29	1.94	2.23	0.15	0.1	0.14	0.03	0.08	0.16	0.02	0.06	0.04	0.88	1.16667	0.0333333	0.03	0.0266667	1.81667	2.15333	0.13	0.09	0.04
LOC107431810	turquoise	auxin-responsive protein IAA27-like	At4g29080	GO:0005634,nucleus; GO:0003700,DNA-binding transcription factor activity; GO:0009734,auxin-activated signaling pathway; GO:0009733,response to auxin; GO:0006351,transcription, DNA-templated; GO:0140110,transcription regulator activity; GO:0003674,molecular_function; GO:0007165,signal transduction; GO:0007154,cell communication; GO:0008150,biological_process; GO:0009719,response to endogenous stim…	AUX/IAA	40.54	38.24	40.9	33.27	29.56	30.43	2.84	1.99	2.53	2.42	2.66	2.72	2.06	2.49	2.27	117.32	120.29	121.51	109	97.37	107.09	14.27	15.76	16.29	5.8	5.22	6.42	3.03	4.23	3.15	39.8933	31.0867	2.45333	2.6	2.27333	119.707	104.487	15.44	5.81333	3.47
LOC107432186	turquoise	protein ABSCISIC ACID-INSENSITIVE 5	fgenesh4_pm.C_LG_VI000269	GO:0005634,nucleus; GO:0003677,DNA binding; GO:0003700,DNA-binding transcription factor activity; GO:0009738,abscisic acid-activated signaling pathway; GO:0010187,negative regulation of seed germination; GO:0045893,positive regulation of transcription, DNA-templated; GO:0006355,regulation of transcription, DNA-templated; GO:0009737,response to abscisic acid; GO:0010200,response to chitin; GO:0009…	bZIP	7.77	7.52	7.92	4.41	3.99	4.5	3.13	3.38	3.53	2.19	1.94	2.47	3.28	3.72	3.12	8.76	7.29	7.12	9.47	12	10.7	3.65	3.4	4.47	6.22	6.53	6.91	4.92	6.18	6.01	7.73667	4.3	3.34667	2.2	3.37333	7.72333	10.7233	3.84	6.55333	5.70333
LOC107432336	turquoise	squamosa promoter-binding-like protein 9	At2g42200	GO:0005737,cytoplasm; GO:0005634,nucleus; GO:0003677,DNA binding; GO:0003700,DNA-binding transcription factor activity; GO:0046872,metal ion binding; GO:0048653,anther development; GO:0048366,leaf development; GO:2000025,regulation of leaf formation; GO:0006355,regulation of transcription, DNA-templated; GO:0006351,transcription, DNA-templated; GO:0003674,molecular_function; GO:0003676,nucleic ac…	SBP	0.36	0.74	0.52	1.06	0.64	0.88	0	0	0	0.03	0.09	0	0	0	0	5.03	4.83	4.47	5.35	5.55	5.77	0.1	0.07	0.16	0.03	0.04	0	0	0	0.07	0.54	0.86	0	0.04	0	4.77667	5.55667	0.11	0.0233333	0.0233333
LOC107432496	turquoise	ethylene-responsive transcription factor 4-like	At3g15210	GO:0016604,nuclear body; GO:0005634,nucleus; GO:0003700,DNA-binding transcription factor activity; GO:0043565,sequence-specific DNA binding; GO:0009873,ethylene-activated signaling pathway; GO:0009864,induced systemic resistance, jasmonic acid mediated signaling pathway; GO:0010105,negative regulation of ethylene-activated signaling pathway; GO:0045892,negative regulation of transcription, DNA-te…	AP2/ERF-ERF	88.14	84.35	91.2	88.05	74.61	71.93	5.18	4.24	4.09	5.27	6.29	6.3	3.25	3.51	4.52	145.12	144.18	149.77	176.67	160.16	175.25	51.09	49.19	45.73	47.81	46.36	49.42	9.04	9.47	8.27	87.8967	78.1967	4.50333	5.95333	3.76	146.357	170.693	48.67	47.8633	8.92667
LOC107432542	blue	tubby-like F-box protein 7	#N/A	GO:0005829,cytosol; GO:0005634,nucleus; GO:0005886,plasma membrane; GO:0009536,plastid; GO:0003700,DNA-binding transcription factor activity; GO:0035091,phosphatidylinositol binding; GO:0044212,transcription regulatory region DNA binding; GO:0009555,pollen development; GO:0006355,regulation of transcription, DNA-templated; GO:0009620,response to fungus; GO:0140110,transcription regulator activity…	TUB	69.2	74.45	72.61	72.25	66.75	68.47	24.07	24.52	23.02	35	28.88	31.36	24.81	22.21	23.41	59.47	57.14	65.57	60.26	60.7	56.58	47.38	46.24	46.27	32.56	33.52	31.52	28.55	25.93	25.84	72.0867	69.1567	23.87	31.7467	23.4767	60.7267	59.18	46.63	32.5333	26.7733
LOC107432548	turquoise	transcription factor TCP4	At3g15030	GO:0005634,nucleus; GO:0003677,DNA binding; GO:0003700,DNA-binding transcription factor activity; GO:0030154,cell differentiation; GO:0048826,cotyledon morphogenesis; GO:0009793,embryo development ending in seed dormancy; GO:0048366,leaf development; GO:0009965,leaf morphogenesis; GO:0045962,positive regulation of development, heterochronic; GO:0006355,regulation of transcription, DNA-templated; …	TCP	6.79	6.9	6.82	5.41	5.96	7.27	1.47	1.02	0.85	1.48	1.68	1.6	1.95	1.99	1.65	7.91	7.55	7.52	8.62	7.33	8.35	2.03	2.61	2.2	0.93	0.97	1.27	1.88	1.92	1.98	6.83667	6.21333	1.11333	1.58667	1.86333	7.66	8.1	2.28	1.05667	1.92667
LOC107432572	blue	ethylene-responsive transcription factor 4-like	At3g15210	GO:0016604,nuclear body; GO:0005634,nucleus; GO:0003700,DNA-binding transcription factor activity; GO:0043565,sequence-specific DNA binding; GO:0009873,ethylene-activated signaling pathway; GO:0009864,induced systemic resistance, jasmonic acid mediated signaling pathway; GO:0010105,negative regulation of ethylene-activated signaling pathway; GO:0045892,negative regulation of transcription, DNA-te…	AP2/ERF-ERF	13.61	14.36	15.58	11.34	15.17	11.81	0.53	0.63	0.72	0.9	0.84	0.43	0.43	0.54	0.39	4.81	4.9	5.08	6.2	5.39	6.31	1.41	1.1	1.79	1.33	1.46	2.2	0.25	0.09	0.48	14.5167	12.7733	0.626667	0.723333	0.453333	4.93	5.96667	1.43333	1.66333	0.273333
LOC107432692	turquoise	transcription repressor MYB5-like	At3g13540	GO:0005634,nucleus; GO:0003700,DNA-binding transcription factor activity; GO:0000981,DNA-binding transcription factor activity, RNA polymerase II-specific; GO:0043565,sequence-specific DNA binding; GO:0001135,RNA polymerase II transcription regulator recruiting activity; GO:0044212,transcription regulatory region DNA binding; GO:0048354,mucilage biosynthetic process involved in seed coat developm…	MYB	0.94	0.97	0.78	1.78	0.87	1.42	5.69	7.5	7.49	4.58	6.79	5.04	4.46	4.65	4.16	0.77	0.7	0.67	1.17	0.54	0.59	3.22	4.07	3.35	6.6	8.41	7.75	3.22	3.71	3.57	0.896667	1.35667	6.89333	5.47	4.42333	0.713333	0.766667	3.54667	7.58667	3.5
LOC107433577	turquoise	transcription factor TCP13-like	eugene3.00041091	GO:0009507,chloroplast; GO:0005634,nucleus; GO:0003677,DNA binding; GO:0003700,DNA-binding transcription factor activity; GO:0030154,cell differentiation; GO:0048366,leaf development; GO:0009965,leaf morphogenesis; GO:0045962,positive regulation of development, heterochronic; GO:0031347,regulation of defense response; GO:0006355,regulation of transcription, DNA-templated; GO:0006351,transcription…	TCP	10.28	8.48	10.21	11.94	10.49	11.48	12.69	11.88	10.41	7.68	9.13	7.65	9.92	8.98	10.91	25.85	24.4	26.1	26.13	21.28	24.67	13.34	14.46	14.67	9.49	12.93	10.65	11.45	9.32	9.85	9.65667	11.3033	11.66	8.15333	9.93667	25.45	24.0267	14.1567	11.0233	10.2067
LOC107433611	turquoise	probable WRKY transcription factor 11	estExt_fgenesh4_pg.C_LG_VI0537	GO:0005634,nucleus; GO:0005516,calmodulin binding; GO:0003700,DNA-binding transcription factor activity; GO:0043565,sequence-specific DNA binding; GO:0042742,defense response to bacterium; GO:0010200,response to chitin; GO:0006351,transcription, DNA-templated; GO:0005515,protein binding; GO:0003674,molecular_function; GO:0005488,binding; GO:0140110,transcription regulator activity; GO:0003676,nuc…	WRKY	22.65	20.34	21.26	26.42	27.47	24.26	10.01	9.17	9.98	7.72	8.74	9.56	11.51	12.88	13.77	37.65	35.89	40.27	39.71	38.43	39.61	21.16	20.42	19.68	33.65	28.22	32.1	10.37	11.53	10.43	21.4167	26.05	9.72	8.67333	12.72	37.9367	39.25	20.42	31.3233	10.7767
LOC107433725	brown	zinc finger protein ZAT10-like	At1g27730	GO:0005634,nucleus; GO:0003700,DNA-binding transcription factor activity; GO:0046872,metal ion binding; GO:0043565,sequence-specific DNA binding; GO:0035264,multicellular organism growth; GO:0045892,negative regulation of transcription, DNA-templated; GO:0010117,photoprotection; GO:0015979,photosynthesis; GO:0009737,response to abscisic acid; GO:0010200,response to chitin; GO:0009409,response to …	C2H2	3.53	3.74	2.92	4.52	6.07	4.21	1.01	0.72	1.02	1.66	1.49	1.74	0.77	0.81	0.7	3.38	4.22	3.28	3.52	2.88	3.43	1.8	1.86	1.98	1.85	2.29	2.66	1.28	1.09	1.17	3.39667	4.93333	0.916667	1.63	0.76	3.62667	3.27667	1.88	2.26667	1.18
LOC107433745	turquoise	transcription factor ORG2-like	#N/A	GO:0090575,RNA polymerase II transcription factor complex; GO:0003700,DNA-binding transcription factor activity; GO:0046983,protein dimerization activity; GO:0000977,RNA polymerase II regulatory region sequence-specific DNA binding; GO:0010106,cellular response to iron ion starvation; GO:0055072,iron ion homeostasis; GO:0006357,regulation of transcription by RNA polymerase II; GO:0006355,regulati…	bHLH	0.17	0.16	0.05	0.52	0.19	0.28	0	0	0	0	0	0	0	0	0	1.95	1.58	1.81	2.38	3.56	2.64	0.41	0.66	0.22	0	0	0	0	0	0	0.126667	0.33	0	0	0	1.78	2.86	0.43	0	0
LOC107434239	brown	auxin-responsive protein IAA11	fgenesh4_pm.C_LG_VIII000731	GO:0005634,nucleus; GO:0003700,DNA-binding transcription factor activity; GO:0009734,auxin-activated signaling pathway; GO:0009733,response to auxin; GO:0006351,transcription, DNA-templated; GO:0140110,transcription regulator activity; GO:0003674,molecular_function; GO:0007165,signal transduction; GO:0007154,cell communication; GO:0008150,biological_process; GO:0009719,response to endogenous stim…	AUX/IAA	29.57	31.59	31.12	41.31	36.85	38.72	115.68	113.58	117.8	82.27	87.68	88.36	118.79	110.85	119.25	24.74	23.17	23.59	21.28	23.82	24.08	56	61.02	56.87	87.62	84.69	81.68	95.16	91.84	97.24	30.76	38.96	115.687	86.1033	116.297	23.8333	23.06	57.9633	84.6633	94.7467
LOC107434558	turquoise	protein BASIC PENTACYSTEINE7	eugene3.00290270	GO:0005634,nucleus; GO:0043565,sequence-specific DNA binding; GO:0006355,regulation of transcription, DNA-templated; GO:0009723,response to ethylene; GO:0006351,transcription, DNA-templated; GO:0003674,molecular_function; GO:0003676,nucleic acid binding; GO:0003677,DNA binding; GO:0005488,binding; GO:0097159,organic cyclic compound binding; GO:1901363,heterocyclic compound binding; GO:0008152,met…	BBR-BPC	4.73	3.96	4.71	4.9	4.91	4.57	0.84	0.6	1.02	0.96	0.97	0.69	1.08	0.86	0.7	5.75	5.49	5.9	5.58	5.86	6.07	1.19	1.89	1.59	0.8	0.49	0.3	0.56	0.45	0.49	4.46667	4.79333	0.82	0.873333	0.88	5.71333	5.83667	1.55667	0.53	0.5
LOC107434910	brown	transcription factor MYB124-like	fgenesh4_pg.C_LG_X000857	GO:0005634,nucleus; GO:0003700,DNA-binding transcription factor activity; GO:0000981,DNA-binding transcription factor activity, RNA polymerase II-specific; GO:0043565,sequence-specific DNA binding; GO:0001135,RNA polymerase II transcription regulator recruiting activity; GO:0044212,transcription regulatory region DNA binding; GO:0009553,embryo sac development; GO:0010052,guard cell differentiatio…	MYB	2.8	3.13	3.67	4.08	2.42	2.94	0.25	0.36	0.57	1.28	1.43	0.92	0.46	0.52	0.66	3.68	3.36	3.39	4.38	3.62	3.58	2.31	1.93	2.17	0.9	0.6	1	0.44	0.71	0.66	3.2	3.14667	0.393333	1.21	0.546667	3.47667	3.86	2.13667	0.833333	0.603333
LOC107434964	turquoise	trihelix transcription factor PTL	At5g03680	GO:0005634,nucleus; GO:0003677,DNA binding; GO:0003700,DNA-binding transcription factor activity; GO:0042803,protein homodimerization activity; GO:0048498,establishment of petal orientation; GO:0046621,negative regulation of organ growth; GO:0090428,perianth development; GO:0048441,petal development; GO:0009909,regulation of flower development; GO:0006355,regulation of transcription, DNA-template…	Trihelix	2.24	2.5	2.18	1.96	1.81	2.15	0.38	0.14	0.06	0.24	0.75	0.43	0.32	0.26	0.23	5.63	7.57	7.05	8.4	5.5	6.16	0.79	0.95	0.93	0.31	0.31	0.29	0.16	0.28	0.22	2.30667	1.97333	0.193333	0.473333	0.27	6.75	6.68667	0.89	0.303333	0.22
LOC107435284	turquoise	N-alpha-acetyltransferase MAK3-like	At2g38130	GO:0005737,cytoplasm; GO:0031417,NatC complex; GO:0004596,peptide alpha-N-acetyltransferase activity; GO:0006474,N-terminal protein amino acid acetylation; GO:0003674,molecular_function; GO:0003824,catalytic activity; GO:0008080,N-acetyltransferase activity; GO:0016407,acetyltransferase activity; GO:0016410,N-acyltransferase activity; GO:0016740,transferase activity; GO:0016746,transferase activi…	GNAT	5.66	4.03	5.22	4.51	4.97	2.54	1.03	0.52	0.97	1.84	1.08	1.37	0.77	0.64	0.81	6.07	4.34	3.12	3.89	5.65	5.2	4.71	3.84	2.85	2.15	2.14	1.49	2.54	2.59	1.21	4.97	4.00667	0.84	1.43	0.74	4.51	4.91333	3.8	1.92667	2.11333
LOC107435298	red	ethylene-responsive transcription factor RAP2-12-like	#N/A	GO:0005634,nucleus; GO:0003677,DNA binding; GO:0003700,DNA-binding transcription factor activity; GO:0009873,ethylene-activated signaling pathway; GO:0010468,regulation of gene expression; GO:0001666,response to hypoxia; GO:0006351,transcription, DNA-templated; GO:0003674,molecular_function; GO:0003676,nucleic acid binding; GO:0005488,binding; GO:0097159,organic cyclic compound binding; GO:190136…	AP2/ERF-ERF	811.28	788.16	839.55	1204.72	1238.61	1196.68	2146.49	2200.17	2181.73	1751.8	1818.4	1816.16	2226.76	2201.96	2150.91	1068.43	1066.04	1035.97	937.78	1011.92	958.75	1499.58	1451.32	1533.26	1376.33	1386.92	1334.6	1535.68	1422.02	1448.5	812.997	1213.34	2176.13	1795.45	2193.21	1056.81	969.483	1494.72	1365.95	1468.73
LOC107435305	turquoise	GATA transcription factor 9-like	At4g32890	GO:0005634,nucleus; GO:0005667,transcription factor complex; GO:0003682,chromatin binding; GO:0003700,DNA-binding transcription factor activity; GO:0000977,RNA polymerase II regulatory region sequence-specific DNA binding; GO:0001085,RNA polymerase II transcription factor binding; GO:0001228,DNA-binding transcription activator activity, RNA polymerase II-specific; GO:0008270,zinc ion binding; GO:…	C2C2-GATA	8.46	7.41	6.46	9	9.42	9.25	2.57	1.32	1.79	1.78	2.33	2.17	1.68	1.71	2.08	21.81	20.89	21.85	22.02	21.88	19.16	3.17	2.81	3.33	2.41	3.93	2.5	0.54	0.41	0.46	7.44333	9.22333	1.89333	2.09333	1.82333	21.5167	21.02	3.10333	2.94667	0.47
LOC107435498	brown	transcription termination factor MTERF9, chloroplastic	At5g55580	GO:0009507,chloroplast; GO:0003690,double-stranded DNA binding; GO:0019843,rRNA binding; GO:0003727,single-stranded RNA binding; GO:0009658,chloroplast organization; GO:0006353,DNA-templated transcription, termination; GO:0006355,regulation of transcription, DNA-templated; GO:0009651,response to salt stress; GO:0042255,ribosome assembly; GO:0008380,RNA splicing; GO:0048364,root development; GO:00…	mTERF	7.79	7.11	6.31	11.33	10.73	11.39	1.44	1.4	1.47	2.43	3.26	2.88	1.13	0.86	1.09	10.33	10.49	10.06	7.75	7.48	7.49	6.46	7.84	5.85	2.35	2.49	2.68	0.88	1.06	0.8	7.07	11.15	1.43667	2.85667	1.02667	10.2933	7.57333	6.71667	2.50667	0.913333
LOC107435509	turquoise	scarecrow-like protein 21	estExt_Genewise1_v1.C_LG_XIII2678	GO:0005737,cytoplasm; GO:0005634,nucleus; GO:0003700,DNA-binding transcription factor activity; GO:0043565,sequence-specific DNA binding; GO:0004871,NA; GO:0009640,photomorphogenesis; GO:0006355,regulation of transcription, DNA-templated; GO:0006351,transcription, DNA-templated; GO:0140110,transcription regulator activity; GO:0003674,molecular_function; GO:0003676,nucleic acid binding; GO:0003677…	GRAS	8.38	7.65	7.59	6.76	6.71	6.25	2.32	2.35	1.9	3.22	3.18	2.8	2.51	2.32	2.92	7.96	8.48	8.69	9.07	8.66	8.46	3.46	4.16	3.48	3.09	3.49	4.05	1.79	1.33	1.94	7.87333	6.57333	2.19	3.06667	2.58333	8.37667	8.73	3.7	3.54333	1.68667
LOC107435541	blue	protein TIFY 10A	eugene3.01580025	GO:0005634,nucleus; GO:0003714,transcription corepressor activity; GO:0042742,defense response to bacterium; GO:0009908,flower development; GO:0009867,jasmonic acid mediated signaling pathway; GO:1903507,negative regulation of nucleic acid-templated transcription; GO:0009555,pollen development; GO:1900067,regulation of cellular response to alkaline pH; GO:0031347,regulation of defense response; G…	Tify	311.88	293.62	291.34	71.01	59	56.17	3.58	1.94	2.18	4.32	3.26	2.81	2.19	2.39	3.01	110.94	116.91	112.38	85.49	76.17	91.87	2.99	3.99	3.65	11.21	10.35	11.6	4.08	2.65	2.57	298.947	62.06	2.56667	3.46333	2.53	113.41	84.51	3.54333	11.0533	3.1
LOC107435871	turquoise	transcription factor ORG2	#N/A	GO:0090575,RNA polymerase II transcription factor complex; GO:0003700,DNA-binding transcription factor activity; GO:0046983,protein dimerization activity; GO:0000977,RNA polymerase II regulatory region sequence-specific DNA binding; GO:0010106,cellular response to iron ion starvation; GO:0055072,iron ion homeostasis; GO:0006357,regulation of transcription by RNA polymerase II; GO:0006355,regulati…	bHLH	0.92	0.65	0.53	3.77	3.19	2.62	0	0	0	0	0	0	0	0.04	0.08	5.34	5.32	4.43	8.02	7.37	8.47	2.11	2.71	1.83	0.1	0.11	0.08	0	0	0	0.7	3.19333	0	0	0.04	5.03	7.95333	2.21667	0.0966667	0
LOC112488991	red	floral homeotic protein AGAMOUS-like	At2g24840	GO:0005634,nucleus; GO:0043078,polar nucleus; GO:0003700,DNA-binding transcription factor activity; GO:0046983,protein dimerization activity; GO:0000977,RNA polymerase II regulatory region sequence-specific DNA binding; GO:0009559,embryo sac central cell differentiation; GO:0045944,positive regulation of transcription by RNA polymerase II; GO:0006351,transcription, DNA-templated; GO:0140110,trans…	MADS-M-type	3.82	3.92	2.26	4.16	3.46	3	11.08	13.81	11.7	8.76	7.51	8.41	8.62	7.4	7.89	1.8	1.37	1.61	1.56	1.57	1.45	4.75	3.94	4.55	3.96	6.17	4.24	3.73	5.32	5.09	3.33333	3.54	12.1967	8.22667	7.97	1.59333	1.52667	4.41333	4.79	4.71333	编码一个类Agamous转录因子家族的成员。位于雌配子体中央细胞和胚乳的细胞核内。功能缺失突变表明女性生育能力降低。
LOC112491800	brown	transcription factor MYB62-like	At1g68320	GO:0005634,nucleus; GO:0003700,DNA-binding transcription factor activity; GO:0000981,DNA-binding transcription factor activity, RNA polymerase II-specific; GO:0043565,sequence-specific DNA binding; GO:0001135,RNA polymerase II transcription regulator recruiting activity; GO:0044212,transcription regulatory region DNA binding; GO:0030154,cell differentiation; GO:0016036,cellular response to phosph…	MYB	0.71	1.41	0.8	1.63	0.85	1.08	23.7	24.65	22.63	21.02	20.93	17.45	16.76	19.32	15.61	1.98	1.95	1.49	0.44	0.79	0.68	4.11	4.66	3.44	21.73	20.06	18.63	25.43	28.29	22.7	0.973333	1.18667	23.66	19.8	17.23	1.80667	0.636667	4.07	20.14	25.4733
LOC112492580	red	scarecrow-like protein 15	gw1.57.294.1	GO:0005634,nucleus; GO:0003700,DNA-binding transcription factor activity; GO:0043565,sequence-specific DNA binding; GO:0030154,cell differentiation; GO:0048831,regulation of shoot system development; GO:0006355,regulation of transcription, DNA-templated; GO:0006351,transcription, DNA-templated; GO:0140110,transcription regulator activity; GO:0003674,molecular_function; GO:0003676,nucleic acid bin…	GRAS	10.5	10	10.45	14.46	17.22	12.99	237.39	257.67	251.07	234.26	249.39	221.87	232.96	234.9	230.94	12	15.8	12.01	14.41	10.25	12.53	36.93	32.26	34.28	73.13	88.97	83.24	93.9	86.33	86.16	10.3167	14.89	248.71	235.173	232.933	13.27	12.3967	34.49	81.78	88.7967
